# Supplementary material for: Popular interest in vertebrates does not reflect extinction risk and is associated with bias in conservation investment
Source: PubMed Central journal article supplement (PMC6157853; doi:10.1371/journal.pone.0203694), 2018-09-26
Supplement: pone.0203694.s002.pdf [file pone.0203694.s002.pdf]

**S1 Table. The top 100 most Googled vertebrates in the world.** Data corresponding to Figure 2a. The alternative common names that were the terms of the search query for each species (along with the scientific name), are given in the far right column. These are the alternative common names in English, French and Spanish as given on the IUCN red list of threatened species.

| Rank | Scientific name                 | Common name             | Average monthly web search interest | All common names                                                                                                                                                                                                    |
|------|---------------------------------|-------------------------|-------------------------------------|---------------------------------------------------------------------------------------------------------------------------------------------------------------------------------------------------------------------|
| 1    | <i>Panthera tigris</i>          | Tiger                   | 29765.26                            | Tiger, Tigre                                                                                                                                                                                                        |
| 2    | <i>Panthera leo</i>             | Lion                    | 22977.01                            | Lion, African Lion, Lion d'Afrique, León                                                                                                                                                                            |
| 3    | <i>Canis lupus</i>              | Gray Wolf               | 16248.67                            | Gray Wolf, Tundra Wolf, Arctic Wolf, Grey Wolf, Mexican Wolf, Plains Wolf, Timber Wolf, Common Wolf, Wolf, Loup, Loup Gris, Loup Vulgaire, Lobo, Lobo                                                               |
| 4    | <i>Ailuropoda melanoleuca</i>   | Giant Panda             | 8681.54                             | Giant Panda, Panda, Panda géant, Panda Gigante                                                                                                                                                                      |
| 5    | <i>Giraffa camelopardalis</i>   | Giraffe                 | 6278.98                             | Giraffe                                                                                                                                                                                                             |
| 6    | <i>Alces alces</i>              | Moose                   | 5489.53                             | Moose, Eurasian Elk, Elk, European Elk, Eurasian Moose, Siberian Elk, Élan, Alce                                                                                                                                    |
| 7    | <i>Puma concolor</i>            | Puma                    | 5236.48                             | Puma, Mountain Lion, Cougar, Red Tiger, Deer Tiger, León Americano, León Bayo, León Colorado, León De Montaña, Mitzli, Onza Bermeja                                                                                 |
| 8    | <i>Acinonyx jubatus</i>         | Cheetah                 | 4727.21                             | Cheetah, Hunting Leopard, Guépard, Chita, Guepardo                                                                                                                                                                  |
| 9    | <i>Ursus maritimus</i>          | Polar Bear              | 4259.88                             | Polar Bear, Ours polaire, Ours blanc, Oso Polar                                                                                                                                                                     |
| 10   | <i>Orcinus orca</i>             | Killer Whale            | 3951.28                             | Killer Whale, Orca, Orque, Epaulard, Espadarte, Espadarte, Orca                                                                                                                                                     |
| 11   | <i>Panthera pardus</i>          | Leopard                 | 3818.59                             | Leopard, Panthère, Léopard, Leopardo, Pantera                                                                                                                                                                       |
| 12   | <i>Sphyrna mokarran</i>         | Great Hammerhead        | 2981.86                             | Great Hammerhead, Hammerhead Shark, Squat-headed Hammerhead Shark, Grand Requin-marteau, Marieau Millet, Poisson Pantoufflier, Sorosena, Cornuda, El Tiburon, Guardia Civil, Pez Martillo, Tiburon                  |
| 13   | <i>Phascolarctos cinereus</i>   | Koala                   | 2377.63                             | Koala                                                                                                                                                                                                               |
| 14   | <i>Meles meles</i>              | Eurasian Badger         | 2249.35                             | Eurasian Badger, Badger, BLAIREAU EUROPÉEN, Blaireau Européen, Tejón, TEJÓN                                                                                                                                         |
| 15   | <i>Ursus arctos</i>             | Brown Bear              | 2145.13                             | Brown Bear, Mexican Grizzly Bear, Grizzly Bear, Ours brun, Oso Pardo                                                                                                                                                |
| 16   | <i>Pan paniscus</i>             | Bonobo                  | 2105.62                             | Bonobo, Pygmy Chimpanzee, Gracile Chimpanzee, Dwarf Chimpanzee, Chimpanzé Nain, Chimpanzé pygmée, Chimpancé Pigmeo                                                                                                  |
| 17   | <i>Pan troglodytes</i>          | Chimpanzee              | 2027.21                             | Chimpanzee, Robust Chimpanzee, Common Chimpanzee, Chimpanzé, Chimpancé                                                                                                                                              |
| 18   | <i>Panthera onca</i>            | Jaguar                  | 1817.09                             | Jaguar, Tigre Real, Tigre Americano, Otorongo, Yaguar, Yaguarete                                                                                                                                                    |
| 19   | <i>Carcharodon carcharias</i>   | Great White Shark       | 1736.18                             | Great White Shark                                                                                                                                                                                                   |
| 20   | <i>Haliaeetus leucocephalus</i> | Bald Eagle              | 1670.95                             | Bald Eagle                                                                                                                                                                                                          |
| 21   | <i>Balaenoptera musculus</i>    | Blue Whale              | 1526.06                             | Blue Whale, Sibbold's Rorqual, Sulphur-bottom Whale, Pygmy Blue Whale, Baleinoptère bleue, Baleine bleue, Baleine d'ostende, Rorqual à ventre cannelé, Rorqual Bleu, Rorqual de Sibbold, Ballena Azul, Rorcual Azul |
| 22   | <i>Mellivora capensis</i>       | Honey Badger            | 1443.16                             | Honey Badger                                                                                                                                                                                                        |
| 23   | <i>Campephilus principalis</i>  | Ivory-billed Woodpecker | 1421.69                             | Ivory-billed Woodpecker                                                                                                                                                                                             |
| 24   | <i>Orycteropus afer</i>         | Aardvark                | 1394.34                             | Aardvark, Antbear, Oryctérope                                                                                                                                                                                       |

S1 Table continued

| Rank | Scientific name                 | Common name         | Average monthly web search interest | All common names                                                                                                                                                                                                                                                                                                                                                                  |
|------|---------------------------------|---------------------|-------------------------------------|-----------------------------------------------------------------------------------------------------------------------------------------------------------------------------------------------------------------------------------------------------------------------------------------------------------------------------------------------------------------------------------|
| 25   | <i>Felis silvestris</i>         | Wild Cat            | 1376.77                             | Wild Cat, Wildcat, Chat Sauvage, Chat Orné, Gato Montés, Gato Silvestre                                                                                                                                                                                                                                                                                                           |
| 26   | <i>Suricata suricatta</i>       | Meerkat             | 1307.15                             | Meerkat, Slender-tailed Meerkat, Suricate                                                                                                                                                                                                                                                                                                                                         |
| 27   | <i>Vulpes vulpes</i>            | Red Fox             | 1174.18                             | Red Fox, Silver Fox, Cross Fox, RENARD, Renard Roux, ZORRO, Zorro Rojo                                                                                                                                                                                                                                                                                                            |
| 28   | <i>Falco peregrinus</i>         | Peregrine Falcon    | 1166.65                             | Peregrine Falcon, Peregrine, Faucon pèlerin                                                                                                                                                                                                                                                                                                                                       |
| 29   | <i>Chaetodon capistratus</i>    | Butterbun           | 1166.02                             | Butterbun, Butterfly, Four-eye Butterflyfish, Foureye Butterflyfish, Foureye Butterflyfish, Four-eyed butterflyfish, Kete, School Mistress, Marguerite, Parché, Isabelita, Isabelita blanca, Kete, Mariposa, Mariposa ocelada, Parche, Parche ocelado                                                                                                                             |
| 30   | <i>Gorilla gorilla</i>          | Western Gorilla     | 1165.4                              | Western Gorilla, Lowland Gorilla, Gorille, Gorila                                                                                                                                                                                                                                                                                                                                 |
| 31   | <i>Ailurus fulgens</i>          | Red Panda           | 1139.68                             | Red Panda, Lesser Panda, Red Cat-bear, Panda Éclatant, Petit Panda, Panda Chico, Panda Rojo                                                                                                                                                                                                                                                                                       |
| 32   | <i>Hippopotamus amphibius</i>   | Hippopotamus        | 1069.43                             | Hippopotamus, Large Hippo, Common Hippopotamus, Hippopotame, Hipopótamo Anfibio                                                                                                                                                                                                                                                                                                   |
| 33   | <i>Dicentrarchus labrax</i>     | European Seabass    | 1055                                | European Seabass, Common Bass, European Bass, Bass, King Of The Mulletts, Sea Dace, Sea Perch, White Mullet, White Salmon, Capemouth, Loubas Negre, Bar, Bar Commun, Bar Européen, Bar Franc, Bog, Brigue, Drelique, Gutgareo, Loubine, Loup, Loupassou, Loup de Mer, Lubin, Luvassu, Pigne, Baieta, Baila, Cherne, Llop, Llubina, Lubaro, Lubina, Mero, Pintat, Robaliza, Robalo |
| 34   | <i>Pomacanthus imperator</i>    | Emperor Angelfish   | 977.23                              | Emperor Angelfish, Imperial Angelfish, Angelfish, Emperor, Ange de mer impérial, Holacanthus empereur, Poisson ange impérial                                                                                                                                                                                                                                                      |
| 35   | <i>Chanodichthys dabryi</i>     | Humpback            | 963.43                              | Humpback                                                                                                                                                                                                                                                                                                                                                                          |
| 36   | <i>Homo sapiens</i>             | Human               | 922.66                              | Human                                                                                                                                                                                                                                                                                                                                                                             |
| 37   | <i>Mustela erminea</i>          | Ermine              | 892.55                              | Ermine, Stoat, Short-tailed Weasel, Hermine, Armiño                                                                                                                                                                                                                                                                                                                               |
| 38   | <i>Selene brevoortii</i>        | Airfin lookdown     | 882.52                              | Airfin lookdown, Hairfin lookdown, Mexican lookdown, Mexican lookdown (FB), Musso corcovade, Antena, Cara caballa, Carita, Carita jorobada, Espejuelo, Jorobado, Jorobado antena, Jorobado mexicano, Radio                                                                                                                                                                        |
| 39   | <i>Ornithorhynchus anatinus</i> | Platypus            | 859.31                              | Platypus, Duck-billed Platypus, Ornithorynque                                                                                                                                                                                                                                                                                                                                     |
| 40   | <i>Sarcophilus harrisii</i>     | Tasmanian Devil     | 837.98                              | Tasmanian Devil, Diable De Tasmanie                                                                                                                                                                                                                                                                                                                                               |
| 41   | <i>Dacelo novaeguineae</i>      | Laughing Kookaburra | 802.86                              | Laughing Kookaburra, Kookaburra                                                                                                                                                                                                                                                                                                                                                   |
| 42   | <i>Coturnix coturnix</i>        | Common Quail        | 798.47                              | Common Quail, Quail, Caille des blés                                                                                                                                                                                                                                                                                                                                              |
| 43   | <i>Megaptera novaeangliae</i>   | Humpback Whale      | 768.36                              | Humpback Whale, Hump Whale, Hunchbacked Whale, Bunch, Mégaptère, Baleine à bosse, Baleine à taquet, Jubarte, Rorqual à bosse, Rorqual du Cap, Ballena Jorobada, Gubarte, Jorobada, Rorcual Jorobado                                                                                                                                                                               |
| 44   | <i>Cervus elaphus</i>           | Red Deer            | 760.21                              | Red Deer, Bactrian Wapiti, Bokharan Deer, Bukhara Red Deer, Elk, Bactrian Deer, Wapiti, Bactrian Red Deer, Cerf De Bactriane, Cerf Du Turkestan, Cerf Élaphe, Cerf Élaphe Du Turkestan, Cerf Rouge Du Turkestan, Ciervo, Ciervo Bactriano, Ciervo Rojo                                                                                                                            |
| 45   | <i>Martes pennanti</i>          | Fisher              | 720.69                              | Fisher                                                                                                                                                                                                                                                                                                                                                                            |
| 46   | <i>Coryphaena hippurus</i>      | Common Dolphinfish  | 707.52                              | Common Dolphinfish, Dolphinfish, Dolphin Fish, Dorado, Green Dolphin, Mahimahi, Mahi-mahi, Mahi Mahi, Common Dolphin Fish, Clic, Coryphène Commune, Dauphin, Dorade, Dorade Coryphène, Dorado Común, Dorado Delfin, Lampuga, Llampuga                                                                                                                                             |

S1 Table continued

| Rank | Scientific name                 | Common name                | Average monthly web search interest | All common names                                                                                                                                                                                                                                       |
|------|---------------------------------|----------------------------|-------------------------------------|--------------------------------------------------------------------------------------------------------------------------------------------------------------------------------------------------------------------------------------------------------|
| 47   | <i>Dromaius novaehollandiae</i> | Emu                        | 704.38                              | Emu                                                                                                                                                                                                                                                    |
| 48   | <i>Erithacus rubecula</i>       | European Robin             | 696.85                              | European Robin, Robin, Rougegorge                                                                                                                                                                                                                      |
| 49   | <i>Vulpes zerda</i>             | Fennec Fox                 | 694.97                              | Fennec Fox, Fennec                                                                                                                                                                                                                                     |
| 50   | <i>Cuculus canorus</i>          | Common Cuckoo              | 662.36                              | Common Cuckoo, European Cuckoo, Cuckoo, Coucou gris                                                                                                                                                                                                    |
| 51   | <i>Loxodonta africana</i>       | African Elephant           | 655.46                              | African Elephant, Éléphant d'Afrique, Éléphant Africain, Elefante Africano                                                                                                                                                                             |
| 52   | <i>Canis latrans</i>            | Coyote                     | 653.58                              | Coyote, American Jackal, Brush Wolf, Prairie Wolf                                                                                                                                                                                                      |
| 53   | <i>Physeter macrocephalus</i>   | Sperm Whale                | 651.07                              | Sperm Whale, Spermacet Whale, Cachelot, Pot Whale, Cachalot, Ballena Esperma, Ballena Esperma, Cachalote, Cachalote                                                                                                                                    |
| 54   | <i>Dugong dugon</i>             | Dugong                     | 649.19                              | Dugong, Sea Cow, Dugon                                                                                                                                                                                                                                 |
| 55   | <i>Rhincodon typus</i>          | Whale Shark                | 620.33                              | Whale Shark, Requin Baleine, Tiburón Ballena                                                                                                                                                                                                           |
| 56   | <i>Tyto alba</i>                | Barn Owl                   | 606.53                              | Barn Owl, Chouette effraie                                                                                                                                                                                                                             |
| 57   | <i>Mormyrus kannume</i>         | Bottlenose                 | 603.4                               | Bottlenose                                                                                                                                                                                                                                             |
| 58   | <i>Aptenodytes forsteri</i>     | Emperor Penguin            | 585.83                              | Emperor Penguin                                                                                                                                                                                                                                        |
| 59   | <i>Mitsukurina owstoni</i>      | Elfin Shark                | 569.52                              | Elfin Shark, Goblin Shark, Requin Lutin, Tiburones Duende                                                                                                                                                                                              |
| 60   | <i>Panthera uncia</i>           | Snow Leopard               | 541.3                               | Snow Leopard, Ounce, Once, Irbis, Léopard des neiges, Panthère des neiges, Leopardo Nival, Pantera de la Nieves                                                                                                                                        |
| 61   | <i>Oplegnathus insignis</i>     | Pacific Beakfish           | 531.89                              | Pacific Beakfish, Loreta, Loro, San Pedro, Tigris                                                                                                                                                                                                      |
| 62   | <i>Urocyon cinereoargenteus</i> | Grey Fox                   | 523.11                              | Grey Fox, Tree Fox, Gray Fox, Gato De Monte, Gato Cervan, Zorro, Zorro Gris, Zorro Plateado                                                                                                                                                            |
| 63   | <i>Dermochelys coriacea</i>     | Leatherback                | 522.48                              | Leatherback, Leatherback Sea Turtle, Leathery Turtle, Luth, Trunkback Turtle, Trunk Turtle, Coffin-back, Tortue luth, Cardon, Baula, Canal, Dorso de Cuero, Galapagos, Siete Lomos, Siete Quillas, Tinglada, Tinglar, Tora, Tortuga Caná, Tortuga Laud |
| 64   | <i>Eubalaena glacialis</i>      | North Atlantic Right Whale | 516.21                              | North Atlantic Right Whale, Northern Right Whale, Right Whale, Black Right Whale, Baleine De Biscaye, Baleine Des Basques, Ballena, Ballena Franca Del Norte, Ballenga                                                                                 |
| 65   | <i>Struthio camelus</i>         | Ostrich                    | 501.79                              | Ostrich, Common Ostrich, Autruche                                                                                                                                                                                                                      |
| 66   | <i>Ophiophagus hannah</i>       | King Cobra                 | 481.09                              | King Cobra, Hamadryad                                                                                                                                                                                                                                  |
| 67   | <i>Haemulopsis leuciscus</i>    | Raucous grunt              | 463.52                              | Raucous grunt, White grunt, Boquimorado chato, Negro, Ronco roncacho, Ronco ruco                                                                                                                                                                       |
| 68   | <i>Alphesthes multiguttatus</i> | Rivulated Mutton Hamlet    | 459.76                              | Rivulated Mutton Hamlet, Rock Bass, Sea Bass, Pacific Guaseta, Vareche Veine, Varech Veine, Cherne, Cabrilla, Colorado, Companero De Mero, Guaseta Rayada, Guaseta Rayado, Guato, Mero                                                                 |
| 69   | <i>Mustela nivalis</i>          | Least Weasel               | 451.61                              | Least Weasel, Weasel, Belette d'Europe, Comadreja                                                                                                                                                                                                      |
| 70   | <i>Gulo gulo</i>                | Wolverine                  | 436.55                              | Wolverine, GLOUTON, Glouton, Glotón, GLOTÓN                                                                                                                                                                                                            |
| 71   | <i>Canis rufus</i>              | Red Wolf                   | 423.38                              | Red Wolf                                                                                                                                                                                                                                               |
| 72   | <i>Elephas maximus</i>          | Asian Elephant             | 417.48                              | Asian Elephant, Indian Elephant, Éléphant D'Asie, Éléphant D'Inde, Elefante Asiático                                                                                                                                                                   |

S1Table continued

| Rank | Scientific name                | Common name               | Average monthly web search interest | All common names                                                                                                                                                                                                                                                                         |
|------|--------------------------------|---------------------------|-------------------------------------|------------------------------------------------------------------------------------------------------------------------------------------------------------------------------------------------------------------------------------------------------------------------------------------|
| 73   | <i>Nycticebus coucang</i>      | Greater Slow Loris        | 416.88                              | Greater Slow Loris, Sunda Slow Loris, Slow Loris, Loris Lent, Loris Lento                                                                                                                                                                                                                |
| 74   | <i>Tursiops truncatus</i>      | Common Bottlenose Dolphin | 411.49                              | Common Bottlenose Dolphin, Bottlenose Dolphin, Bottle-nosed Dolphin, Bottlenosed Dolphin, Grand Dauphin, dauphin souffleur, grand dauphin, Souffleur, Tursiops, Delfin Mular, Pez Mular, Tursión, Tursión                                                                                |
| 75   | <i>Squatina squatina</i>       | Angel Shark               | 400.17                              | Angel Shark, L'ange, Ange De Mer, Angel, Antjou, Bourgeois, Bourget, L'anelot, Ange, Martrame, Mordacle, Squatine Occelee, Angelote, Mermejuela, Pardon, Pez Angel                                                                                                                       |
| 76   | <i>Bubalus arnee</i>           | Asian Buffalo             | 397.11                              | Asian Buffalo, Asiatic Buffalo, Indian Buffalo, Indian Water Buffalo, Water Buffalo, Wild Asian Buffalo, Wild Water Buffalo, Buffle D'Eau, Buffle De L'Inde, Bufalo Arni                                                                                                                 |
| 77   | <i>Enhydra lutris</i>          | Sea Otter                 | 395.91                              | Sea Otter, Loutre De Mer, Nutria Del Kamtchatka, Nutria Marina                                                                                                                                                                                                                           |
| 78   | <i>Cetorhinus maximus</i>      | Basking Shark             | 387.86                              | Basking Shark, Pelerin, Peregrino                                                                                                                                                                                                                                                        |
| 79   | <i>Pandion haliaetus</i>       | Osprey                    | 355.33                              | Osprey, Balbuzard pêcheur                                                                                                                                                                                                                                                                |
| 80   | <i>Potos flavus</i>            | Kinkajou                  | 334.02                              | Kinkajou, Mico De Noche, Cusu, Martilla, Chosna, Mico León, Mono Michi, Perro De Monte                                                                                                                                                                                                   |
| 81   | <i>Fratercula arctica</i>      | Atlantic Puffin           | 333.66                              | Atlantic Puffin, Puffin                                                                                                                                                                                                                                                                  |
| 82   | <i>Phacochoerus africanus</i>  | Common Warthog            | 332.95                              | Common Warthog, Warthog, Eritrean Warthog, Phacochère Commun                                                                                                                                                                                                                             |
| 83   | <i>Alopias vulpinus</i>        | Common Thresher Shark     | 330.83                              | Common Thresher Shark, Renard, Zorro                                                                                                                                                                                                                                                     |
| 84   | <i>Aquila chrysaetos</i>       | Golden Eagle              | 326.06                              | Golden Eagle, Aigle royal                                                                                                                                                                                                                                                                |
| 85   | <i>Scomberomorus cavalla</i>   | King Mackerel             | 321.51                              | King Mackerel, Kingfish, Maquereau, Thazard Barré, Carite Sierra, Carite, Carite Lucio, Carito, Carito Lucio, Peto, Rey, Serrucho, Sierra                                                                                                                                                |
| 86   | <i>Martes martes</i>           | European Pine Marten      | 314.3                               | European Pine Marten, Pine Marten, Pine Martin, European Pine Martin, Martre Des Pins, MARTRE DES PINS, Marta, MARTA                                                                                                                                                                     |
| 87   | <i>Sciurus carolinensis</i>    | Eastern Gray Squirrel     | 305.58                              | Eastern Gray Squirrel, Gray Squirrel, Grey Squirrel                                                                                                                                                                                                                                      |
| 88   | <i>Hippocampus hippocampus</i> | Short-snouted Seahorse    | 281.28                              | Short-snouted Seahorse, Short Snouted Seahorse, Sea Horse, Hippocampe, Cheval de Mer, Hippocampe à Museau Court, Caballito de Mar, Caballo Marino, Cabalo de Mar                                                                                                                         |
| 89   | <i>Speothos venaticus</i>      | Bush Dog                  | 280.81                              | Bush Dog, Vinegar Dog, Savannah Dog, Chien Des Buissons, Zorro, Perrito Venadero, Cachorro Vinagre, Guanfando, Pero Selvático, Perrito de Monte , Perro de Agua, Perro de la Selva, Perro De Monte, Perro Grullero , Perro Vinagre , Uмба, Zorrito Vinagre, Zorro Pitoco , Zorro Vinagre |
| 90   | <i>Scatophagus argus</i>       | Spotted Scat              | 277.15                              | Spotted Scat, Spotted Butt, Butter Fish, Common Scat, Leopard Scat, Scat, Butterfish, Spotted Butterfish, Spotted Butter Fish, Spotted Scad, Argus Fish, Pavillon Tacheté, Pingo Manchado                                                                                                |
| 91   | <i>Plestiodon tetragrammus</i> | Four-lined Skink          | 275.45                              | Four-lined Skink, Escorpion De Cola Azul, Lince                                                                                                                                                                                                                                          |
| 92   | <i>Anas platyrhynchos</i>      | Mallard                   | 268.05                              | Mallard, Northern Mallard, Common Mallard, Canard colvert                                                                                                                                                                                                                                |
| 93   | <i>Psittirostra psittacea</i>  | Ou                        | 264.78                              | Ou, 'O'u                                                                                                                                                                                                                                                                                 |
| 94   | <i>Harpia harpyja</i>          | Harpy Eagle               | 254.4                               | Harpy Eagle, American Harpy Eagle, Aguila Harpía, Aguila Arpía, Arpía, Arpía Mayor, Harpía                                                                                                                                                                                               |
| 95   | <i>Heloderma suspectum</i>     | Gila Monster              | 253.26                              | Gila Monster, Lézard perlé, Monstre de gila, Monstruo de Gila                                                                                                                                                                                                                            |
| 96   | <i>Heterocephalus glaber</i>   | Naked Mole Rat            | 250.54                              | Naked Mole Rat                                                                                                                                                                                                                                                                           |

**S1 Table continued**

| <b>Rank</b> | <b>Scientific name</b>        | <b>Common name</b> | <b>Average monthly<br/>web search<br/>interest</b> | <b>All common names</b>                                                                                  |
|-------------|-------------------------------|--------------------|----------------------------------------------------|----------------------------------------------------------------------------------------------------------|
| 97          | <i>Scarus guacamaia</i>       | Rainbow Parrotfish | 249.15                                             | Rainbow Parrotfish, Blue Rainbow, Rainbow, Perroquet arc-en-ciel, Guacamaia, Guacamaya, Loro Guacamayo   |
| 98          | <i>Equus africanus</i>        | African Wild Ass   | 248.02                                             | African Wild Ass, Ass, African Ass, Ane sauvage d'Afrique, Âne Sauvage D'Afrique, Asno Salvaje de Africa |
| 99          | <i>Alopex lagopus</i>         | Arctic Fox         | 242.86                                             | Arctic Fox, Polar Fox, Renard Polaire, Isatis, Reynard Polaire, Zorro Ártico                             |
| 100         | <i>Paralichthys dumerilii</i> | Suco croaker       | 239.51                                             | Suco croaker, Bourrugue suco, Barcelona, Lambe suco, Suco rayado                                         |
