# Supplementary material for: Popular interest in vertebrates does not reflect extinction risk and is associated with bias in conservation investment
Source: PubMed Central journal article supplement (PMC6157853; doi:10.1371/journal.pone.0203694), 2018-09-26
Supplement: pone.0203694.s003.pdf [file pone.0203694.s003.pdf]

**S2 Table. The top 100 most Googled mammals in the world.** Data corresponding to Figure 2b.

| Rank | Species                       | Common names    | Average monthly web search interest | All common names                                                                                                                                                                                                    |
|------|-------------------------------|-----------------|-------------------------------------|---------------------------------------------------------------------------------------------------------------------------------------------------------------------------------------------------------------------|
| 1    | <i>Panthera tigris</i>        | Tiger           | 29765.26                            | Tiger, Tigre                                                                                                                                                                                                        |
| 2    | <i>Panthera leo</i>           | Lion            | 22977.01                            | Lion, African Lion, Lion d'Afrique, León                                                                                                                                                                            |
| 3    | <i>Canis lupus</i>            | Gray Wolf       | 16248.67                            | Gray Wolf, Tundra Wolf, Arctic Wolf, Grey Wolf, Mexican Wolf, Plains Wolf, Timber Wolf, Common Wolf, Wolf, Loup, Loup Gris, Loup Vulgaire, Lobo, Lobo                                                               |
| 4    | <i>Ailuropoda melanoleuca</i> | Giant Panda     | 8681.54                             | Giant Panda, Panda, Panda géant, Panda Gigante                                                                                                                                                                      |
| 5    | <i>Giraffa camelopardalis</i> | Giraffe         | 6278.98                             | Giraffe                                                                                                                                                                                                             |
| 6    | <i>Alces alces</i>            | Moose           | 5489.53                             | Moose, Eurasian Elk, Elk, European Elk, Eurasian Moose, Siberian Elk, Élan, Alce                                                                                                                                    |
| 7    | <i>Puma concolor</i>          | Puma            | 5236.48                             | Puma, Mountain Lion, Cougar, Red Tiger, Deer Tiger, León Americano, León Bayo, León Colorado, León De Montaña, Mitzli, Onza Bermeja                                                                                 |
| 8    | <i>Acinonyx jubatus</i>       | Cheetah         | 4727.21                             | Cheetah, Hunting Leopard, Guépard, Chita, Guepardo                                                                                                                                                                  |
| 9    | <i>Ursus maritimus</i>        | Polar Bear      | 4259.88                             | Polar Bear, Ours polaire, Ours blanc, Oso Polar                                                                                                                                                                     |
| 10   | <i>Orcinus orca</i>           | Killer Whale    | 3951.28                             | Killer Whale, Orca, Orque, Epaulard, Espadarte, Espadarte, Orca                                                                                                                                                     |
| 11   | <i>Panthera pardus</i>        | Leopard         | 3818.59                             | Leopard, Panthère, Léopard, Leopardo, Pantera                                                                                                                                                                       |
| 12   | <i>Phascolarctos cinereus</i> | Koala           | 2377.63                             | Koala                                                                                                                                                                                                               |
| 13   | <i>Meles meles</i>            | Eurasian Badger | 2249.35                             | Eurasian Badger, Badger, BLAIREAU EUROPÉEN, Blaireau Européen, Tejón, TEJÓN                                                                                                                                         |
| 14   | <i>Ursus arctos</i>           | Brown Bear      | 2145.13                             | Brown Bear, Mexican Grizzly Bear, Grizzly Bear, Ours brun, Oso Pardo                                                                                                                                                |
| 15   | <i>Pan paniscus</i>           | Bonobo          | 2105.62                             | Bonobo, Pygmy Chimpanzee, Gracile Chimpanzee, Dwarf Chimpanzee, Chimpanzé Nain, Chimpanzé pygmée, Chimpancé Pigmeo                                                                                                  |
| 16   | <i>Pan troglodytes</i>        | Chimpanzee      | 2027.21                             | Chimpanzee, Robust Chimpanzee, Common Chimpanzee, Chimpanzé, Chimpancé                                                                                                                                              |
| 17   | <i>Panthera onca</i>          | Jaguar          | 1817.09                             | Jaguar, Tigre Real, Tigre Americano, Otorongo, Yaguar, Yaguarete                                                                                                                                                    |
| 18   | <i>Balaenoptera musculus</i>  | Blue Whale      | 1526.06                             | Blue Whale, Sibbold's Rorqual, Sulphur-bottom Whale, Pygmy Blue Whale, Baleinoptère bleue, Baleine bleue, Baleine d'ostende, Rorqual à ventre cannelé, Rorqual Bleu, Rorqual de Sibbold, Ballena Azul, Rorcual Azul |
| 19   | <i>Mellivora capensis</i>     | Honey Badger    | 1443.16                             | Honey Badger                                                                                                                                                                                                        |
| 20   | <i>Orycteropus afer</i>       | Aardvark        | 1394.34                             | Aardvark, Antbear, Oryctérope                                                                                                                                                                                       |
| 21   | <i>Felis silvestris</i>       | Wild Cat        | 1376.77                             | Wild Cat, Wildcat, Chat Sauvage, Chat Orné, Gato Montés, Gato Silvestre                                                                                                                                             |
| 22   | <i>Suricata suricatta</i>     | Meerkat         | 1307.15                             | Meerkat, Slender-tailed Meerkat, Suricate                                                                                                                                                                           |
| 23   | <i>Vulpes vulpes</i>          | Red Fox         | 1174.18                             | Red Fox, Silver Fox, Cross Fox, RENARD, Renard Roux, ZORRO, Zorro Rojo                                                                                                                                              |
| 24   | <i>Gorilla gorilla</i>        | Western Gorilla | 1165.4                              | Western Gorilla, Lowland Gorilla, Gorille, Gorila                                                                                                                                                                   |
| 25   | <i>Ailurus fulgens</i>        | Red Panda       | 1139.68                             | Red Panda, Lesser Panda, Red Cat-bear, Panda Éclatant, Petit Panda, Panda Chico, Panda Rojo                                                                                                                         |

S2 Table continued

| Rank | Species                         | Common names               | Average monthly web search interest | All common names                                                                                                                                                                                                                                       |
|------|---------------------------------|----------------------------|-------------------------------------|--------------------------------------------------------------------------------------------------------------------------------------------------------------------------------------------------------------------------------------------------------|
| 26   | <i>Hippopotamus amphibius</i>   | Hippopotamus               | 1069.43                             | Hippopotamus, Large Hippo, Common Hippopotamus, Hippopotame, Hipopótamo Anfíbio                                                                                                                                                                        |
| 27   | <i>Homo sapiens</i>             | Human                      | 922.66                              | Human                                                                                                                                                                                                                                                  |
| 28   | <i>Mustela erminea</i>          | Ermine                     | 892.55                              | Ermine, Stoat, Short-tailed Weasel, Hermine, Armiño                                                                                                                                                                                                    |
| 29   | <i>Ornithorhynchus anatinus</i> | Platypus                   | 859.31                              | Platypus, Duck-billed Platypus, Ornithorynque                                                                                                                                                                                                          |
| 30   | <i>Sarcophilus harrisii</i>     | Tasmanian Devil            | 837.98                              | Tasmanian Devil, Diable De Tasmanie                                                                                                                                                                                                                    |
| 31   | <i>Megaptera novaeangliae</i>   | Humpback Whale             | 768.36                              | Humpback Whale, Hump Whale, Hunchbacked Whale, Bunch, Mégaptère, Baleine à bosse, Baleine à taquet, Jubarte, Rorqual à bosse, Rorqual du Cap, Ballena Jorobada, Gubarte, Jorobada, Rorcual Jorobado                                                    |
| 32   | <i>Cervus elaphus</i>           | Red Deer                   | 760.21                              | Red Deer, Bactrian Wapiti, Bokharan Deer, Bukhara Red Deer, Elk, Bactrian Deer, Wapiti, Bactrian Red Deer, Cerf De Bactriane, Cerf Du Turkestan, Cerf Élaphe, Cerf Élaphe Du Turkestan, Cerf Rouge Du Turkestan, Ciervo, Ciervo Bactriano, Ciervo Rojo |
| 33   | <i>Martes pennanti</i>          | Fisher                     | 720.69                              | Fisher                                                                                                                                                                                                                                                 |
| 34   | <i>Vulpes zerda</i>             | Fennec Fox                 | 694.97                              | Fennec Fox, Fennec                                                                                                                                                                                                                                     |
| 35   | <i>Loxodonta africana</i>       | African Elephant           | 655.46                              | African Elephant, Éléphant d'Afrique, Éléphant Africain, Elefante Africano                                                                                                                                                                             |
| 36   | <i>Canis latrans</i>            | Coyote                     | 653.58                              | Coyote, American Jackal, Brush Wolf, Prairie Wolf                                                                                                                                                                                                      |
| 37   | <i>Physeter macrocephalus</i>   | Sperm Whale                | 651.07                              | Sperm Whale, Spermacet Whale, Cachelot, Pot Whale, Cachalot, Ballena Esperma, Ballena Esperma, Cachalote, Cachalote                                                                                                                                    |
| 38   | <i>Dugong dugon</i>             | Dugong                     | 649.19                              | Dugong, Sea Cow, Dugon                                                                                                                                                                                                                                 |
| 39   | <i>Panthera uncia</i>           | Snow Leopard               | 541.3                               | Snow Leopard, Ounce, Once, Irbis, Léopard des neiges, Panthère des neiges, Leopardo Nival, Pantera de la Nieves                                                                                                                                        |
| 40   | <i>Urocyon cinereoargenteus</i> | Grey Fox                   | 523.11                              | Grey Fox, Tree Fox, Gray Fox, Gato De Monte, Gato Cervan, Zorro, Zorro Gris, Zorro Plateado                                                                                                                                                            |
| 41   | <i>Eubalaena glacialis</i>      | North Atlantic Right Whale | 516.21                              | North Atlantic Right Whale, Northern Right Whale, Right Whale, Black Right Whale, Baleine De Biscaye, Baleine Des Basques, Ballena, Ballena Franca Del Norte, Ballenga                                                                                 |
| 42   | <i>Mustela nivalis</i>          | Least Weasel               | 451.61                              | Least Weasel, Weasel, Belette d'Europe, Comadreja                                                                                                                                                                                                      |
| 43   | <i>Gulo gulo</i>                | Wolverine                  | 436.55                              | Wolverine, GLOUTON, Glouton, Glotón, GLOTÓN                                                                                                                                                                                                            |
| 44   | <i>Canis rufus</i>              | Red Wolf                   | 423.38                              | Red Wolf                                                                                                                                                                                                                                               |
| 45   | <i>Elephas maximus</i>          | Asian Elephant             | 417.48                              | Asian Elephant, Indian Elephant, Éléphant D'Asie, Éléphant D'Inde, Elefante Asiático                                                                                                                                                                   |
| 46   | <i>Nycticebus coucang</i>       | Greater Slow Loris         | 416.88                              | Greater Slow Loris, Sunda Slow Loris, Slow Loris, Loris Lent, Loris Lento                                                                                                                                                                              |
| 47   | <i>Tursiops truncatus</i>       | Common Bottlenose Dolphin  | 411.49                              | Common Bottlenose Dolphin, Bottlenose Dolphin, Bottle-nosed Dolphin, Bottlenosed Dolphin, Grand Dauphin, dauphin souffleur, grand dauphin, Souffleur, Tursiops, Delfin Mular, Pez Mular, Tursión, Tursión                                              |
| 48   | <i>Bubalus arnee</i>            | Asian Buffalo              | 397.11                              | Asian Buffalo, Asiatic Buffalo, Indian Buffalo, Indian Water Buffalo, Water Buffalo, Wild Asian Buffalo, Wild Water Buffalo, Buffle D'Eau, Buffle De L'Inde, Bufalo Arni                                                                               |
| 49   | <i>Enhydra lutris</i>           | Sea Otter                  | 395.91                              | Sea Otter, Loutre De Mer, Nutria Del Kamtchatka, Nutria Marina                                                                                                                                                                                         |

S2 Table continued

| Rank | Species                       | Common names                | Average monthly web search interest | All common names                                                                                                                                                                                                                                                                         |
|------|-------------------------------|-----------------------------|-------------------------------------|------------------------------------------------------------------------------------------------------------------------------------------------------------------------------------------------------------------------------------------------------------------------------------------|
| 50   | <i>Potos flavus</i>           | Kinkajou                    | 334.02                              | Kinkajou, Mico De Noche, Cusu, Martilla, Chosna, Mico León, Mono Michi, Perro De Monte                                                                                                                                                                                                   |
| 51   | <i>Phacochoerus africanus</i> | Common Warthog              | 332.95                              | Common Warthog, Warthog, Eritrean Warthog, Phacochère Commun                                                                                                                                                                                                                             |
| 52   | <i>Martes martes</i>          | European Pine Marten        | 314.3                               | European Pine Marten, Pine Marten, Pine Martin, European Pine Martin, Martre Des Pins, MARTRE DES PINS, Marta, MARTA                                                                                                                                                                     |
| 53   | <i>Sciurus carolinensis</i>   | Eastern Gray Squirrel       | 305.58                              | Eastern Gray Squirrel, Gray Squirrel, Grey Squirrel                                                                                                                                                                                                                                      |
| 54   | <i>Speothos venaticus</i>     | Bush Dog                    | 280.81                              | Bush Dog, Vinegar Dog, Savannah Dog, Chien Des Buissons, Zorro, Perrito Venadero, Cachorro Vinagre, Guanfando, Pero Selvático, Perrito de Monte , Perro de Agua, Perro de la Selva, Perro De Monte, Perro Grullero , Perro Vinagre , Umba, Zorrito Vinagre, Zorro Pitoco , Zorro Vinagre |
| 55   | <i>Heterocephalus glaber</i>  | Naked Mole Rat              | 250.54                              | Naked Mole Rat                                                                                                                                                                                                                                                                           |
| 56   | <i>Equus africanus</i>        | African Wild Ass            | 248.02                              | African Wild Ass, Ass, African Ass, Ane sauvage d'Afrique, Âne Sauvage D'Afrique, Asno Salvaje de Africa                                                                                                                                                                                 |
| 57   | <i>Alopex lagopus</i>         | Arctic Fox                  | 242.86                              | Arctic Fox, Polar Fox, Renard Polaire, Isatis, Reynard Polaire, Zorro Ártico                                                                                                                                                                                                             |
| 58   | <i>Odocoileus hemionus</i>    | Mule Deer                   | 239.31                              | Mule Deer, Black-tailed Deer, Cedros Island Mule Deer, Cedros Island Black-tailed Deer, Bura, Venado Mulo(a)                                                                                                                                                                             |
| 59   | <i>Rangifer tarandus</i>      | Reindeer                    | 236.05                              | Reindeer, Caribou, Peary Caribou, Renne, RENNE, Reno, RENO                                                                                                                                                                                                                               |
| 60   | <i>Antilocapra americana</i>  | Pronghorn                   | 227.7                               | Pronghorn, Mexican Pronghorn, Antilocapre, Antilope Américaine, Berrendo                                                                                                                                                                                                                 |
| 61   | <i>Capreolus capreolus</i>    | European Roe Deer           | 218.06                              | European Roe Deer, Western Roe Deer, Roe Deer, Chevreuil Européen, Chevreuil, CHEVREUIL EUROPÉEN, Corzo, CORZO                                                                                                                                                                           |
| 62   | <i>Alouatta seniculus</i>     | Colombian Red Howler Monkey | 214.6                               | Colombian Red Howler Monkey, Colombian Red Howling Monkey, Mono Araguato, Coto Mono, Mono, Mono Colorado, Mono Cotudo, Roncador                                                                                                                                                          |
| 63   | <i>Eschrichtius robustus</i>  | Gray Whale                  | 202.5                               | Gray Whale, Grey Whale                                                                                                                                                                                                                                                                   |
| 64   | <i>Neofelis nebulosa</i>      | Clouded Leopard             | 195.11                              | Clouded Leopard, Panthère Longibande, Panthère Nébuleuse, Pantera Del Himalaya, Pantera Longibanda, Pantera Nebulosa                                                                                                                                                                     |
| 65   | <i>Mandrillus sphinx</i>      | Mandrill                    | 194.65                              | Mandrill, Mandril                                                                                                                                                                                                                                                                        |
| 66   | <i>Desmodus rotundus</i>      | Common Vampire Bat          | 193.06                              | Common Vampire Bat, Vampire Bat                                                                                                                                                                                                                                                          |
| 67   | <i>Gorilla beringei</i>       | Eastern Gorilla             | 181.76                              | Eastern Gorilla, Mountain Gorilla                                                                                                                                                                                                                                                        |
| 68   | <i>Myrmecobius fasciatus</i>  | Numbat                      | 170                                 | Numbat, Banded Anteater, Fourmilier Marsupial Rayé, Hormiguero Marsupial                                                                                                                                                                                                                 |
| 69   | <i>Dama dama</i>              | Fallow Deer                 | 161.13                              | Fallow Deer, Mesopotamian Fallow Deer, Persian Fallow Deer, FALLOW DEER, Daim Européen, DAIM EUROPÉEN, Gamo, GAMO                                                                                                                                                                        |
| 70   | <i>Hydrurga leptonyx</i>      | Leopard Seal                | 156.7                               | Leopard Seal                                                                                                                                                                                                                                                                             |
| 71   | <i>Vulpes macrotis</i>        | Kit Fox                     | 153.45                              | Kit Fox, Desert Fox, Zorra Del Desierto, Zorra Norteña                                                                                                                                                                                                                                   |
| 72   | <i>Okapia johnstoni</i>       | Okapi                       | 152.27                              | Okapi                                                                                                                                                                                                                                                                                    |
| 73   | <i>Sus scrofa</i>             | Wild Boar                   | 149.61                              | Wild Boar, Eurasian Wild Pig, Ryukyu Islands Wild Pig, Sanglier, Sanglier D'Eurasie, Jabalí                                                                                                                                                                                              |
| 74   | <i>Cebuella pygmaea</i>       | Pygmy Marmoset              | 149.41                              | Pygmy Marmoset, Chambira, Chichico, Leoncillo, Leonzito, Micolãozinho, Mono De Bolsillo, Titi, Titi-pielroja                                                                                                                                                                             |

S2 Table continued

| Rank | Species                           | Common names          | Average monthly web search interest | All common names                                                                                                                                                                                                           |
|------|-----------------------------------|-----------------------|-------------------------------------|----------------------------------------------------------------------------------------------------------------------------------------------------------------------------------------------------------------------------|
| 75   | <i>Macropus robustus</i>          | Common Wallaroo       | 148.35                              | Common Wallaroo, Euro, Barrow Island Euro, Hill Wallaroo                                                                                                                                                                   |
| 76   | <i>Pudu puda</i>                  | Southern Pudu         | 147.16                              | Southern Pudu, Chilean Pudu, Poudou Du Sud, Pudu Du Sud, Ciervo Enano, Pudu, Pudu Meridional, Venadito, Venado                                                                                                             |
| 77   | <i>Macrotis lagotis</i>           | Bilby                 | 146.85                              | Bilby, Greater Rabbit-eared Bandicoot, Greater Bilby, Dalgyte, Grand Bandicoot-lapin, Grand Péramèle-lapin, Cangurito Narigudo Grande                                                                                      |
| 78   | <i>Myrmecophaga tridactyla</i>    | Giant Anteater        | 145.72                              | Giant Anteater, Tamanoir, Grand Fourmilier, Hormiguero Gigante, Oso Caballo, Oso Hormiguero, Oso Palmero                                                                                                                   |
| 79   | <i>Balaenoptera physalus</i>      | Fin Whale             | 145.1                               | Fin Whale, Fin-backed Whale, Finner, Common Rorqual, Herring Whale, Razorback, Finback, Baleine à nageoires, Baleine fin, Baleinoptère commune, Rorqual commun, Rorqual Commun, Ballena Aleta, Ballena Boba, Rorcual Común |
| 80   | <i>Martes foina</i>               | Stone Marten          | 143.96                              | Stone Marten, Beech Marten, Fouine, Garduña                                                                                                                                                                                |
| 81   | <i>Lycaon pictus</i>              | African Wild Dog      | 142.26                              | African Wild Dog, Painted Hunting Dog, Cape Hunting Dog, Cynhyene, Loup-peint, Lycaon, Licaon                                                                                                                              |
| 82   | <i>Odocoileus virginianus</i>     | White-tailed Deer     | 141.44                              | White-tailed Deer, Key Deer, Key Deer Toy Deer, Cariacú, Venado Cola Blanca                                                                                                                                                |
| 83   | <i>Aepyceros melampus</i>         | Impala                | 135.77                              | Impala, Black-faced Impala                                                                                                                                                                                                 |
| 84   | <i>Odobenus rosmarus</i>          | Walrus                | 135.61                              | Walrus, Morse, MORSA                                                                                                                                                                                                       |
| 85   | <i>Sciurus niger</i>              | Bryant's Fox Squirrel | 128.44                              | Bryant's Fox Squirrel, Delmarva Fox Squirrel, Eastern Fox Squirrel, Fox Squirrel                                                                                                                                           |
| 86   | <i>Melursus ursinus</i>           | Sloth Bear            | 128.13                              | Sloth Bear, Ours prochile lippu, Ours lippu de l'Inde, Oso Perezoso                                                                                                                                                        |
| 87   | <i>Inia geoffrensis</i>           | Boto                  | 128.08                              | Boto, Pink River Dolphin, Boutu, Amazon River Dolphin, Dauphin De L'Amazone, nia, Bufoe                                                                                                                                    |
| 88   | <i>Macropus rufus</i>             | Red Kangaroo          | 127.93                              | Red Kangaroo                                                                                                                                                                                                               |
| 89   | <i>Arctictis binturong</i>        | Binturong             | 120.81                              | Binturong, Bearcat, Palawan Binturong                                                                                                                                                                                      |
| 90   | <i>Chrysocyon brachyurus</i>      | Maned Wolf            | 114.37                              | Maned Wolf, Loup À Crinière, Aguara Guazu, Borochi, Lobo De Crin                                                                                                                                                           |
| 91   | <i>Leopardus pardalis</i>         | Ocelot                | 113.54                              | Ocelot, Manigordo, Gato Onza, Ocelote, Tigrillo                                                                                                                                                                            |
| 92   | <i>Rattus rattus</i>              | House Rat             | 111.17                              | House Rat, Ship Rat, Roof Rat, Black Rat, Rat Noir, Rata Negra                                                                                                                                                             |
| 93   | <i>Tremarctos ornatus</i>         | Spectacled Bear       | 109.98                              | Spectacled Bear, Andean Bear, Ours Andin, Ours à lunettes, Oso de Anteojos, Oso Frontino, Oso Real                                                                                                                         |
| 94   | <i>Ondatra zibethicus</i>         | Muskrat               | 108.54                              | Muskrat                                                                                                                                                                                                                    |
| 95   | <i>Balaenoptera acutorostrata</i> | Common Minke Whale    | 106.22                              | Common Minke Whale, Minke Whale, Lesser Rorqual, Little Piked Whale, Dwarf Minke Whale, Baleinoptère à museau pointu, Petit rorqual, Ballena Minke, Rorcual Menor                                                          |
| 96   | <i>Helarctos malayanus</i>        | Sun Bear              | 104.62                              | Sun Bear, Malayan Sun Bear, Ours Malais, Ours des cocotiers, Oso de Sol, Oso Malayo                                                                                                                                        |
| 97   | <i>Tamandua mexicana</i>          | Northern Tamandua     | 102.92                              | Northern Tamandua, Oso Melero, Oso Hormiguero, Oso Mielero, Tamandua                                                                                                                                                       |
| 98   | <i>Pagophilus groenlandicus</i>   | Harp Seal             | 102.66                              | Harp Seal, Greenland Seal, FOCA PÍA                                                                                                                                                                                        |
| 99   | <i>Diceros bicornis</i>           | Black Rhinoceros      | 99.38                               | Black Rhinoceros, Hook-lipped Rhinoceros, Rhinocéros noir, Rinoceronte Negro                                                                                                                                               |
| 100  | <i>Cervus nippon</i>              | Sika Deer             | 97.87                               | Sika Deer, Sika, Shansi Sika                                                                                                                                                                                               |
