# Supplementary material for: Popular interest in vertebrates does not reflect extinction risk and is associated with bias in conservation investment
Source: PubMed Central journal article supplement (PMC6157853; doi:10.1371/journal.pone.0203694), 2018-09-26
Supplement: pone.0203694.s004.pdf [file pone.0203694.s004.pdf]

**S3 Table. The top 100 most Googled reptiles in the world.** Data corresponding to Figure 2c.

| Rank | Species                           | Common names                | Average monthly web search interest | All common names                                                                                                                                                                                                                                       |
|------|-----------------------------------|-----------------------------|-------------------------------------|--------------------------------------------------------------------------------------------------------------------------------------------------------------------------------------------------------------------------------------------------------|
| 1    | <i>Dermochelys coriacea</i>       | Leatherback                 | 522.48                              | Leatherback, Leatherback Sea Turtle, Leathery Turtle, Luth, Trunkback Turtle, Trunk Turtle, Coffin-back, Tortue luth, Cardon, Baula, Canal, Dorso de Cuero, Galapagos, Siete Lomos, Siete Quillas, Tinglada, Tinglar, Tora, Tortuga Caná, Tortuga Laud |
| 2    | <i>Ophiophagus hannah</i>         | King Cobra                  | 481.09                              | King Cobra, Hamadryad                                                                                                                                                                                                                                  |
| 3    | <i>Plestiodon tetragrammus</i>    | Four-lined Skink            | 275.45                              | Four-lined Skink, Escorpion De Cola Azul, Lince                                                                                                                                                                                                        |
| 4    | <i>Heloderma suspectum</i>        | Gila Monster                | 253.26                              | Gila Monster, Lézard perlé, Monstre de gila, Monstruo de Gila                                                                                                                                                                                          |
| 5    | <i>Storeria dekayi</i>            | Brownsnake                  | 167.68                              | Brownsnake, Brown Snake                                                                                                                                                                                                                                |
| 6    | <i>Caretta caretta</i>            | Loggerhead                  | 155.36                              | Loggerhead, Tortue Caouanne, Caouanne, Cayuma, Tortuga Boba                                                                                                                                                                                            |
| 7    | <i>Chelonia mydas</i>             | Green Turtle                | 147.73                              | Green Turtle, Tortue verte, Tortue franche, Tortue comestible, Tortuga Blanca, Tortuga Verde                                                                                                                                                           |
| 8    | <i>Dendroaspis polylepis</i>      | Black Mamba                 | 143.09                              | Black Mamba                                                                                                                                                                                                                                            |
| 9    | <i>Vipera berus</i>               | Adder                       | 143.09                              | Adder                                                                                                                                                                                                                                                  |
| 10   | <i>Varanus komodoensis</i>        | Komodo Dragon               | 135.04                              | Komodo Dragon, Komodo Monitor, Ora, Dragon Des Komodos, Varan De Komodo, Varano De Komodo                                                                                                                                                              |
| 11   | <i>Coluber constrictor</i>        | Eastern Racer               | 125.92                              | Eastern Racer, Racer                                                                                                                                                                                                                                   |
| 12   | <i>Crocodylus acutus</i>          | American Crocodile          | 121.64                              | American Crocodile, Crocodile d'Amérique, Crocodile Americain, Cocodrilo Americano, Caiman, Caiman de costa, Caiman aguja, Cocodrilo de Río, Lagarto Amarillo, Lagarto Real                                                                            |
| 13   | <i>Agkistrodon piscivorus</i>     | Cottonmouth                 | 114.62                              | Cottonmouth                                                                                                                                                                                                                                            |
| 14   | <i>Natrix natrix</i>              | Grass Snake                 | 87.24                               | Grass Snake, Couleuvre à collier, Culebra de Collar                                                                                                                                                                                                    |
| 15   | <i>Alligator mississippiensis</i> | American Alligator          | 83.43                               | American Alligator, Mississippi Alligator                                                                                                                                                                                                              |
| 16   | <i>Hypsirhynchus ater</i>         | Black Racer                 | 82.62                               | Black Racer                                                                                                                                                                                                                                            |
| 17   | <i>Diadophis punctatus</i>        | Ring-necked Snake           | 79.16                               | Ring-necked Snake, Ringneck Snake                                                                                                                                                                                                                      |
| 18   | <i>Crocodylus niloticus</i>       | Nile Crocodile              | 77.14                               | Nile Crocodile                                                                                                                                                                                                                                         |
| 19   | <i>Chlamydosaurus kingii</i>      | Frilled Lizard              | 72.32                               | Frilled Lizard                                                                                                                                                                                                                                         |
| 20   | <i>Epicrates subflavus</i>        | Jamaican Boa                | 60.55                               | Jamaican Boa, Yellow Snake, Boa De La Jamaïque, Boa De Jamaica                                                                                                                                                                                         |
| 21   | <i>Chelydra serpentina</i>        | Snapping Turtle             | 55.17                               | Snapping Turtle, North American Snapping Turtle, Common Snapping Turtle                                                                                                                                                                                |
| 22   | <i>Podocnemis expansa</i>         | South American River Turtle | 55.12                               | South American River Turtle, Arrau, Giant South American Turtle, Tartaruga, Podocnémeide Élargie                                                                                                                                                       |
| 23   | <i>Gavialis gangeticus</i>        | Gharial                     | 48.01                               | Gharial, Indian Gharial, Fish-eating Crocodile, Indian Gavial, Gavial, Long-nosed Crocodile, Gavial du Gange, Gavial del Ganges                                                                                                                        |
| 24   | <i>Sphenodon punctatus</i>        | Beak-head                   | 40.49                               | Beak-head, Cook Strait Tuatara, Sphenodon, Tuatara, Hatteria Ponctué, Sphénodon Ponctué, Tuátara                                                                                                                                                       |

S3 Table continued

| Rank | Species                         | Common names                       | Average monthly        | All common names                                                                                                                                                                                                                             |
|------|---------------------------------|------------------------------------|------------------------|----------------------------------------------------------------------------------------------------------------------------------------------------------------------------------------------------------------------------------------------|
|      |                                 |                                    | web search<br>interest |                                                                                                                                                                                                                                              |
| 25   | <i>Sistrurus catenatus</i>      | Massasauga                         | 40.43                  | Massasauga                                                                                                                                                                                                                                   |
| 26   | <i>Terrapene carolina</i>       | Eastern Box Turtle                 | 36.43                  | Eastern Box Turtle, Mexican Box Turtle, American Box Turtle, Common Box Turtle, Yucatan Box Turtle, Tortue-boîte de Caroline                                                                                                                 |
| 27   | <i>Pantherophis guttatus</i>    | Corn Snake                         | 35.95                  | Corn Snake, Red Cornsnake                                                                                                                                                                                                                    |
| 28   | <i>Thelotornis capensis</i>     | Bird Snake                         | 34.1                   | Bird Snake, Twig Snake, Vine Snake                                                                                                                                                                                                           |
| 29   | <i>Eretmochelys imbricata</i>   | Hawksbill Turtle                   | 32.78                  | Hawksbill Turtle, Tortue à écailles, Tortue à bec faucon, Caret, Tortue Caret, Tortue imbriquée, Tortuga de Carey                                                                                                                            |
| 30   | <i>Pituophis catenifer</i>      | Bullsnake                          | 32.11                  | Bullsnake, Gophersnake, Gopher Snake                                                                                                                                                                                                         |
| 31   | <i>Morelia spilota</i>          | Carpet Python                      | 32.05                  | Carpet Python, Diamond Python, Western Australian Carpet Python                                                                                                                                                                              |
| 32   | <i>Lepidochelys olivacea</i>    | Olive Ridley                       | 30.32                  | Olive Ridley, Pacific Ridley, Ridley du Pacifique, Tortue Bâtarde, Tortue de Ridley, Tortue Olivâtre, Tortuga Golfina, Tortuga Carpintera, Tortuga Guaraguá, Tortuga Lora, Tortuga Manila, Tortuga Mulato, Tortuga Olivacea, Tortuga Parlama |
| 33   | <i>Trachemys scripta</i>        | Yellow-bellied Slider Turtle       | 30.15                  | Yellow-bellied Slider Turtle, Red-eared Slider Turtle, Cumberland Slider Turtle, Slider, Common Slider                                                                                                                                       |
| 34   | <i>Heloderma horridum</i>       | Beaded Lizard                      | 29.52                  | Beaded Lizard, Héloderme granuleux, Héloderme horrible, Escorpión, Lagarto de Cuentas                                                                                                                                                        |
| 35   | <i>Crocodylus porosus</i>       | Salt-water Crocodile               | 28.97                  | Salt-water Crocodile, Estuarine Crocodile, Crocodile d'estuaire, Crocodile marin, Cocodrilo Poroso                                                                                                                                           |
| 36   | <i>Pituophis melanoleucus</i>   | Pinesnake                          | 28.66                  | Pinesnake, Pine Snake                                                                                                                                                                                                                        |
| 37   | <i>Morelia viridis</i>          | Green Python                       | 27.79                  | Green Python, Green Tree Python                                                                                                                                                                                                              |
| 38   | <i>Drymarchon couperi</i>       | Eastern Indigo Snake               | 27.4                   | Eastern Indigo Snake                                                                                                                                                                                                                         |
| 39   | <i>Malaclemys terrapin</i>      | Diamondback Terrapin               | 27.09                  | Diamondback Terrapin, Terrapin                                                                                                                                                                                                               |
| 40   | <i>Crotalus adamanteus</i>      | Eastern Diamond-backed Rattlesnake | 25.43                  | Eastern Diamond-backed Rattlesnake, Eastern Diamondback Rattlesnake                                                                                                                                                                          |
| 41   | <i>Ctenosaura defensor</i>      | Yucatán Spiny-tailed Iguana        | 25.42                  | Yucatán Spiny-tailed Iguana, Chop                                                                                                                                                                                                            |
| 42   | <i>Opheodrys aestivus</i>       | Greensnake                         | 25.24                  | Greensnake, Rough Greensnake, Rough Green Snake                                                                                                                                                                                              |
| 43   | <i>Melanosuchus niger</i>       | Black Caiman                       | 24.4                   | Black Caiman, Caïman noir, Caimán Negro, Lagarto Negro                                                                                                                                                                                       |
| 44   | <i>Regina septemvittata</i>     | Queen Snake                        | 24.24                  | Queen Snake                                                                                                                                                                                                                                  |
| 45   | <i>Glyptemys insculpta</i>      | Wood Turtle                        | 24.11                  | Wood Turtle, Clemmyde Sculptée                                                                                                                                                                                                               |
| 46   | <i>Thamnophis sirtalis</i>      | San Francisco Garter Snake         | 24.05                  | San Francisco Garter Snake                                                                                                                                                                                                                   |
| 47   | <i>Philothamnus irregularis</i> | Common Bush Snake                  | 23.92                  | Common Bush Snake, Green Tree Snake, Irregular Green Snake, Northern Green Bush Snake                                                                                                                                                        |
| 48   | <i>Dendrelaphis calligastra</i> | Coconut Tree Snake                 | 23.86                  | Coconut Tree Snake, Green Tree Snake, Northern Tree Snake                                                                                                                                                                                    |
| 50   | <i>Crotalus atrox</i>           | Western Diamond-backed Rattlesnake | 23.54                  | Western Diamond-backed Rattlesnake, Western Diamondback Rattlesnake                                                                                                                                                                          |
| 49   | <i>Sistrurus miliarius</i>      | Pygmy Rattlesnake                  | 23.76                  | Pygmy Rattlesnake                                                                                                                                                                                                                            |

S3 Table continued

| Rank | Species                       | Common names              | Average monthly     | All common names                                                                                                                                                           |
|------|-------------------------------|---------------------------|---------------------|----------------------------------------------------------------------------------------------------------------------------------------------------------------------------|
|      |                               |                           | web search interest |                                                                                                                                                                            |
| 51   | <i>Agkistrodon bilineatus</i> | Cantil                    | 22.5                | Cantil, Castellana                                                                                                                                                         |
| 52   | <i>Pseudemydura umbrina</i>   | Western Swamp Tortoise    | 22.49               | Western Swamp Tortoise, Western Swamp Turtle, Short-necked Tortoise, Western Short-necked Turtle, Pseudémydure de Perth, Tortue à col court, Tortuga Serpentina Occidental |
| 53   | <i>Lepidochelys kempii</i>    | Kemp's Ridley             | 21.93               | Kemp's Ridley, Atlantic Ridley, Mexican Ridley, Gulf Ridley, Ridley de Kemp, Lépidochelyde de Kemp, Tortue de Kemp, Cotorra, Tortuga Iora, Tortuga Marina Bastarda         |
| 54   | <i>Alligator sinensis</i>     | Chinese Alligator         | 21.85               | Chinese Alligator, China Alligator, Alligator de Chine, Aligator de China                                                                                                  |
| 55   | <i>Thamnophis sauritus</i>    | Eastern Ribbonsnake       | 21.24               | Eastern Ribbonsnake, Eastern Ribbon Snake                                                                                                                                  |
| 56   | <i>Crotalus horridus</i>      | Timber Rattlesnake        | 21.24               | Timber Rattlesnake                                                                                                                                                         |
| 57   | <i>Heterodon platirhinus</i>  | Eastern Hog-nosed Snake   | 20.34               | Eastern Hog-nosed Snake, Eastern Hognose Snake                                                                                                                             |
| 58   | <i>Farancia abacura</i>       | Mud Snake                 | 19.47               | Mud Snake, Red-bellied Mudsake                                                                                                                                             |
| 59   | <i>Crotalus scutulatus</i>    | Mohave Rattlesnake        | 19.36               | Mohave Rattlesnake, Mojave Rattlesnake                                                                                                                                     |
| 60   | <i>Crotalus cerastes</i>      | Sidewinder                | 19.12               | Sidewinder                                                                                                                                                                 |
| 61   | <i>Caiman crocodilus</i>      | Common Caiman             | 19.05               | Common Caiman, Spectacled Caiman                                                                                                                                           |
| 62   | <i>Macrochelys temminckii</i> | Alligator Snapping Turtle | 18.88               | Alligator Snapping Turtle                                                                                                                                                  |
| 63   | <i>Liochlorophis vernalis</i> | Smooth Greensnake         | 18.87               | Smooth Greensnake, Smooth Green Snake                                                                                                                                      |
| 64   | <i>Hypnale nepa</i>           | Sri Lanka Humpnose Viper  | 18.62               | Sri Lanka Humpnose Viper , Geckos, Gloyd's Hump-nosed Viper, Wall's Humpnose Viper                                                                                         |
| 65   | <i>Phrynosoma cornutum</i>    | Texas Horned Lizard       | 18.44               | Texas Horned Lizard                                                                                                                                                        |
| 66   | <i>Cantoria annulata</i>      | Banded Watersnake         | 18.23               | Banded Watersnake, Banded Water Snake                                                                                                                                      |
| 67   | <i>Zootoca vivipara</i>       | Common Lizard             | 17.03               | Common Lizard, Viviparous Lizard, Lagartija de Turbera                                                                                                                     |
| 68   | <i>Naja kaouthia</i>          | Monocled Cobra            | 16.73               | Monocled Cobra, Monocellate Cibra                                                                                                                                          |
| 69   | <i>Bothropoides insularis</i> | Golden Lancehead          | 16.53               | Golden Lancehead, Queimada Island Bothrops                                                                                                                                 |
| 70   | <i>Lacerta agilis</i>         | Sand Lizard               | 16.13               | Sand Lizard, Lezard des Souches, Lagarto Ágil                                                                                                                              |
| 71   | <i>Crocodylus palustris</i>   | Mugger                    | 16                  | Mugger, Muggar, Broad-snouted Crocodile, Marsh Crocodile, Crocodile des Marais, Crocodile paludéen, Crocodile palustre, Cocodrilo del Marjal, Cocodrilo Marismeyño         |
| 72   | <i>Nerodia sipedon</i>        | Lake Erie Water Snake     | 15.92               | Lake Erie Water Snake                                                                                                                                                      |
| 73   | <i>Gopherus agassizii</i>     | Desert Tortoise           | 15.44               | Desert Tortoise, Tortue D'Agassiz, Gophère D'Agassiz, Tortuga Del Desierto                                                                                                 |
| 74   | <i>Crocodylus rhombifer</i>   | Cuban Crocodile           | 15.41               | Cuban Crocodile, Crocodile de Cuba, Cocodrilo de Cuba                                                                                                                      |
| 75   | <i>Enhydrina schistosa</i>    | Beaked Sea Snake          | 15.26               | Beaked Sea Snake, Enhydrine Ardoisee                                                                                                                                       |

S3 Table continued

| Rank | Species                            | Common names                      | Average monthly     | All common names                                                                                                                                                                                            |
|------|------------------------------------|-----------------------------------|---------------------|-------------------------------------------------------------------------------------------------------------------------------------------------------------------------------------------------------------|
|      |                                    |                                   | web search interest |                                                                                                                                                                                                             |
| 76   | <i>Crotalus viridis</i>            | Prairie Rattlesnake               | 15.2                | Prairie Rattlesnake                                                                                                                                                                                         |
| 77   | <i>Natator depressus</i>           | Flatback                          | 14.65               | Flatback, Tortue marine à dos plat, Chelonée à dos plat, Tortuga Franca Oriental                                                                                                                            |
| 78   | <i>Python regius</i>               | Ball Python                       | 14.14               | Ball Python, Royal Python, Python Royal                                                                                                                                                                     |
| 79   | <i>Cemophora coccinea</i>          | Scarletsnake                      | 14                  | Scarletsnake, Scarlet Snake                                                                                                                                                                                 |
| 80   | <i>Thamnophis marcianus</i>        | Checkered Gartersnake             | 13.66               | Checkered Gartersnake, Checkered Garter Snake                                                                                                                                                               |
| 81   | <i>Hemachatus haemachatus</i>      | Ringhals                          | 13.6                | Ringhals, Ring-necked Spitting Cobra, Rinkhals, Sépédon Hémachate                                                                                                                                           |
| 82   | <i>Agkistrodon contortrix</i>      | Northern Copperhead               | 12.91               | Northern Copperhead                                                                                                                                                                                         |
| 83   | <i>Chrysemys picta</i>             | Painted Turtle                    | 12.47               | Painted Turtle                                                                                                                                                                                              |
| 84   | <i>Bitis rhinoceros</i>            | Rhinoceros Viper                  | 12.01               | Rhinoceros Viper, Western Gaboon Adder, West African Gaboon Viper, West African Gaboon Adder, Western Gaboon Viper, Vipère du Gabon de l'Ouest                                                              |
| 85   | <i>Nerodia rhombifer</i>           | Diamond-backed Watersnake         | 11.94               | Diamond-backed Watersnake, Diamondback Water Snake, Culebra De Agua De Diamantes                                                                                                                            |
| 86   | <i>Cyrtodactylus louisianensis</i> | Ring-tailed Gecko                 | 11.89               | Ring-tailed Gecko, Banded Gecko                                                                                                                                                                             |
| 87   | <i>Amblyrhynchus cristatus</i>     | Fernandina Marine Iguana          | 11.77               | Fernandina Marine Iguana, Sea Iguana, Galápagos Marine Iguana, Marine Iguana, Galapagos Marine Iguana, Amblyrhynche à crête, Iguane marin, Iguana Marina                                                    |
| 88   | <i>Farancia erythrogramma</i>      | Rainbow Snake                     | 11.7                | Rainbow Snake                                                                                                                                                                                               |
| 89   | <i>Aspidites ramsayi</i>           | Ramsay's Python                   | 11.65               | Ramsay's Python, Woma, Python De Ramsay, Pitón De Ramsay                                                                                                                                                    |
| 90   | <i>Lampropeltis getula</i>         | Common Kingsnake                  | 11.59               | Common Kingsnake                                                                                                                                                                                            |
| 91   | <i>Ctenosaura flavidorsalis</i>    | Yellow-backed Spiny-tailed Iguana | 11.51               | Yellow-backed Spiny-tailed Iguana, Rumia                                                                                                                                                                    |
| 92   | <i>Acrochordus javanicus</i>       | Elephant Trunk Snake              | 11.12               | Elephant Trunk Snake, Javan File Snake, Elephant's Trunk Snake, Javan Wart Snake                                                                                                                            |
| 93   | <i>Charina bottae</i>              | Rubber Boa                        | 11.06               | Rubber Boa, Southern Rubber Boa                                                                                                                                                                             |
| 94   | <i>Lichanura trivirgata</i>        | Rosy Boa                          | 10.59               | Rosy Boa                                                                                                                                                                                                    |
| 95   | <i>Crocodylus intermedius</i>      | Orinoco Crocodile                 | 10.1                | Orinoco Crocodile, Crocodile de l'Orénoque, Cocodrilo del Orinoco                                                                                                                                           |
| 96   | <i>Storeria occipitomaculata</i>   | Red-bellied Snake                 | 9.97                | Red-bellied Snake, Redbelly Snake                                                                                                                                                                           |
| 97   | <i>Crocodylus johnsoni</i>         | Australian Freshwater Crocodile   | 8.53                | Australian Freshwater Crocodile, Johnson's Crocodile, Freshie, Johnstone's Crocodile, Johnston's Crocodile                                                                                                  |
| 98   | <i>Fordonia leucobalia</i>         | Crab-eating Snake                 | 8.11                | Crab-eating Snake, Crab-eating Water Snake, Fordon's Water Snake, Mangrove Snake, The Fordonia, The Plain Fordonia, White-bellied Freshwater Snake, White-bellied Mangrove Snake, White-bellied Water Snake |
| 99   | <i>Coelognathus flavolineatus</i>  | Yellow-striped Trinket Snake      | 7.36                | Yellow-striped Trinket Snake, Yellow striped Snake, Black Copper Rat Snake                                                                                                                                  |
| 100  | <i>Bothropoides lutzi</i>          | Cerrado Lancehead                 | 6.64                | Cerrado Lancehead, Boca de Sapo                                                                                                                                                                             |
