# Supplementary material for: Popular interest in vertebrates does not reflect extinction risk and is associated with bias in conservation investment
Source: PubMed Central journal article supplement (PMC6157853; doi:10.1371/journal.pone.0203694), 2018-09-26
Supplement: pone.0203694.s006.pdf [file pone.0203694.s006.pdf]

**S5 Table. The top 52 most Googled amphibians in the world.** Data corresponding to Figure 2e. Note that Google Trends only returned data for 52 species that were not omitted from the analysis. The remaining species had insufficient search volume and average monthly web search interest was therefore scored as 0.

| Rank | Species                        | Common names             | Average monthly web search interest | All common names                                                                            |
|------|--------------------------------|--------------------------|-------------------------------------|---------------------------------------------------------------------------------------------|
| 1    | <i>Litoria caerulea</i>        | Green Tree Frog          | 110.81                              | Green Tree Frog                                                                             |
| 2    | <i>Ambystoma tigrinum</i>      | Tiger Salamander         | 86.37                               | Tiger Salamander,Salamandra                                                                 |
| 3    | <i>Ambystoma velasci</i>       | Plateau Tiger Salamander | 56.05                               | Plateau Tiger Salamander,Salamandra                                                         |
| 4    | <i>Necturus maculosus</i>      | Mudpuppy                 | 54.97                               | Mudpuppy                                                                                    |
| 5    | <i>Rhinella marina</i>         | Cane Toad                | 41.23                               | Cane Toad,Marine Toad,Giant Toad,Giant Marine Toad,Crapaud,Sapo Común,Sapo Grande           |
| 6    | <i>Megophrys nasuta</i>        | Borneon Horned Frog      | 37.61                               | Borneon Horned Frog,Horned Toad,Large Horned Frog,Malayan Horned Frog                       |
| 7    | <i>Conraua goliath</i>         | Giant Slippery Frog      | 37.33                               | Giant Slippery Frog,Goliath Frog                                                            |
| 8    | <i>Litoria aurea</i>           | Golden Bell Frog         | 31.19                               | Golden Bell Frog,Green and Golden Bell Frog,Green and Golden Swamp Frog,Green Frog          |
| 9    | <i>Lithobates sylvaticus</i>   | Wood Frog                | 30.04                               | Wood Frog                                                                                   |
| 10   | <i>Litoria chloris</i>         | Red-eyed Green Treefrog  | 28.44                               | Red-eyed Green Treefrog,Red-eyed Tree Frog,Southern Orange-eyed Tree Frog                   |
| 11   | <i>Triturus cristatus</i>      | Great Crested Newt       | 27.51                               | Great Crested Newt,Northern Crested Newt                                                    |
| 12   | <i>Andrias davidianus</i>      | Chinese Giant Salamander | 27.19                               | Chinese Giant Salamander                                                                    |
| 13   | <i>Pseudacris crucifer</i>     | Spring Peeper            | 26.93                               | Spring Peeper                                                                               |
| 14   | <i>Dyscophus antongilii</i>    | Tomato Frog              | 24.88                               | Tomato Frog                                                                                 |
| 15   | <i>Lithobates catesbeianus</i> | American Bullfrog        | 24.35                               | American Bullfrog,Bullfrog,Common Bullfrog,Grenouille-taureau,Rana Toro                     |
| 16   | <i>Pseudophryne corroboree</i> | Corroboree Frog          | 23.89                               | Corroboree Frog                                                                             |
| 17   | <i>Hylarana daemeli</i>        | Water Frog               | 23.51                               | Water Frog,Wood Frog                                                                        |
| 18   | <i>Litoria moorei</i>          | Bell Frog                | 23.22                               | Bell Frog,Moore's Frog,Motorbike Frog,Western Green And Golden Bell Frog                    |
| 19   | <i>Hylarana erythraea</i>      | Common Green Frog        | 22.3                                | Common Green Frog,Green Paddy Frog,Leaf Frog,Red-eared Frog                                 |
| 20   | <i>Hyla cinerea</i>            | Green Treefrog           | 22.24                               | Green Treefrog                                                                              |
| 21   | <i>Atelopus zeteki</i>         | Golden Arrow Poison Frog | 21.85                               | Golden Arrow Poison Frog,Golden Frog,Panamanian Golden Frog,Zetek's Golden Frog,Rana Dorada |
| 22   | <i>Lithobates clamitans</i>    | Green Frog               | 21.11                               | Green Frog                                                                                  |
| 23   | <i>Litoria ewingii</i>         | Brown Tree Frog          | 20.52                               | Brown Tree Frog,Ewing's Tree Frog,Southern Brown,Whistling Tree Frog                        |
| 24   | <i>Pseudotriton ruber</i>      | Red Salamander           | 20.25                               | Red Salamander                                                                              |
| 25   | <i>Lithobates pipiens</i>      | Northern Leopard Frog    | 18.75                               | Northern Leopard Frog                                                                       |
| 26   | <i>Phrynomantis aspera</i>     | Asian Giant Toad         | 18.29                               | Asian Giant Toad,River Toad,Rough Toad                                                      |
| 27   | <i>Fejervarya limnocharis</i>  | Asian Grass Frog         | 17.4                                | Asian Grass Frog,Common Pond Frog,Field Frog,Grass Frog,Indian Rice Frog                    |

S5 Table continued

| Rank | Species                             | Common names           | Average monthly web search interest | All common names                                                                   |
|------|-------------------------------------|------------------------|-------------------------------------|------------------------------------------------------------------------------------|
| 28   | <i>Proteus anguinus</i>             | Olm                    | 16.63                               | Olm,Proteus                                                                        |
| 29   | <i>Incilius alvarius</i>            | Colorado River Toad    | 16.44                               | Colorado River Toad                                                                |
| 30   | <i>Phyllobates terribilis</i>       | Golden Poison Frog     | 15.65                               | Golden Poison Frog                                                                 |
| 31   | <i>Salamandra salamandra</i>        | Common Fire Salamander | 15.57                               | Common Fire Salamander,Fire Salamander,Salamandra Común                            |
| 32   | <i>Physalaemus fischeri</i>         | Oe                     | 15.22                               | Oe                                                                                 |
| 33   | <i>Cryptobranchus alleganiensis</i> | Hellbender             | 15.07                               | Hellbender                                                                         |
| 34   | <i>Trichobatrachus robustus</i>     | Hairy Frog             | 14.65                               | Hairy Frog                                                                         |
| 35   | <i>Limnonectes blythii</i>          | Blyth's River Frog     | 13.92                               | Blyth's River Frog,Giant Asian River Frog,Giant Frog                               |
| 36   | <i>Hylarana nicobariensis</i>       | Cricket Frog           | 13.83                               | Cricket Frog,Nicobar Cricket Frog,Nicobarese Frog,Nicobar Frog,Nicobar Island Frog |
| 37   | <i>Austrochaperina pluvialis</i>    | Rain Frog              | 13.78                               | Rain Frog                                                                          |
| 38   | <i>Epidalea calamita</i>            | Natterjack Toad        | 13.71                               | Natterjack Toad,Sapo Corredor                                                      |
| 39   | <i>Agalychnis callidryas</i>        | Red-eyed Treefrog      | 13.54                               | Red-eyed Treefrog,Rana Arboricola                                                  |
| 40   | <i>Megophrys montana</i>            | Horned Frog            | 13.54                               | Horned Frog,Javan Horned Frog                                                      |
| 41   | <i>Litoria nasuta</i>               | Rocket Frog            | 13.39                               | Rocket Frog                                                                        |
| 42   | <i>Litoria australis</i>            | Giant Frog             | 12.6                                | Giant Frog                                                                         |
| 43   | <i>Pelophylax lateralis</i>         | Kokarit Frog           | 12.23                               | Kokarit Frog,Yellow Frog                                                           |
| 44   | <i>Eurycea lucifuga</i>             | Cave Salamander        | 12.04                               | Cave Salamander                                                                    |
| 45   | <i>Aneides flavipunctatus</i>       | Black Salamander       | 11.47                               | Black Salamander                                                                   |
| 46   | <i>Pyxicephalus adspersus</i>       | African Bullfrog       | 10.59                               | African Bullfrog                                                                   |
| 47   | <i>Anaxyrus americanus</i>          | American Toad          | 10.58                               | American Toad                                                                      |
| 48   | <i>Limnodynastes peronii</i>        | Brown Frog             | 10.13                               | Brown Frog,Perons Marsh Frog,Striped Marsh Frog                                    |
| 49   | <i>Rhinella schneideri</i>          | Cururu Toad            | 9.99                                | Cururu Toad,Cururú,Rococo                                                          |
| 50   | <i>Telmatobius niger</i>            | UCO                    | 9.74                                | UCO                                                                                |
| 51   | <i>Atelopus varius</i>              | Harlequin Frog         | 9.59                                | Harlequin Frog,Rana Arlequin                                                       |
| 52   | <i>Bufo bufo</i>                    | Common Toad            | 8.34                                | Common Toad,Crapaud Commun,Crapaud Vulgaire,Sapo Común                             |
