# Supplementary material for: Popular interest in vertebrates does not reflect extinction risk and is associated with bias in conservation investment
Source: PubMed Central journal article supplement (PMC6157853; doi:10.1371/journal.pone.0203694), 2018-09-26
Supplement: pone.0203694.s007.pdf [file pone.0203694.s007.pdf]

**S6 Table. The top 100 most Googled birds in the world.** Data corresponding to Figure 2f

| Rank | Species                         | Common names            | Average monthly web serach interest | All common names                                                                     |
|------|---------------------------------|-------------------------|-------------------------------------|--------------------------------------------------------------------------------------|
| 1    | <i>Haliaeetus leucocephalus</i> | Bald Eagle              | 1670.95                             | Bald Eagle                                                                           |
| 2    | <i>Campephilus principalis</i>  | Ivory-billed Woodpecker | 1421.69                             | Ivory-billed Woodpecker                                                              |
| 3    | <i>Falco peregrinus</i>         | Peregrine Falcon        | 1166.65                             | Peregrine Falcon,Peregrine,Faucon pèlerin                                            |
| 4    | <i>Dacelo novaeguineae</i>      | Laughing Kookaburra     | 802.86                              | Laughing Kookaburra,Kookaburra                                                       |
| 5    | <i>Coturnix coturnix</i>        | Common Quail            | 798.47                              | Common Quail,Quail,Caille des blés                                                   |
| 6    | <i>Dromaius novaehollandiae</i> | Emu                     | 704.38                              | Emu                                                                                  |
| 7    | <i>Erithacus rubecula</i>       | European Robin          | 696.85                              | European Robin,Robin,Rougegorge                                                      |
| 8    | <i>Cuculus canorus</i>          | Common Cuckoo           | 662.36                              | Common Cuckoo,European Cuckoo,Cuckoo,Coucou gris                                     |
| 9    | <i>Tyto alba</i>                | Barn Owl                | 606.53                              | Barn Owl,Chouette effraie                                                            |
| 10   | <i>Aptenodytes forsteri</i>     | Emperor Penguin         | 585.83                              | Emperor Penguin                                                                      |
| 11   | <i>Struthio camelus</i>         | Ostrich                 | 501.79                              | Ostrich,Common Ostrich,Autruche                                                      |
| 12   | <i>Pandion haliaetus</i>        | Osprey                  | 355.33                              | Osprey,Balbuzard pêcheur                                                             |
| 13   | <i>Fratercula arctica</i>       | Atlantic Puffin         | 333.66                              | Atlantic Puffin,Puffin                                                               |
| 14   | <i>Aquila chrysaetos</i>        | Golden Eagle            | 326.06                              | Golden Eagle,Aigle royal                                                             |
| 15   | <i>Anas platyrhynchos</i>       | Mallard                 | 268.05                              | Mallard,Northern Mallard,Common Mallard,Canard colvert                               |
| 16   | <i>Psittirostra psittacea</i>   | Ou                      | 264.78                              | Ou,'O'u                                                                              |
| 17   | <i>Harpia harpyja</i>           | Harpy Eagle             | 254.4                               | Harpy Eagle,American Harpy Eagle,Aguila Harpía,Aguila Arpía,Arpía,Arpía Mayor,Harpía |
| 18   | <i>Meleagris gallopavo</i>      | Wild Turkey             | 221.77                              | Wild Turkey,Turkey                                                                   |
| 19   | <i>Eudyptula minor</i>          | Little Penguin          | 217.85                              | Little Penguin,Fairy Penguin,Blue Penguin                                            |
| 20   | <i>Ardea herodias</i>           | Great Blue Heron        | 203.08                              | Great Blue Heron                                                                     |
| 21   | <i>Bubo virginianus</i>         | Great Horned Owl        | 190.99                              | Great Horned Owl                                                                     |
| 22   | <i>Falco tinnunculus</i>        | Common Kestrel          | 186.66                              | Common Kestrel,Kestrel,Eurasian Kestrel,Faucon crécerelle                            |
| 23   | <i>Accipiter cooperii</i>       | Cooper's Hawk           | 183.31                              | Cooper's Hawk                                                                        |
| 24   | <i>Aptenodytes patagonicus</i>  | King Penguin            | 178.05                              | King Penguin,Manchot royal                                                           |
| 25   | <i>Strix varia</i>              | Barred Owl              | 175.16                              | Barred Owl                                                                           |
| 26   | <i>Bubo scandiaca</i>           | Snowy Owl               | 168.87                              | Snowy Owl                                                                            |
| 27   | <i>Falco columbarius</i>        | Merlin                  | 165.1                               | Merlin,Faucon émerillon                                                              |

S6 Table continued

| Rank | Species                        | Common names                | Average monthly web serach interest | All common names                                                                      |
|------|--------------------------------|-----------------------------|-------------------------------------|---------------------------------------------------------------------------------------|
| 28   | <i>Apus apus</i>               | Common Swift                | 161.32                              | Common Swift,Swift,European Swift,Martinet noir                                       |
| 29   | <i>Athene cunicularia</i>      | Burrowing Owl               | 146.64                              | Burrowing Owl                                                                         |
| 30   | <i>Spheniscus demersus</i>     | African Penguin             | 136.82                              | African Penguin,Jackass Penguin,Black-footed Penguin,Manchot du Cap,Pingüino del Cabo |
| 31   | <i>Strix occidentalis</i>      | Spotted Owl                 | 136.02                              | Spotted Owl,Búho Manchado,Cárabo Californiano                                         |
| 32   | <i>Grus grus</i>               | Common Crane                | 134.17                              | Common Crane,Crane,Grue cendrée                                                       |
| 33   | <i>Garrulus glandarius</i>     | Eurasian Jay                | 132.62                              | Eurasian Jay,Jay                                                                      |
| 34   | <i>Eudyptes chrysolophus</i>   | Macaroni Penguin            | 122.93                              | Macaroni Penguin,Gorfou doré                                                          |
| 35   | <i>Gymnogyps californianus</i> | California Condor           | 115.24                              | California Condor,Cóndor Californiano,Cóndor de California                            |
| 36   | <i>Strix nebulosa</i>          | Great Grey Owl              | 114.02                              | Great Grey Owl,Great Gray Owl                                                         |
| 37   | <i>Pygoscelis adeliae</i>      | Adelie Penguin              | 110.96                              | Adelie Penguin                                                                        |
| 38   | <i>Branta canadensis</i>       | Canada Goose                | 109.26                              | Canada Goose                                                                          |
| 39   | <i>Eudyptes chrysocome</i>     | Southern Rockhopper Penguin | 108.9                               | Southern Rockhopper Penguin,Rockhopper Penguin                                        |
| 40   | <i>Chen caerulescens</i>       | Snow Goose                  | 105.81                              | Snow Goose                                                                            |
| 41   | <i>Rhea americana</i>          | Greater Rhea                | 105.5                               | Greater Rhea,Lesser Rhea,Common Rhea,Avestruz,Ñandú,Ñandú Común                       |
| 42   | <i>Accipiter gentilis</i>      | Northern Goshawk            | 96.78                               | Northern Goshawk,Eurasian Goshawk,Goshawk,Autour des palombes                         |
| 43   | <i>Buteo jamaicensis</i>       | Red-tailed Hawk             | 95.91                               | Red-tailed Hawk                                                                       |
| 44   | <i>Dryocopus pileatus</i>      | Pileated Woodpecker         | 83.33                               | Pileated Woodpecker                                                                   |
| 45   | <i>Aix galericulata</i>        | Mandarin Duck               | 83.07                               | Mandarin Duck,Mandarin                                                                |
| 46   | <i>Colinus virginianus</i>     | Northern Bobwhite           | 77.91                               | Northern Bobwhite,Bobwhite Quail,Bobwhite                                             |
| 47   | <i>Falco rusticolus</i>        | Gyr Falcon                  | 77.19                               | Gyr Falcon,Gyrfalcon                                                                  |
| 48   | <i>Coracias garrulus</i>       | European Roller             | 71.16                               | European Roller,Roller,Rollier d'Europe                                               |
| 49   | <i>Aix sponsa</i>              | Wood Duck                   | 68.84                               | Wood Duck                                                                             |
| 50   | <i>Circus cyaneus</i>          | Northern Harrier            | 68.37                               | Northern Harrier,Hen Harrier,Busard Saint-Martin                                      |
| 51   | <i>Pavo cristatus</i>          | Indian Peafowl              | 66.88                               | Indian Peafowl,Common Peafowl,Peafowl                                                 |
| 52   | <i>Micrathene whitneyi</i>     | Elf Owl                     | 66.67                               | Elf Owl                                                                               |
| 53   | <i>Pygoscelis papua</i>        | Gentoo Penguin              | 66.5                                | Gentoo Penguin                                                                        |
| 54   | <i>Corvus corax</i>            | Common Raven                | 64.39                               | Common Raven,Northern Raven,Raven                                                     |
| 55   | <i>Strigops habroptila</i>     | Kakapo                      | 63.27                               | Kakapo,Owl Parrot,Cacapo                                                              |

S6 Table continued

| Rank | Species                        | Common names              | Average monthly web serach interest | All common names                                                                                                                    |
|------|--------------------------------|---------------------------|-------------------------------------|-------------------------------------------------------------------------------------------------------------------------------------|
| 56   | <i>Pica pica</i>               | Black-billed Magpie       | 60.87                               | Black-billed Magpie,Eurasian Magpie,Common Magpie,Magpie                                                                            |
| 57   | <i>Falco subbuteo</i>          | Eurasian Hobby            | 59.08                               | Eurasian Hobby,Hobby,European Hobby,Faucon hobereau                                                                                 |
| 58   | <i>Milvus milvus</i>           | Red Kite                  | 56.62                               | Red Kite,Milan royal,Milano Real                                                                                                    |
| 59   | <i>Turdus migratorius</i>      | American Robin            | 56.36                               | American Robin                                                                                                                      |
| 60   | <i>Picoides pubescens</i>      | Downy Woodpecker          | 53.67                               | Downy Woodpecker                                                                                                                    |
| 61   | <i>Anas crecca</i>             | Common Teal               | 53.01                               | Common Teal,Green-winged Teal,Eurasian Teal,Teal,Sarcelle d'hiver                                                                   |
| 62   | <i>Pygoscelis antarcticus</i>  | Chinstrap Penguin         | 52.81                               | Chinstrap Penguin                                                                                                                   |
| 63   | <i>Phasianus colchicus</i>     | Common Pheasant           | 52.65                               | Common Pheasant,Pheasant,Ring-necked Pheasant                                                                                       |
| 64   | <i>Cyanocitta cristata</i>     | Blue Jay                  | 50.6                                | Blue Jay                                                                                                                            |
| 65   | <i>Accipiter nisus</i>         | Eurasian Sparrowhawk      | 49.67                               | Eurasian Sparrowhawk,Sparrowhawk,European Sparrowhawk,Epervier d'Europe                                                             |
| 66   | <i>Megascops asio</i>          | Eastern Screech-owl       | 48.17                               | Eastern Screech-owl,Eastern Screech Owl,Eastern Screech-Owl                                                                         |
| 67   | <i>Alcedo atthis</i>           | Common Kingfisher         | 47.75                               | Common Kingfisher,Kingfisher,European Kingfisher,Martin-pêcheur d'Europe                                                            |
| 68   | <i>Falco sparverius</i>        | American Kestrel          | 47.05                               | American Kestrel                                                                                                                    |
| 69   | <i>Picoides villosus</i>       | Hairy Woodpecker          | 46.06                               | Hairy Woodpecker                                                                                                                    |
| 70   | <i>Nycticorax nycticorax</i>   | Black-crowned Night-heron | 44.97                               | Black-crowned Night-heron,Black-crowned Night-Heron.,Black-crowned Night-Heron,Black-crowned Night Heron,Night Heron,Héron bihoreau |
| 71   | <i>Glaucidium passerinum</i>   | Eurasian Pygmy-owl        | 43.44                               | Eurasian Pygmy-owl,Eurasian Pygmy-Owl,Eurasian Pygmy Owl,Pygmy Owl                                                                  |
| 72   | <i>Gymnomyza samoensis</i>     | Mao                       | 43.08                               | Mao                                                                                                                                 |
| 73   | <i>Colaptes auratus</i>        | Northern Flicker          | 42.92                               | Northern Flicker,Yellow-shafted Flicker                                                                                             |
| 74   | <i>Sterna paradisaea</i>       | Arctic Tern               | 42                                  | Arctic Tern,Sterne arctique                                                                                                         |
| 75   | <i>Strix aluco</i>             | Tawny Owl                 | 41.61                               | Tawny Owl                                                                                                                           |
| 76   | <i>Cairina moschata</i>        | Muscovy Duck              | 41.29                               | Muscovy Duck                                                                                                                        |
| 77   | <i>Spheniscus mendiculus</i>   | Galapagos Penguin         | 41.29                               | Galapagos Penguin,Galápagos Penguin                                                                                                 |
| 78   | <i>Surnia ulula</i>            | Northern Hawk Owl         | 40.75                               | Northern Hawk Owl,Hawk Owl,Northern Hawk-Owl                                                                                        |
| 79   | <i>Cathartes aura</i>          | Turkey Vulture            | 40.4                                | Turkey Vulture                                                                                                                      |
| 80   | <i>Casmerodius albus</i>       | Great Egret               | 39.53                               | Great Egret,Great White Heron,Great White Egret,Grande aigrette                                                                     |
| 81   | <i>Troglodytes troglodytes</i> | Winter Wren               | 39.41                               | Winter Wren,Wren                                                                                                                    |
| 82   | <i>Cygnus atratus</i>          | Black Swan                | 38.96                               | Black Swan                                                                                                                          |
| 83   | <i>Anas rubripes</i>           | American Black Duck       | 36.46                               | American Black Duck,Black Duck                                                                                                      |

S6 Table continued

| Rank | Species                          | Common names       | Average monthly web search interest | All common names                                                       |
|------|----------------------------------|--------------------|-------------------------------------|------------------------------------------------------------------------|
| 84   | <i>Bucephala albeola</i>         | Bufflehead         | 36.46                               | Bufflehead                                                             |
| 85   | <i>Spheniscus humboldti</i>      | Humboldt Penguin   | 36.3                                | Humboldt Penguin, Peruvian Penguin, Pingüino de Humboldt               |
| 86   | <i>Falco cherrug</i>             | Saker Falcon       | 33.17                               | Saker Falcon, Saker, Faucon sacre                                      |
| 87   | <i>Hirundo rustica</i>           | Barn Swallow       | 32.46                               | Barn Swallow, Swallow, European Swallow, Hirondelle de cheminée        |
| 88   | <i>Ardea cinerea</i>             | Grey Heron         | 31.41                               | Grey Heron, Gray Heron, Héron cendré                                   |
| 89   | <i>Eudypetes schlegeli</i>       | Royal Penguin      | 30.45                               | Royal Penguin                                                          |
| 90   | <i>Egretta thula</i>             | Snowy Egret        | 30.29                               | Snowy Egret                                                            |
| 91   | <i>Uria aalge</i>                | Common Guillemot   | 29.89                               | Common Guillemot, Guillemot, Common Murre, Guillemot de Troil          |
| 92   | <i>Turdus merula</i>             | Eurasian Blackbird | 29.87                               | Eurasian Blackbird, Common Blackbird, Blackbird                        |
| 93   | <i>Perdix perdix</i>             | Grey Partridge     | 29.84                               | Grey Partridge, Gray Partridge, Partridge                              |
| 94   | <i>Calidris canutus</i>          | Red Knot           | 29.74                               | Red Knot, Knot, Lesser Knot, Bécasseau maubèche                        |
| 95   | <i>Histrionicus histrionicus</i> | Harlequin Duck     | 29.43                               | Harlequin Duck, Harlequin                                              |
| 96   | <i>Buteo regalis</i>             | Ferruginous Hawk   | 28.82                               | Ferruginous Hawk                                                       |
| 97   | <i>Cardinalis cardinalis</i>     | Northern Cardinal  | 28.43                               | Northern Cardinal                                                      |
| 98   | <i>Botaurus stellaris</i>        | Great Bittern      | 28.34                               | Great Bittern, Eurasian Bittern, Common Bittern, Bittern, Butor étoilé |
| 99   | <i>Numenius arquata</i>          | Eurasian Curlew    | 28.12                               | Eurasian Curlew, Curlew, Courlis cendré                                |
| 100  | <i>Falco mexicanus</i>           | Prairie Falcon     | 27.95                               | Prairie Falcon                                                         |
