# Supplementary material for: Popular interest in vertebrates does not reflect extinction risk and is associated with bias in conservation investment
Source: PubMed Central journal article supplement (PMC6157853; doi:10.1371/journal.pone.0203694), 2018-09-26
Supplement: pone.0203694.s008.pdf [file pone.0203694.s008.pdf]

**S7 Table. Species of endangered and critically endangered vertebrate that receive low web search interest.**

Species names are given only. Letters in parenthesis represent extinction risk followed by population trend as given by the IUCN red list of threatened species. Extinction risk: EN=Endangered, CR = Critically Endangered; Population Trend: D = Decreasing, S = Stable, I = Increasing, U = Unknown, blank spaces occur where population trend was not specified.

**S7 Table continued**

**AMPHIBIA:** *Alsodes montanus* (CR, D); *Alsodes pehuenche* (CR, D); *Alsodes tumultuosus* (CR, D); *Alsodes vanzolinii* (CR, D); *Eupsophus contulmoensis* (EN, U); *Eupsophus insularis* (CR, U); *Eupsophus migueli* (EN, D); *Eupsophus nahuelbutensis* (EN, S); *Discoglossus nigriventer* (CR, U); *Allobates juanii* (CR, D); *Allobates kingsburyi* (EN, D); *Allobates mandelorum* (EN, D); *Allobates ranoides* (EN, D); *Aromobates alboguttatus* (EN, D); *Aromobates duranti* (EN, D); *Aromobates haydeae* (EN, D); *Aromobates leopardalis* (CR, D); *Aromobates mayorgai* (EN, U); *Aromobates meridensis* (CR, D); *Aromobates molinarii* (EN, U); *Aromobates nocturnus* (CR, D); *Aromobates orostoma* (EN, U); *Aromobates saltuensis* (EN, S); *Aromobates serranus* (EN, D); *Mannophryne caquetio* (CR, D); *Mannophryne collaris* (EN, D); *Mannophryne cordilleriana* (CR, S); *Mannophryne lamarcai* (CR, D); *Mannophryne leonardo* (EN, D); *Mannophryne neblina* (CR, D); *Mannophryne riveroi* (EN, D); *Mannophryne trujillensis* (EN, D); *Mannophryne yustizi* (EN, D); *Prostherapis dunnii* (CR, D); *Arthroleptis cruscolum* (EN, D); *Arthroleptis fichika* (EN, U); *Arthroleptis francei* (EN, D); *Arthroleptis kidogo* (CR, U); *Arthroleptis krokosua* (EN, U); *Arthroleptis kutogundua* (CR, U); *Arthroleptis nikeae* (EN, D); *Arthroleptis perreti* (EN, U); *Arthroleptis troglodytes* (CR, D); *Astylosternus fallax* (EN, D); *Astylosternus laurenti* (EN, D); *Astylosternus nganhanus* (CR, D); *Astylosternus perreti* (EN, D); *Astylosternus ranoides* (EN, D); *Astylosternus schioetzi* (EN, D); *Cardioglossa alsco* (CR, D); *Cardioglossa aureoli* (EN, D); *Cardioglossa melanogaster* (EN, D); *Cardioglossa oreas* (EN, D); *Cardioglossa pulchra* (EN, D); *Cardioglossa schioetzi* (EN, D); *Cardioglossa trifasciata* (CR, D); *Cardioglossa venusta* (EN, D); *Leptodactylodon axillaris* (CR, U); *Leptodactylodon erythrogaster* (CR, D); *Leptodactylodon mertensi* (EN, U); *Leptodactylodon ornatus* (EN, D); *Leptodactylodon perreti* (EN, D); *Leptodactylodon stevarti* (EN, D); *Leptodactylodon wildi* (EN, D); *Leptopelis karissimbensis* (EN, D); *Leptopelis parkeri* (EN, U); *Leptopelis susanae* (EN, U); *Leptopelis uluguruensis* (EN, U); *Leptopelis xenodactylus* (EN, U); *Atelognathus patagonicus* (EN, D); *Atelognathus praebasalticus* (EN, D); *Atelognathus reverberii* (EN, D); *Barbourula kalimantanensis* (EN, D); *Bombina pachypus* (EN, D); *Balebreviceps hillmani* (CR, D); *Breviceps sylvestris* (EN, U); *Callulina hanseni* (CR, U); *Callulina kanga* (CR, U); *Callulina kisiwamsitu* (EN, D); *Callulina laphami* (CR, U); *Callulina meteora* (CR, U); *Callulina shengena* (CR, U); *Callulina stanleyi* (CR, U); *Probreviceps durirostris* (EN, U); *Probreviceps loveridgei* (EN, S); *Probreviceps macrodactylus* (EN, U); *Probreviceps rhodesianus* (EN, D); *Probreviceps rungwensis* (EN, U); *Probreviceps uluguruensis* (EN, U); *Adenomus dasi* (CR, D); *Adenomus kandianus* (CR, U); *Adenomus kelaartii* (EN, D); *Altiphrynomys malcolmi* (EN, D); *Amietophrynus brauni* (EN, D); *Amietophrynus djohongensis* (EN, D); *Amietophrynus pantherinus* (EN, U); *Amietophrynus taiensis* (CR, D); *Amietophrynus villiersi* (EN, D); *Anaxyrus californicus* (EN, D); *Anaxyrus canorus* (EN, D); *Anaxyrus houstonensis* (EN, D); *Anaxyrus nelsoni* (EN, D); *Andinophryne colomai* (CR, D); *Ansonia guibei* (EN, D); *Ansonia latidisca* (EN, D); *Ansonia platysoma* (EN, D); *Atelopus andinus* (CR, D); *Atelopus angelito* (CR, D); *Atelopus ardila* (CR, D); *Atelopus arsyecue* (CR, D); *Atelopus arthuri* (CR, D); *Atelopus balios* (CR, D); *Atelopus bomolochos* (CR, D); *Atelopus boulengeri* (CR, D); *Atelopus carauta* (CR, D); *Atelopus carbonerensis* (CR, D); *Atelopus carrikeri* (CR, U); *Atelopus certus* (EN, D); *Atelopus chiriquiensis* (CR, D); *Atelopus chirripoensis* (CR, U); *Atelopus choacoensis* (CR, D); *Atelopus chrysocorallus* (CR, D); *Atelopus coynei* (CR, D); *Atelopus cruciger* (CR, D); *Atelopus dimorphus* (EN, D); *Atelopus ebenoides* (CR, D); *Atelopus elegans* (CR, D); *Atelopus epikeisthos* (CR, D); *Atelopus erythropus* (CR, D); *Atelopus eusebianus* (CR, D); *Atelopus eusebioidiazii* (CR, D); *Atelopus exiguus* (CR, D); *Atelopus famelicus* (CR, D); *Atelopus farci* (CR, D); *Atelopus galactogaster* (CR, U); *Atelopus gigas* (CR, U); *Atelopus glyphus* (CR, D); *Atelopus guanujo* (CR, D); *Atelopus guitarraensis* (CR, D); *Atelopus halihelos* (CR, D); *Atelopus laetissimus* (CR, D); *Atelopus limosus* (EN, D); *Atelopus longibrachius* (EN, D); *Atelopus lozanoi* (CR, D); *Atelopus lynchi* (CR, D); *Atelopus mandingues* (CR, U); *Atelopus mindoensis* (CR, D); *Atelopus minutulus* (CR, D); *Atelopus mittermeieri* (EN, D); *Atelopus monohernandezii* (CR, D); *Atelopus mucubajiensis* (CR, D); *Atelopus muisca* (CR, D); *Atelopus nahumae* (CR, U); *Atelopus nanay* (CR, D); *Atelopus nepiozomus* (CR, U); *Atelopus nicefori* (CR, U); *Atelopus onorei* (CR, D); *Atelopus orcesi* (CR, D); *Atelopus oxapampae* (EN, U); *Atelopus oxyrhynchus* (CR, D); *Atelopus pachydermus* (CR, D); *Atelopus pastuso* (CR, U); *Atelopus patazensis* (CR, D); *Atelopus pedimarmoratus* (CR, U); *Atelopus peruensis* (CR, U); *Atelopus petersi* (CR, D); *Atelopus petriruizi* (CR, U); *Atelopus pictiventris* (CR, U); *Atelopus pinangoi* (CR, D); *Atelopus planispina* (CR, D); *Atelopus podocarpus* (CR, U); *Atelopus pulcher* (CR, D); *Atelopus pyrodactylus* (CR, U); *Atelopus quimbaya* (CR, U); *Atelopus reticulatus* (CR, D); *Atelopus seminiferus* (CR, D); *Atelopus senex* (CR, D); *Atelopus sernai* (CR, D); *Atelopus simulatus* (CR, D); *Atelopus sonsonensis* (CR, U); *Atelopus soriano* (CR, D); *Atelopus subornatus* (CR, D); *Atelopus tamaense* (CR, D); *Atelopus walkerii* (CR, D); *Bufoides meghalayanus* (EN, U); *Churamiti maridadi* (CR, D); *Dendrophryniscus carvalhoi* (EN, D); *Didynamis sjostedti* (EN, D); *Duttaphrynus beddomii* (EN, D); *Duttaphrynus kotagamai* (EN, D); *Duttaphrynus noellerti* (EN, D); *Duttaphrynus sumatranus* (CR, D); *Ghatophryne ornata* (EN, D); *Incilius cavifrons* (EN, D); *Incilius cristatus* (CR, D); *Incilius fastidiosus* (CR, D); *Incilius gemmifer* (EN, D); *Incilius holdridgei* (CR, U); *Incilius ibarrai* (EN, D); *Incilius leucomyos* (EN, D); *Incilius peripatetes* (CR, D); *Incilius perplexus* (EN, D); *Incilius spiculatus* (EN, D); *Incilius tacanensis* (EN, D); *Incilius tutelarius* (EN, D); *Ingerophrynus claviger* (EN, D); *Ingerophrynus kumquat* (EN, D); *Leptophryne cruentata* (CR, D); *Melanophryniscus admirabilis* (CR, D); *Melanophryniscus devincenzii* (EN, D); *Melanophryniscus langonei* (CR, U); *Melanophryniscus peritus* (CR, U); *Mertensophryne anotis* (EN, D); *Mertensophryne howelli* (EN, D); *Mertensophryne usambarae* (EN, D); *Nectophrynoides cryptus* (EN, D); *Nectophrynoides laticeps* (EN, D); *Nectophrynoides minutus* (EN, D); *Nectophrynoides paulae* (CR, D); *Nectophrynoides poyntoni* (CR, D); *Nectophrynoides pseudotornieri* (EN, D); *Nectophrynoides vestergaardi* (EN, D); *Nectophrynoides wendyae* (CR, D); *Nimbaphrynoides liberiensis* (CR, D); *Nimbaphrynoides occidentalis* (CR, D); *Osornophryne antisana* (EN, D); *Osornophryne guacamayo* (EN, D); *Osornophryne percassa* (EN, D); *Osornophryne peruana* (EN, U); *Osornophryne talipes* (EN, D); *Parapelophryne scalpta* (EN, D); *Pedostibes tubercululosus* (EN, D); *Pelophryne albotaeniata* (EN, D); *Pelophryne api* (EN, D); *Pelophryne linaianensis* (EN, U); *Pelophryne murudensis* (CR, U); *Peltophryne cataulaceps* (EN, D); *Peltophryne florentinoi* (CR, U); *Peltophryne fluviatica* (CR, D); *Peltophryne fracta* (EN, D); *Peltophryne lemur* (CR, D); *Peltophryne longinasus* (EN, D); *Rhaebo caeruleostictus* (EN, D); *Rhinella amabilis* (CR, D); *Rhinella chavin* (CR, D); *Rhinella chrysozona* (EN, D); *Rhinella gallardoi* (EN, D); *Rhinella macrorhina* (EN, D); *Rhinella nesiotis* (EN, D); *Rhinella nicefori* (EN, D); *Rhinella rostrata* (CR, D); *Rhinella sclerocephala* (EN, D); *Vandijkophrynus amatolicus* (CR, D); *Vandijkophrynus inyangae* (EN, D); *Werneria bambutensis* (EN, D); *Werneria iboundji* (CR, D); *Werneria mertensiana* (EN, D); *Werneria preussi* (EN, U); *Werneria submontana* (EN, D); *Werneria tandyi* (EN, D); *Wolterstorffina chirioi* (CR, D); *Wolterstorffina mirei* (EN, D); *Xanthophryne koynayensis* (EN, D); *Xanthophryne tigrina* (CR, D); *Telmatobufo bullocki* (CR, U); *Telmatobufo venustus* (EN, U); *Centrolene audax* (EN, D); *Centrolene azulae* (EN, D); *Centrolene ballux* (CR, D); *Centrolene fernandoi* (EN, D); *Centrolene gemmatum* (CR, D); *Centrolene heloderma* (CR, D); *Centrolene lynchi* (EN, D); *Centrolene petrophilum* (EN, D); *Centrolene pipilatum* (EN, D); *Cochranella mache* (EN, U); *Hyalinobatrachium cardiacalyptum* (EN, D); *Hyalinobatrachium crybetes* (CR, D); *Hyalinobatrachium esmeralda* (EN, D); *Hyalinobatrachium guairarepanense* (EN, D); *Hyalinobatrachium pallidum* (EN, D); *Hyalinobatrachium pellicudum* (EN, D); *Nymphargus anomalus* (CR, D); *Nymphargus laurae* (CR, U); *Nymphargus luminosus* (EN, D); *Nymphargus mariae* (EN, D); *Nymphargus megacheirus* (EN, D); *Nymphargus puoyensis* (EN, U); *Rulyrana saxiscandens* (EN, D); *Platymantis cagayanensis* (EN, D); *Platymantis hazelae* (EN, D); *Platymantis insulatus* (CR, D); *Platymantis lawtoni* (EN, D); *Platymantis levigatus* (EN, D); *Platymantis negrosensis* (EN, D); *Platymantis panayensis* (EN, D); *Platymantis polillensis* (EN, D); *Platymantis spelaeus* (EN, D); *Platymantis subterrestris* (EN, D); *Platymantis taylori* (EN, D); *Platymantis vitianus* (EN, D); *Conraua derooi* (CR, D); *Atopophrynus syntomopus* (CR, D); *Bryophryne bustamantei* (EN, U); *Bryophryne cophites* (EN, U); *Craugastor anciano* (CR, D); *Craugastor andi* (CR, D); *Craugastor angelicus* (CR, D); *Craugastor aurilegulus* (EN, D); *Craugastor azueroensis* (EN, D); *Craugastor catalinae* (CR, D); *Craugastor charadra* (EN, D); *Craugastor coffeus* (CR, D); *Craugastor cruzi* (CR, D); *Craugastor daryi* (EN, D); *Craugastor emcelae* (CR, D); *Craugastor emleni* (CR, D); *Craugastor epochthidius* (CR, D); *Craugastor fecundus* (CR, D); *Craugastor fleischmanni* (CR, U); *Craugastor glaucus* (CR, D); *Craugastor greggi* (CR, D); *Craugastor guerreroensis* (CR, D); *Craugastor gulosus* (EN, U); *Craugastor hobartsmithi* (EN, D); *Craugastor inachus* (EN, D); *Craugastor laevisissimus* (EN, D); *Craugastor lauraster* (EN, D); *Craugastor lineatus* (CR, D); *Craugastor megalotympanum* (CR, D); *Craugastor merendonensis* (CR, D); *Craugastor milesi* (CR, U); *Craugastor montanus* (EN, D); *Craugastor obesus* (EN, D); *Craugastor olanchano* (CR, D); *Craugastor omitemanus* (EN, D); *Craugastor omoaensis* (CR, D); *Craugastor pechorum* (EN, D);

**S7 Table continued**

Craugastor polymniae (CR, D); Craugastor pozo (CR, D); Craugastor punctariolus (EN, D); Craugastor ranoides (CR, D); Craugastor rhyacobatrachus (EN, D); Craugastor sabrinus (EN, D); Craugastor saltuarius (CR, D); Craugastor sandersoni (EN, D); Craugastor silvicola (EN, D); Craugastor spatulatus (EN, D); Craugastor stadelmani (CR, D); Craugastor stuarti (EN, D); Craugastor tabasarae (CR, D); Craugastor taurus (CR, D); Craugastor trachydermus (CR, D); Craugastor uno (EN, D); Craugastor vulcani (EN, D); Geobatrachus walkeri (EN, D); Holoaden bradei (CR, D); Hypodactylus brunneus (EN, D); Hypodactylus ellassodiscus (EN, D); Hypodactylus latens (EN, D); Hypodactylus lucida (CR, D); Lynchius parkeri (EN, D); Niceforonia adenobranchia (CR, D); Oreobates pereger (CR, D); Oreobates zongoensis (CR, D); Phrynopus bracki (EN, D); Phrynopus dagmarae (CR, D); Phrynopus heimorum (CR, D); Phrynopus juninensis (CR, D); Phrynopus kauneorum (CR, D); Phrynopus montium (EN, D); Phrynopus tautorum (CR, S); Pristimantis acerus (EN, D); Pristimantis actinolaimus (EN, D); Pristimantis acutirostris (EN, D); Pristimantis albericoi (CR, D); Pristimantis angustilineatus (EN, D); Pristimantis atratus (EN, D); Pristimantis bacchus (EN, D); Pristimantis balionotus (EN, D); Pristimantis baryecuus (EN, D); Pristimantis bellona (EN, D); Pristimantis bernali (CR, D); Pristimantis cabrerai (EN, D); Pristimantis cacao (EN, D); Pristimantis calcaratus (EN, D); Pristimantis capitonis (EN, D); Pristimantis chrysops (EN, D); Pristimantis colomai (EN, D); Pristimantis cosnipatae (EN, D); Pristimantis cremnobates (EN, D); Pristimantis crenunguis (EN, D); Pristimantis cryophilus (EN, D); Pristimantis cryptomelas (EN, D); Pristimantis degener (EN, D); Pristimantis deinops (EN, D); Pristimantis devillei (EN, D); Pristimantis dissimulatus (EN, D); Pristimantis dorsopictus (EN, D); Pristimantis eugeniae (EN, D); Pristimantis euphronides (EN, D); Pristimantis fallax (EN, D); Pristimantis fasciatus (EN, U); Pristimantis festae (EN, D); Pristimantis fetosus (EN, D); Pristimantis gentryi (EN, D); Pristimantis ginesi (EN, D); Pristimantis gladiator (EN, U); Pristimantis glandulosus (EN, D); Pristimantis hamiotae (CR, D); Pristimantis helvolus (EN, D); Pristimantis hernandezi (EN, D); Pristimantis ignicolor (EN, D); Pristimantis incanus (EN, D); Pristimantis insignitus (EN, D); Pristimantis johannesdei (EN, D); Pristimantis jorgevelosai (EN, D); Pristimantis katoptroides (EN, D); Pristimantis lancinii (EN, D); Pristimantis lemur (EN, D); Pristimantis lichenoides (CR, D); Pristimantis lividus (EN, D); Pristimantis loustes (EN, D); Pristimantis maculosus (EN, D); Pristimantis mars (EN, D); Pristimantis merostictus (EN, D); Pristimantis mnionaetes (EN, D); Pristimantis modipeplus (EN, D); Pristimantis museosus (EN, U); Pristimantis ocreatus (EN, D); Pristimantis orestes (EN, D); Pristimantis paramerus (EN, D); Pristimantis parectatus (EN, D); Pristimantis pastazensis (EN, D); Pristimantis percultus (EN, D); Pristimantis phragmipleuron (CR, D); Pristimantis polychrus (EN, D); Pristimantis prolatus (EN, D); Pristimantis proserpens (EN, D); Pristimantis pteridophilus (EN, D); Pristimantis pycnoderms (EN, D); Pristimantis pyrromerus (EN, D); Pristimantis renjiforum (EN, D); Pristimantis rhodoplichus (EN, D); Pristimantis rivasi (EN, U); Pristimantis rubicundus (EN, D); Pristimantis ruthveni (EN, D); Pristimantis scoloblepharus (EN, D); Pristimantis scolodiscus (EN, D); Pristimantis shrevei (EN, D); Pristimantis simonbolivari (EN, D); Pristimantis simonsii (CR, D); Pristimantis simoteriscus (EN, D); Pristimantis siopelus (EN, D); Pristimantis sobetes (EN, D); Pristimantis spilogaster (EN, D); Pristimantis suetus (EN, D); Pristimantis sulculus (EN, D); Pristimantis surdus (EN, D); Pristimantis tenebrionis (EN, D); Pristimantis thymalopsoides (EN, D); Pristimantis torrenticola (CR, D); Pristimantis tribulosus (CR, D); Pristimantis truebae (EN, D); Pristimantis turumiquirensis (EN, D); Pristimantis urichi (EN, D); Pristimantis veletis (CR, D); Pristimantis vidua (EN, D); Pristimantis viridicans (EN, D); Pristimantis zophus (EN, D); Psychrophrynella boettgeri (EN, U); Psychrophrynella guillei (CR, U); Psychrophrynella illimani (CR, U); Psychrophrynella kallawayana (CR, S); Psychrophrynella saltator (CR, S); Psychrophrynella usurpator (EN, D); Strabomantis helonotus (CR, D); Strabomantis ruizi (EN, D); Yunganastes bisignatus (EN, D); Cycloramphus faustoi (CR, U); Insuetophrynus acarpicus (CR, S); Rhinoderma rufum (CR, D); Thoropa lutzi (EN, D); Ameerega ingeri (CR, D); Ameerega planipalaeae (CR, D); Colostethus jacobuspetersi (CR, D); Colostethus mertensi (EN, D); Colostethus ruthveni (EN, D); Epipedobates tricolor (EN, D); Excidobates mysteriosus (EN, D); Hyloxalus anthracinus (CR, D); Hyloxalus azureiventris (EN, D); Hyloxalus cevallosi (EN, D); Hyloxalus delatorreae (CR, D); Hyloxalus edwardsi (CR, D); Hyloxalus elachyhistus (EN, D); Hyloxalus ruizi (CR, D); Hyloxalus toachi (EN, D); Hyloxalus vertebralis (CR, D); Minyobates steyermarki (CR, D); Oophaga arborea (EN, U); Oophaga lehmanni (CR, D); Oophaga speciosa (EN, U); Phyllobates vittatus (EN, S); Ranitomeya abdita (CR, D); Ranitomeya bombetes (EN, D); Ranitomeya dorisswansonae (CR, U); Ranitomeya sirensis (EN, D); Ranitomeya summersi (EN, D); Ranitomeya tolimensis (EN, U); Ranitomeya virolinensis (EN, D); Fejervarya nicobariensis (EN, D); Ingerana charlesdarwini (CR, D); Limnonectes arathooni (EN, D); Limnonectes microtypanum (EN, D); Limnonectes namiyei (EN, D); Limnonectes nitidus (EN, D); Minervarya sahyadris (EN, D); Nannophrys marmorata (CR, D); Nannophrys naeyakai (EN, D); Nanorana maculosa (EN, D); Nanorana unculuanus (EN, D); Nanorana yunnanensis (EN, D); Quasipaa boulengeri (CR, D); Quasipaa robertingeri (EN, D); Zakerana greenii (EN, D); Zakerana murthii (CR, D); Zakerana nilagirica (EN, D); Adelophryne maranguapensis (EN, D); Eleutherodactylus acmonis (EN, D); Eleutherodactylus adelus (EN, D); Eleutherodactylus albipes (CR, D); Eleutherodactylus alcoae (EN, U); Eleutherodactylus amadeus (CR, D); Eleutherodactylus amplinympha (EN, S); Eleutherodactylus andrewsi (EN, D); Eleutherodactylus apostates (CR, U); Eleutherodactylus armstrongi (EN, D); Eleutherodactylus auriculatoides (EN, D); Eleutherodactylus bakeri (CR, D); Eleutherodactylus barlagnei (EN, S); Eleutherodactylus bartonsmithi (CR, D); Eleutherodactylus blairhedgesi (CR, D); Eleutherodactylus bresslerae (CR, D); Eleutherodactylus brevisrostris (CR, D); Eleutherodactylus caribe (CR, U); Eleutherodactylus casparii (EN, D); Eleutherodactylus cavernicola (CR, U); Eleutherodactylus chlorophenax (CR, D); Eleutherodactylus corona (CR, D); Eleutherodactylus counouspeus (EN, D); Eleutherodactylus cubanus (CR, D); Eleutherodactylus darlingtoni (CR, U); Eleutherodactylus dennisi (EN, U); Eleutherodactylus dilatus (EN, D); Eleutherodactylus diplasius (EN, U); Eleutherodactylus dixoni (CR, D); Eleutherodactylus dolomedes (CR, D); Eleutherodactylus emiliae (EN, D); Eleutherodactylus eneidae (CR, D); Eleutherodactylus etheridgei (EN, S); Eleutherodactylus eunaster (CR, U); Eleutherodactylus fowleri (CR, D); Eleutherodactylus furcyensis (CR, U); Eleutherodactylus fuscus (CR, U); Eleutherodactylus glamyrus (EN, D); Eleutherodactylus glandulifer (CR, U); Eleutherodactylus glanduliferoides (CR, D); Eleutherodactylus glaphycompus (EN, D); Eleutherodactylus grabhami (EN, D); Eleutherodactylus grahami (EN, D); Eleutherodactylus grandis (CR, D); Eleutherodactylus greyi (EN, D); Eleutherodactylus griphus (CR, D); Eleutherodactylus gryllus (EN, D); Eleutherodactylus guanahacabibes (EN, D); Eleutherodactylus gundlachi (EN, S); Eleutherodactylus haitianus (EN, D); Eleutherodactylus hedricki (EN, D); Eleutherodactylus heminota (EN, D); Eleutherodactylus hypostenor (EN, D); Eleutherodactylus iberia (CR, D); Eleutherodactylus intermedius (EN, U); Eleutherodactylus ionthus (EN, S); Eleutherodactylus jamaicensis (EN, D); Eleutherodactylus jasperi (CR, D); Eleutherodactylus jamei (CR, D); Eleutherodactylus juanariveroi (CR, U); Eleutherodactylus jugans (CR, D); Eleutherodactylus junori (CR, D); Eleutherodactylus karlschmidti (CR, D); Eleutherodactylus klinikowskii (EN, D); Eleutherodactylus lamprotes (CR, D); Eleutherodactylus leberi (EN, D); Eleutherodactylus lentus (EN, D); Eleutherodactylus leonci (CR, U); Eleutherodactylus locustus (CR, D); Eleutherodactylus lucioi (CR, D); Eleutherodactylus luteolus (EN, D); Eleutherodactylus mariposa (CR, D); Eleutherodactylus melacara (EN, D); Eleutherodactylus michaelsschmidi (EN, U); Eleutherodactylus minutus (EN, D); Eleutherodactylus montanus (EN, D); Eleutherodactylus nortoni (CR, D); Eleutherodactylus notidodes (EN, D); Eleutherodactylus nubicola (EN, D); Eleutherodactylus orcutti (CR, D); Eleutherodactylus orientalis (CR, D); Eleutherodactylus oxyrhynchus (CR, U); Eleutherodactylus parabates (CR, U); Eleutherodactylus parapelates (CR, U); Eleutherodactylus patriciae (EN, D); Eleutherodactylus paulsoni (CR, D); Eleutherodactylus pezopetrus (CR, D); Eleutherodactylus pinarensis (EN, D); Eleutherodactylus pinchoni (EN, D); Eleutherodactylus pituinus (EN, D); Eleutherodactylus poolei (CR, U); Eleutherodactylus portoricensis (EN, D); Eleutherodactylus principalis (EN, D); Eleutherodactylus probolaeus (EN, D); Eleutherodactylus rhodesi (CR, U); Eleutherodactylus richmondi (CR, D); Eleutherodactylus rivularis (CR, D); Eleutherodactylus rufescens (CR, D); Eleutherodactylus ruffemoralis (CR, U); Eleutherodactylus ruthae (EN, D); Eleutherodactylus saxatilis (EN, D); Eleutherodactylus schmidti (CR, D); Eleutherodactylus schwartzii (EN, D); Eleutherodactylus sciagraphus (CR, U); Eleutherodactylus semipalmatus (CR, D); Eleutherodactylus simulans (EN, D); Eleutherodactylus sisypodemus (CR, D); Eleutherodactylus sommeri (EN, U); Eleutherodactylus symingtoni (CR, D); Eleutherodactylus syristes (EN, D); Eleutherodactylus tetajulia (CR, D); Eleutherodactylus thomasi (EN, D); Eleutherodactylus thorectes (CR, U); Eleutherodactylus toa (EN, D); Eleutherodactylus tonyi (CR, D); Eleutherodactylus turquinensis (CR, D); Eleutherodactylus ventrilineatus (CR, U); Eleutherodactylus warreni (CR, U); Eleutherodactylus wightmanae (EN, D); Eleutherodactylus zeus (EN, D); Eleutherodactylus zugi (EN, D); Heleophryne hewitti (EN, U); Heleophryne rosei (CR, S); Cryptobatrachus boulengeri (EN, D); Cryptobatrachus nicefori (CR, D); Flectonotus fitzgeraldi (EN, D); Gastrotheca bufona (EN, D); Gastrotheca christiani (EN, D); Gastrotheca cornuta (EN, D); Gastrotheca espeletia (EN, D); Gastrotheca lauzuricae (CR, D); Gastrotheca litonedis (EN, D); Gastrotheca orophylax (EN, D); Gastrotheca ovifera (EN, D); Gastrotheca pseustes (EN, D); Gastrotheca psychrophila (EN, D); Gastrotheca riobambae (EN, D); Gastrotheca ruizi (EN, D); Gastrotheca splendens (EN, D); Gastrotheca stictopleura (EN, D); Gastrotheca trachyceps (EN, D); Gastrotheca zeugocystis (CR, D); Hemiphractus johnsoni (EN, D); Agalychnis annae (EN, D); Agalychnis moreletii (CR, D); Argenteohyla siemersi (EN, D); Bokermannohyla izecksohni (CR, D); Bromeliohyla bromeliacia (EN, D); Bromeliohyla dendroscarta (CR, D); Charadrahyla altipotens (CR, D); Charadrahyla chaneque (EN, D); Charadrahyla trux (CR, D); Dendropsophus amicorum (CR, D); Dendropsophus gryllatus (EN, D); Dendropsophus meridensis (EN, D); Duellmanohyla

**S7 Table continued**

chamulae (EN, D); Duellmanohyla ignicolor (EN, D); Duellmanohyla lythrodes (EN, D); Duellmanohyla salvavida (CR, D); Duellmanohyla soralia (CR, D); Duellmanohyla uranochroa (EN, I); Ecnomiohyla echinata (CR, D); Ecnomiohyla fimbrimembra (EN, D); Ecnomiohyla minera (EN, D); Ecnomiohyla phantasmagoria (EN, D); Ecnomiohyla rabborum (CR, D); Ecnomiohyla salvaje (CR, D); Ecnomiohyla valancifer (CR, D); Exerodonta catracha (EN, D); Exerodonta chimalapa (EN, D); Exerodonta perkinsi (CR, D); Hyla bocourti (CR, D); Hyla heinzsteinitzii (CR, D); Hylomantis lemur (CR, D); Hyloscirtus charazani (EN, D); Hyloscirtus chlorosteus (CR, D); Hyloscirtus colymba (CR, D); Hyloscirtus denticulatus (EN, D); Hyloscirtus lynchi (EN, D); Hyloscirtus pantostictus (EN, D); Hyloscirtus piceigularis (EN, D); Hyloscirtus psarolaimus (EN, U); Hyloscirtus ptychodactylus (CR, D); Hyloscirtus simmonsii (EN, D); Hyloscirtus staufferorum (EN, D); Hypsiboas cymbalum (CR, D); Isthmohyla angustilineata (CR, D); Isthmohyla calypsa (CR, D); Isthmohyla debilis (CR, D); Isthmohyla granceae (CR, D); Isthmohyla insolita (CR, D); Isthmohyla pictipes (EN, D); Isthmohyla rivularis (CR, D); Isthmohyla tica (CR, U); Litoria booroolongensis (CR, D); Litoria brevipalmata (EN, D); Litoria castanea (CR, U); Litoria cooloolensis (EN, D); Litoria dayi (EN, D); Litoria lorica (CR, D); Litoria myola (CR, D); Litoria nannotis (EN, S); Litoria nyakalensis (CR, D); Litoria piperata (CR, U); Litoria raniformis (EN, D); Litoria rheocola (EN, D); Litoria spenceri (CR, D); Megastomatohyla mixe (CR, D); Megastomatohyla mixomaculata (EN, D); Megastomatohyla nubicola (EN, D); Megastomatohyla pellita (CR, D); Osteopilus crucialis (EN, D); Osteopilus marianae (EN, D); Osteopilus wilderi (EN, D); Phyllomedusa ayeaye (CR, U); Phyllomedusa baltea (EN, D); Phyllomedusa ecuatoriana (EN, D); Phytotriades auratus (CR, D); Plectrohyla acanthodes (CR, D); Plectrohyla arborescens (EN, D); Plectrohyla avia (CR, D); Plectrohyla calthula (CR, D); Plectrohyla calvicollina (CR, D); Plectrohyla celata (CR, D); Plectrohyla cembra (CR, D); Plectrohyla charadricola (EN, D); Plectrohyla chryses (CR, D); Plectrohyla chrysopleura (CR, D); Plectrohyla crassa (CR, D); Plectrohyla cyanomma (CR, D); Plectrohyla cyclada (EN, D); Plectrohyla dasyopus (CR, D); Plectrohyla ephemera (CR, D); Plectrohyla exquisita (CR, D); Plectrohyla glandulosa (EN, D); Plectrohyla guatemalensis (CR, D); Plectrohyla hartwegi (CR, D); Plectrohyla hazelae (CR, D); Plectrohyla ixil (CR, D); Plectrohyla lacertosa (EN, D); Plectrohyla mykter (EN, D); Plectrohyla pachyderma (CR, D); Plectrohyla pentheter (EN, D); Plectrohyla pokomchi (CR, D); Plectrohyla psarosema (CR, D); Plectrohyla psiloderma (EN, U); Plectrohyla pycnochila (CR, D); Plectrohyla quecchi (CR, D); Plectrohyla robertsororum (EN, D); Plectrohyla sabrina (CR, D); Plectrohyla sagorum (EN, U); Plectrohyla siopela (CR, D); Plectrohyla tecunumani (CR, D); Plectrohyla teuchestes (CR, D); Plectrohyla thorettes (CR, D); Ptychohyla dendrophasma (CR, D); Ptychohyla erythromma (EN, D); Ptychohyla hypomykter (CR, D); Ptychohyla legleri (EN, D); Ptychohyla leonhardschultzei (EN, D); Ptychohyla macrotypanum (CR, D); Ptychohyla panchoi (EN, D); Ptychohyla salvadorensis (EN, D); Ptychohyla sanctaecrucis (CR, D); Ptychohyla spinipollex (EN, D); Scinax alcatraz (CR, D); Scinax belloni (EN, U); Scinax faivovichii (CR, S); Scinax peixotoi (CR, U); Smilisca dentata (EN, D); Afrixalus clarkei (EN, U); Afrixalus knysnae (EN, U); Afrixalus lacteus (EN, D); Afrixalus sylvaticus (EN, D); Afrixalus uluguruensis (EN, D); Alexerodon jynx (CR, D); Arlequinus krebsi (EN, D); Hyperolius bobirensis (EN, D); Hyperolius dintelmanni (EN, D); Hyperolius kihangensis (EN, D); Hyperolius leleupi (EN, D); Hyperolius leucotaeniis (EN, D); Hyperolius nienkouensis (EN, D); Hyperolius nimbae (EN, D); Hyperolius pickersgilli (CR, U); Hyperolius punctulatus (EN, D); Hyperolius rubrovermiculatus (EN, D); Hyperolius tannerorum (EN, D); Hyperolius thomensis (EN, D); Hyperolius torrentis (EN, D); Hyperolius watsonae (CR, D); Kassina jozani (EN, D); Leiopelma archeyi (CR, D); Leiopelma hamiltoni (EN, S); Leptodactylus fallax (CR, D); Leptodactylus magistris (CR, D); Leptodactylus silvanimbus (CR, D); Physalaemus soaresi (EN, D); Pleurodema somuncurensis (CR, D); Philoria frosti (CR, D); Philoria kundagungan (EN, D); Philoria loveridgei (EN, D); Philoria pughi (EN, D); Philoria richmondensis (EN, D); Philoria sphagnicolus (EN, D); Aglyptodactylus laticeps (EN, D); Boehmantis microtypanum (EN, D); Boophis tampoka (EN, D); Boophis williamsi (CR, D); Gephyromantis azurrae (EN, D); Gephyromantis corvus (EN, D); Gephyromantis horridus (EN, D); Gephyromantis runewsweeki (EN, D); Gephyromantis silvanus (EN, D); Gephyromantis webbi (EN, D); Mantella aurantiaca (CR, D); Mantella bernhardi (EN, D); Mantella cowanii (CR, D); Mantella crocea (EN, D); Mantella expectata (EN, D); Mantella milotympanum (CR, D); Mantella viridis (EN, D); Mantidactylus madecassus (EN, D); Mantidactylus pauliani (CR, D); Spinomantis brunae (EN, D); Spinomantis guibei (EN, D); Spinomantis microtis (EN, D); Leptobranchella palmata (CR, D); Leptobranchium boringii (EN, D); Leptobranchium echinatum (EN, D); Leptobranchium leishanense (EN, D); Leptolalax alpinus (EN, D); Megophrys ligayae (EN, D); Oreolalax chuanbeiensis (EN, D); Oreolalax liangbeiensis (CR, D); Oreolalax omeimontis (EN, D); Oreolalax pingii (EN, D); Oreolalax puxiongensis (EN, D); Scutigera chintingensis (EN, D); Scutigera maculatus (CR, D); Scutigera muliensis (EN, D); Scutigera ningshanensis (EN, D); Scutigera pingwuensis (EN, D); Xenophrys brachykolos (EN, D); Micrixalus gadgili (EN, D); Micrixalus kottigeharensis (CR, D); Albericus siegfriedi (CR, D); Anodonhyla hutchisoni (EN, D); Anodonhyla rouxae (EN, U); Anodonhyla vallani (CR, U); Callulops kopsteini (EN, D); Chiasmocleis carvalhoi (EN, D); Cophixalus concinnus (CR, S); Cophixalus mcdonaldi (EN, U); Cophixalus monticola (EN, U); Cophixalus neglectus (EN, D); Cophyla berara (CR, D); Hoplophryne rogersi (EN, U); Hoplophryne uluguruensis (EN, U); Kalophrynus palmatissimus (EN, D); Madecassophryne truebae (EN, D); Melanobatrachus indicus (EN, D); Melanophryne carpish (EN, U); Microhyla karunaratnei (CR, D); Microhyla sholigari (EN, D); Microhyla zeylanica (EN, D); Micryletta steinigeri (EN, D); Oreophryne monticola (EN, D); Parhoplophryne usambarica (CR, D); Platypelis alticola (EN, D); Platypelis mavomavo (EN, D); Platypelis milloti (EN, D); Platypelis tetra (EN, D); Plethodontohyla brevipes (EN, D); Plethodontohyla fonetana (EN, U); Ramanella marmorata (EN, D); Ramanella palmata (EN, D); Rhombophryne guentherpetersi (EN, D); Scaphiophryne boribory (EN, D); Scaphiophryne gottlebei (EN, D); Stumpffia helenae (CR, D); Geocrinia alba (CR, D); Mixophyes fleayi (EN, D); Mixophyes iteratus (EN, D); Pseudophryne covacevichae (EN, D); Pseudophryne pengillyi (EN, D); Taudactylus acutirostris (CR, D); Taudactylus eungellensis (CR, D); Taudactylus pleione (CR, D); Taudactylus rheophilus (CR, U); Nasikabatrachus sahyadrensis (EN, D); Nyctibatrachus aliciae (EN, D); Nyctibatrachus beddomii (EN, D); Nyctibatrachus dattatreyaensis (CR, U); Nyctibatrachus karnatakaensis (EN, U); Nyctibatrachus minor (EN, D); Nyctibatrachus sanctipalustris (EN, D); Nyctibatrachus vasanthi (EN, D); Proceratophrys moratoi (CR, D); Pelobates varaldii (EN, D); Petropedetes dutoiti (CR, D); Petropedetes martiensseni (EN, U); Petropedetes palmipes (EN, D); Petropedetes perreti (EN, D); Petropedetes yakusini (EN, U); Phrynobatrachus annulatus (EN, D); Phrynobatrachus chukuchuku (CR, U); Phrynobatrachus ghanensis (EN, D); Phrynobatrachus intermedius (CR, U); Phrynobatrachus irangi (EN, D); Phrynobatrachus krefftii (EN, U); Phrynobatrachus pakenhami (EN, D); Phrynobatrachus ungujuae (EN, D); Pipa myersi (EN, U); Xenopus gilli (EN, U); Xenopus itombwensis (CR, S); Xenopus longipes (CR, S); Ptychadena broadleyi (EN, D); Ptychadena nana (EN, S); Ptychadena newtoni (EN, D); Amietia inyangae (EN, D); Amietia johnstoni (EN, D); Anhydrophryne ngongoniensis (EN, S); Anhydrophryne rattrayi (EN, D); Arthroleptella rugosa (CR, D); Arthroleptella subvoce (EN, U); Ericabatrachus baleensis (CR, U); Microbatrachella capensis (CR, D); Natalobatrachus bonebergi (EN, D); Nothophryne broadleyi (EN, D); Amolops hainanensis (EN, D); Amolops hongkongensis (EN, D); Babina holsti (EN, D); Babina okinavana (EN, D); Babina subaspera (EN, D); Glandirana minima (CR, D); Hylarana asperima (EN, D); Hylarana mangyanum (EN, D); Hylarana occidentalis (EN, D); Lithobates chichicuahutla (CR, D); Lithobates dunnii (EN, D); Lithobates johnei (EN, D); Lithobates omiltemanus (CR, D); Lithobates onca (EN, D); Lithobates pueblae (CR, D); Lithobates sevosus (CR, D); Lithobates subaquavocalis (CR, D); Lithobates tlaloci (CR, D); Odorrana amamiensis (EN, D); Odorrana ishikawae (EN, D); Odorrana kuangwuensis (EN, D); Odorrana narina (EN, D); Odorrana narina (EN, D); Odorrana supranarina (EN, D); Odorrana utsunomiyaorum (EN, D); Odorrana wuchuanensis (CR, D); Pelophylax cerigensis (CR, D); Pelophylax cretensis (EN, D); Pelophylax shqipericus (EN, D); Pelophylax tenggerensis (EN, D); Rana chevronta (CR, D); Rana holtzi (CR, D); Rana muscosa (EN, D); Rana pyrenaica (EN, D); Rana sauteri (EN, D); Rana sierrae (EN, D); Rana tavasensis (EN, D); Indirana brachytarsus (EN, D); Indirana diplosticta (EN, D); Indirana gundia (CR, D); Indirana leptodactyla (EN, D); Indirana phrynoderma (CR, D); Ghatixalus variabilis (EN, S); Gracixalus quyeti (EN, U); Liuixalus ocellatus (EN, D); Liuixalus romeri (EN, D); Philautus aurantium (EN, D); Philautus disgregus (EN, D); Philautus jacobsoni (CR, D); Philautus kerangae (EN, D); Philautus neelanethrus (EN, D); Philautus sanctisilvaticus (CR, D); Philautus schmackeri (EN, D); Philautus similis (EN, D); Philautus surruffus (EN, D); Polypedates eques (EN, D); Polypedates fastigo (CR, D); Polypedates insularis (EN, U); Polypedates longinasus (EN, D); Pseudophilautus alto (EN, D); Pseudophilautus amboli (CR, D); Pseudophilautus asankai (EN, D); Pseudophilautus auratus (EN, D); Pseudophilautus caeruleus (EN, D); Pseudophilautus cavirostris (EN, D); Pseudophilautus cuspis (EN, D); Pseudophilautus decoris (EN, D); Pseudophilautus femoralis (EN, D); Pseudophilautus folicola (EN, D); Pseudophilautus frankenbergi (EN, D); Pseudophilautus fulvus (EN, D); Pseudophilautus hoffmanni (EN, D); Pseudophilautus ilimbis (CR, D); Pseudophilautus lunatus (CR, D); Pseudophilautus macropus (CR, D); Pseudophilautus microtypanum (EN, D); Pseudophilautus mittermeieri (EN, D); Pseudophilautus mooreorum (EN, D); Pseudophilautus nemus (CR, D); Pseudophilautus ocularis (EN, D); Pseudophilautus papillosus (CR, D); Pseudophilautus pleurotaenia (EN, D); Pseudophilautus poppiae (EN, D); Pseudophilautus procax (CR, D); Pseudophilautus reticulatus (EN, D); Pseudophilautus sarasinorum (EN, D); Pseudophilautus schmarda (EN, D); Pseudophilautus silus (EN, D); Pseudophilautus silvaticus (EN, D); Pseudophilautus simba (CR, D); Pseudophilautus singu (EN, U); Pseudophilautus steineri (EN, D); Pseudophilautus stuarti (EN, D); Pseudophilautus tanu (EN, U); Pseudophilautus wynaadensis (EN, D); Pseudophilautus zorro (EN, D); Raorchestes chalazodes (CR, D); Raorchestes charius (EN, D); Raorchestes chlorosomma (CR, U); Raorchestes griet (CR, D);

**S7 Table continued**

Raorchestes kaikatti (CR, D); Raorchestes marki (CR, D); Raorchestes munnarensis (CR, D); Raorchestes nerostagona (EN, D); Raorchestes ponmudi (CR, D); Raorchestes resplendens (CR, D); Raorchestes shillongensis (CR, D); Raorchestes signatus (EN, D); Raorchestes sushili (CR, U); Raorchestes tinniens (EN, D); Raorchestes viridis (EN, D); Rhacophorus angulirostris (EN, D); Rhacophorus arvalis (EN, D); Rhacophorus aurantiventris (EN, D); Rhacophorus calcadensis (EN, D); Rhacophorus lateralis (EN, D); Rhacophorus minimus (EN, D); Rhacophorus pseudomalabaricus (CR, D); Rhacophorus yaoshanensis (EN, D); Theloderma bicolor (EN, U); Sechelophryne gardineri (EN, D); Sechelophryne pipilodryas (CR, U); Sooglossus sechellensis (EN, D); Sooglossus thomasseti (CR, U); Telmatobius atacamensis (CR, D); Telmatobius brachydactylus (EN, D); Telmatobius brevipes (EN, D); Telmatobius brevirostris (EN, D); Telmatobius ceiorum (EN, D); Telmatobius cirrhacelis (CR, D); Telmatobius colanensis (EN, U); Telmatobius culeus (CR, D); Telmatobius degener (EN, U); Telmatobius edaphonastes (EN, D); Telmatobius espadai (CR, D); Telmatobius gigas (CR, D); Telmatobius hypselocephalus (EN, D); Telmatobius ignavus (EN, D); Telmatobius laticeps (EN, D); Telmatobius latirostris (EN, D); Telmatobius macrostomus (EN, D); Telmatobius mayoloi (EN, D); Telmatobius necopinus (EN, D); Telmatobius pefauri (CR, D); Telmatobius pisanoi (EN, D); Telmatobius platycephalus (EN, D); Telmatobius punctatus (CR, D); Telmatobius schreiteri (EN, D); Telmatobius scrocchii (EN, D); Telmatobius sibiricus (EN, D); Telmatobius stephani (EN, D); Telmatobius thompsoni (EN, U); Telmatobius truebae (EN, U); Telmatobius vellardi (CR, D); Telmatobius zapahuirensis (CR, D); Ambystoma altamirani (EN, D); Ambystoma amblycephalum (CR, D); Ambystoma andersoni (CR, D); Ambystoma dumerilii (CR, D); Ambystoma granulorum (CR, D); Ambystoma leorae (CR, D); Ambystoma lermaense (CR, D); Ambystoma ordinarium (EN, D); Ambystoma taylori (CR, U); Batrachuperus londongensis (EN, D); Hynobius abei (CR, D); Hynobius amjiensis (CR, D); Hynobius chinensis (EN, D); Hynobius dunni (EN, D); Hynobius formosanus (EN, D); Hynobius hidamontanus (EN, D); Hynobius okiensis (CR, D); Hynobius sonani (EN, D); Hynobius takedai (EN, D); Hynobius yangi (EN, D); Pachyhynobius yunanicus (EN, D); Paracetylon gorganensis (CR, D); Paracetylon mustersi (CR, D); Ranodon sibiricus (EN, D); Batrachoseps campi (EN, D); Bolitoglossa alvaradoi (EN, D); Bolitoglossa capitana (CR, D); Bolitoglossa carri (CR, D); Bolitoglossa celaque (EN, D); Bolitoglossa compacta (EN, D); Bolitoglossa conanti (EN, D); Bolitoglossa decora (CR, D); Bolitoglossa diaphora (CR, D); Bolitoglossa dunni (EN, D); Bolitoglossa engelhardti (EN, D); Bolitoglossa flavimembris (EN, D); Bolitoglossa flaviventris (EN, D); Bolitoglossa franklini (EN, D); Bolitoglossa heiroreias (EN, U); Bolitoglossa longissima (CR, D); Bolitoglossa magnifica (EN, D); Bolitoglossa marmorea (EN, D); Bolitoglossa meliana (EN, D); Bolitoglossa minutula (EN, D); Bolitoglossa nigrescens (EN, D); Bolitoglossa odonnelli (EN, D); Bolitoglossa oresbia (CR, D); Bolitoglossa pandi (EN, D); Bolitoglossa porrasorum (EN, D); Bolitoglossa riletii (EN, D); Bolitoglossa salvinii (EN, D); Bolitoglossa sooyorum (EN, D); Bolitoglossa spongai (EN, D); Bolitoglossa subpalmata (EN, D); Bolitoglossa synoria (CR, U); Bolitoglossa tica (EN, D); Bolitoglossa veracrucis (EN, D); Bradytriton silus (CR, D); Chiropterotriton arboreus (CR, D); Chiropterotriton chiropter (CR, D); Chiropterotriton chondrostega (EN, D); Chiropterotriton cracens (EN, D); Chiropterotriton dimidiatus (EN, D); Chiropterotriton laevis (CR, U); Chiropterotriton magnipes (CR, D); Chiropterotriton multidentatus (EN, D); Chiropterotriton terrestris (CR, U); Cryptotriton adelos (EN, D); Cryptotriton alvarezdelatoroi (EN, D); Cryptotriton monzoni (CR, D); Cryptotriton nasalis (EN, S); Cryptotriton veraepaci (CR, D); Cryptotriton wakei (CR, D); Dendrotriton bromeliaci (CR, D); Dendrotriton chujorum (CR, S); Dendrotriton cuchumatanus (CR, D); Dendrotriton kekchiorum (EN, U); Dendrotriton rabbi (CR, S); Eurycea naufragia (EN, D); Eurycea tonkawae (EN, D); Gyrinophilus gulolineatus (EN, D); Gyrinophilus subterraneus (EN, U); Nototriton barbouri (EN, D); Nototriton brodiei (CR, D); Nototriton lignicola (CR, D); Nototriton limnospectator (EN, D); Nototriton major (CR, D); Nyctanolis pernix (EN, D); Oedipina altura (CR, D); Oedipina carablanca (EN, U); Oedipina gephyra (EN, D); Oedipina gracilis (EN, D); Oedipina grandis (EN, D); Oedipina maritima (CR, D); Oedipina paucidentata (CR, D); Oedipina poelzi (EN, D); Oedipina pseudouniformis (EN, D); Oedipina stenopodia (EN, D); Oedipina tomasi (CR, D); Parvimolge townsendi (CR, D); Phaeognathus hubrichti (EN, D); Plethodon stormi (EN, D); Plethodon welleri (EN, D); Pseudoeurycea ahuitzoti (CR, D); Pseudoeurycea altamontana (EN, D); Pseudoeurycea anitae (CR, U); Pseudoeurycea aquatica (CR, D); Pseudoeurycea brunnata (CR, D); Pseudoeurycea cochraniae (EN, D); Pseudoeurycea conanti (EN, U); Pseudoeurycea expectata (CR, D); Pseudoeurycea firscheini (EN, D); Pseudoeurycea gadovii (EN, D); Pseudoeurycea gigantea (CR, D); Pseudoeurycea goebeli (CR, D); Pseudoeurycea juarezi (CR, D); Pseudoeurycea lineola (EN, D); Pseudoeurycea longicauda (EN, D); Pseudoeurycea lynchi (CR, D); Pseudoeurycea melanomolga (EN, D); Pseudoeurycea mystax (EN, D); Pseudoeurycea naucampatepetl (CR, D); Pseudoeurycea nigra (CR, D); Pseudoeurycea nigromaculata (CR, D); Pseudoeurycea orchileucos (EN, D); Pseudoeurycea orchimelas (EN, D); Pseudoeurycea parva (CR, D); Pseudoeurycea praecellens (CR, D); Pseudoeurycea rex (CR, D); Pseudoeurycea robertsi (CR, S); Pseudoeurycea saltator (CR, D); Pseudoeurycea smithi (CR, D); Pseudoeurycea tenchalli (EN, D); Pseudoeurycea teotepec (EN, D); Pseudoeurycea tlahcuiloh (CR, D); Pseudoeurycea unguidentis (CR, D); Pseudoeurycea werleri (EN, D); Speleomantes supramontis (EN, D); Thorius arboreus (EN, D); Thorius aureus (CR, D); Thorius boreas (EN, D); Thorius dubitus (EN, D); Thorius grandis (EN, D); Thorius infernalis (CR, D); Thorius lunaris (EN, D); Thorius magnipes (CR, D); Thorius minutissimus (CR, D); Thorius minydemus (CR, U); Thorius munificus (CR, U); Thorius narismagnus (CR, D); Thorius narisovalis (CR, D); Thorius omiltemi (EN, D); Thorius papaloe (EN, D); Thorius pennatulus (CR, D); Thorius pulmonaris (EN, D); Thorius schmidti (EN, D); Thorius smithi (CR, U); Thorius spilogaster (CR, D); Thorius troglodytes (EN, D); Neotriton alabamensis (EN, D); Calotriton arnoldi (CR, D); Cynops ensicauda (EN, D); Cynops orphicus (EN, D); Echinotriton andersoni (EN, D); Echinotriton chinhaiensis (CR, D); Euproctus platycephalus (EN, D); Lyciasalamandra antalyana (EN, D); Lyciasalamandra atifi (EN, S); Lyciasalamandra billae (CR, D); Lyciasalamandra fazilae (EN, S); Lyciasalamandra flavimembris (EN, D); Neuregerus kaiserii (CR, D); Neuregerus microspilotus (CR, D); Notophthalmus meridionalis (EN, D); Paramesotriton guanxiensis (EN, D); Pleurodeles poireti (EN, D); Tylotriton hainanensis (EN, D); Boulengerula changamwensis (EN, U); Boulengerula niedeni (EN, U); Boulengerula taitana (EN, D); Grandisonia brevis (EN, U); Prasinia cooperi (EN, U)

**AVES:** Anas bernieri (EN, D); Anas chlorotis (EN, I); Anas laysanensis (CR, I); Anas melleri (EN, D); Anas nesiotis (EN, I); Anas wyvilliana (EN, D); Aythya baeri (CR, D); Aythya innotata (CR, S); Branta ruficollis (EN, D); Cairina scutulata (EN, D); Melanitta fusca (EN, D); Mergus octosetaceus (CR, D); Mergus squamatus (EN, D); Oxyura leucocephala (EN, D); Rhodonessa caryophyllacea (CR, U); Tadorna cristata (CR, U); Collocalia bartschi (EN, D); Aglaeactis aliciae (EN, D); Aglaeactis berlepschi (EN, D); Amazilia boucardi (EN, D); Amazilia castaneiventris (EN, D); Amazilia luciae (EN, D); Campylopterus phainopeplus (EN, D); Chaetocercus berlepschi (EN, D); Coeligena orina (CR, D); Eriocnemis godini (CR, U); Eriocnemis isabellae (CR, D); Eriocnemis mirabilis (CR, D); Eriocnemis nigrivestis (CR, D); Eulidia yarrellii (EN, D); Eupherusa cyanophrys (EN, D); Glaucis dohrnii (EN, D); Heliangelus regalis (EN, D); Hylonompha macrocerca (EN, D); Lepidopyga lilliae (CR, D); Loddigesia mirabilis (EN, D); Lophornis brachylophus (CR, D); Metallura baroni (EN, D); Metallura iracunda (EN, D); Ramphomicron dorsale (EN, D); Selasphorus ardens (EN, D); Sephanoides fernandensis (CR, D); Taphrolesia griseiventris (EN, D); Aegothales savasi (CR, D); Caprimulgus noctitherus (EN, D); Caprimulgus prigoginei (EN, D); Eleothreptus candicans (EN, D); Siphonorhis americana (CR, U); Brachyrhamphus brevirostris (CR, D); Charadrius obscurus (EN, I); Charadrius sanctaehelenae (CR, I); Thinornis novaeseelandiae (EN, I); Vanellus gregarius (CR, D); Vanellus macropterus (CR, U); Rhinoptilus bitorquatus (CR, D); Haematopus chathamensis (EN, I); Larus bulleri (EN, D); Sterna acuticauda (EN, D); Sterna albobristata (EN, D); Sterna bernsteini (CR, D); Sterna lorata (EN, D); Pedionomus torquatus (EN, D); Himantopus novaeseelandiae (CR, I); Rostratula australis (EN, D); Eurynorhynchus pygmeus (CR, D); Numenius borealis (CR, U); Numenius tenuirostris (CR, D); Prosonia cancellata (EN, D); Scolopax rochussenii (EN, D); Tringa guttifer (EN, D); Ardea humbloti (EN, D); Ardea ignis (CR, D); Ardeola idae (EN, D); Botaurus poiciloptilus (EN, D); Gorsachius goisagi (EN, D); Gorsachius magnificus (EN, D); Ciconia boyciana (EN, D); Ciconia stormi (CR, D); Leptoptilos dubius (EN, D); Mycteria cinerea (EN, D); Bostrychia bocagei (CR, D); Nipponia nippon (EN, I); Platalea minor (EN, S); Pseudibis davisoni (CR, D); Thaumatis gigas (CR, D); Threskiornis bernieri (EN, D); Claravis geoffroyi (CR, D); Columba argentina (CR, D); Columba thomensis (EN, D); Columba cyanopsis (CR, D); Didunculus strigirostris (EN, D); Ducula aurorae (EN, I); Ducula cineracea (EN, D); Ducula galeata (EN, I); Ducula mindorensis (EN, D); Gallicolumba erythroptera (CR, D); Gallicolumba hoedtii (EN, D); Gallicolumba keayi (CR, D); Gallicolumba menagei (CR, D); Gallicolumba platenae (CR, D); Gallicolumba sanctaecrucis (EN, D); Geotrygon carrikeri (EN, D); Leptotila conoveri (EN, D); Leptotila wellsi (CR, D); Nesoenas mayeri (EN, D); Paphitreron cinereiceps (EN, D); Ptilinopus arcanus (CR, D); Ptilinopus roseicapilla (EN, D); Staronenas cyanocephala (EN, D); Treron psittaceus (EN, D); Todiramphus gambieri (CR, D); Todiramphus godeffroyi (CR, D); Aceros narcondami (EN, S); Aceros waldeni (CR, D); Anthracoceros montani (CR, D); Penelopides mindorensis (EN, D); Penelopides panini (EN, D); Carpococcyx viridis (CR, D); Centropus steerii (CR, D); Cocyzyus ruficularis (EN, D); Neomorphus radiolus (EN, D); Tauraco bannermani (EN, D); Accipiter gundlachi (EN, D); Buteo ridgwayi (CR, D); Chondrohierax wilsonii (CR, D); Circus maillardi (EN, D); Eutriorchis astur (EN, D); Gyps africanus (EN, D); Gyps bengalensis (CR, D); Gyps indicus (CR, D); Gyps rueppellii (EN, D); Gyps tenuirostris (CR, D); Haliaeetus vociferoides (CR, D); Leptodon forbesi (CR, D); Leucopertnis occidentalis (EN, D); Necrosyrtes monachus (EN, D); Nisaetus bartelsi (EN, D);

**S7 Table continued**

Nisaetus floris (CR, D); Sarcogyps calvus (CR, D); Crax alberti (CR, D); Crax blumenbachii (EN, D); Crax globulosa (EN, D); Oreophasis derbianus (EN, D); Pauxi pauxi (EN, D); Pauxi unicornis (EN, D); Penelope albipennis (CR, D); Penelope ortoni (EN, D); Penelope perspicax (EN, D); Pipile jacutinga (EN, D); Pipile pipile (CR, D); Aepyodius bruijnii (EN, D); Megapodius laperouse (EN, D); Megapodius pritchardii (EN, D); Odontophorus strophium (EN, D); Arborophila rufipectus (EN, D); Centrocerus minimus (EN, D); Francolinus camerunensis (EN, D); Francolinus nahani (EN, D); Francolinus ochropectus (CR, D); Francolinus swierstrai (EN, D); Lophura edwardsi (CR, D); Lophura hatinhensis (EN, D); Ophrysia superciliosa (CR, U); Pavo muticus (EN, D); Perdica manipurensis (EN, D); Polyplectron katsumatae (EN, D); Polyplectron schleiermacheri (EN, D); Xenoperdix udzungwensis (EN, S); Balaerica regulorum (EN, D); Grus japonensis (EN, D); Heliopais personatus (EN, D); Houbaropsis bengalensis (CR, D); Neotis ludwigii (EN, D); Sypheotides indicus (EN, D); Psophia viridis (EN, D); Amaurornis olivieri (EN, D); Cyanolimnas cerverai (CR, D); Gallinula pacifica (CR, U); Gallinula silvestris (CR, U); Gallirallus lafresnayanus (CR, U); Gallirallus okinawae (EN, D); Gallirallus sylvestris (EN, S); Gymnocrex talaudensis (EN, D); Laterallus levraudi (EN, D); Laterallus tuerosi (EN, D); Rallus semiplumbeus (EN, D); Rallus wetmorei (EN, D); Sarothrura ayresi (CR, D); Sarothrura watersi (EN, D); Turnix olivii (EN, D); Mohoua ochrocephala (EN, D); Alauda razae (CR, S); Heteromirafra archeri (CR, D); Heteromirafra sidamoensis (CR, D); Mirafra asi (EN, D); Spizocorys fringillaris (EN, D); Atrichornis clamorus (EN, D); Atrichornis rufescens (EN, D); Coracina newtoni (CR, D); Amaurospiza carrizalensis (CR, D); Habia atrimaxillaris (EN, D); Apalis flavigularis (EN, D); Apalis fuscigularis (CR, D); Cisticola aberdare (EN, D); Colluricincla sanghirensis (CR, D); Cissa thalassina (CR, D); Corvus florensis (EN, D); Corvus kubaryi (CR, D); Corvus unicolor (CR, D); Zavattariornis stresemanni (EN, D); Calyptura cristata (CR, D); Carpodectes antoniae (EN, D); Cephalopterus glabricollis (EN, D); Cotinga maculata (EN, D); Lipaugus weberi (EN, D); Pachyrhamphus spodiurus (EN, D); Phibalura boliviana (EN, D); Phytotoma raimondii (EN, D); Xipholena atropurpurea (EN, D); Dasyornis brachypterus (EN, D); Dasyornis longirostris (EN, D); Dicaeum quadricolor (CR, D); Dicrurus fuscipennis (EN, S); Dicrurus menagei (EN, D); Atlapetes blancae (CR, U); Atlapetes flaviceps (EN, D); Atlapetes melanopsis (EN, D); Atlapetes pallidiceps (EN, I); Camarhynchus heliobates (CR, D); Camarhynchus pauper (CR, D); Emberiza aureola (EN, D); Emberiza jankowskii (EN, D); Gubernatrix cristata (EN, D); Melanospiza richardsoni (EN, D); Nesospiza wilkinsi (EN, S); Poospiza alticola (EN, D); Poospiza rubecula (EN, D); Rowettia goughensis (CR, D); Spizella wortheni (EN, D); Sporophila melanops (CR, U); Sporophila palustris (EN, D); Torreornis inexpectata (EN, D); Xenospiza baileyi (EN, D); Grallaria chthonia (CR, D); Grallaria fenwickorum (CR, D); Grallaria kaestneri (EN, D); Grallaria ridgelyi (EN, D); Grallarica ochraceifrons (EN, D); Carduelis johannis (EN, D); Hemignathus lucidus (CR, U); Hemignathus munroi (EN, D); Loxia megaplaga (EN, D); Loxioides bailleui (CR, D); Loxops coccineus (CR, D); Loxops coccineus (EN, D); Melamprosops phaeosoma (CR, D); Neospiza concolor (CR, D); Oreomystis bairdi (CR, D); Oreomystis mana (EN, D); Palmeria dolei (CR, D); Paroreomyza maculata (CR, U); Paroreomyza montana (EN, D); Pseudonestor xanthophrys (CR, D); Pyrrhula murina (EN, S); Serinus flavigula (EN, D); Telespiza ultima (CR, S); Aphrastura masafuerae (CR, S); Asthenes perijana (EN, D); Cinclodes aricomae (CR, D); Cinclodes palliatus (CR, D); Cranioleuca henricae (EN, D); Cranioleuca muelleri (EN, D); Leptasthenura xenothorax (EN, D); Philydor novaesi (CR, D); Synallaxis infuscata (EN, D); Synallaxis kollari (CR, D); Synallaxis maranonica (CR, D); Synallaxis tithys (EN, D); Synallaxis zimmeri (EN, D); Eurochelidon sirintarae (CR, D); Progne modesta (EN, D); Tachycineta cyaneoviridis (EN, D); Agelaius tricolor (EN, D); Agelaius xanthomus (EN, D); Caccicus koeppckeae (EN, D); Curaeus forbesi (EN, D); Icterus northropi (CR, D); Icterus oberi (CR, S); Macroagelaius subalaris (EN, D); Nesopsar nigerrimus (EN, D); Psarocolius cassini (EN, D); Lanius newtoni (CR, D); Laniarius amboimensis (EN, D); Laniarius brauni (EN, D); Malaconotus alius (CR, S); Prionops gabela (EN, D); Telophorus kupeensis (EN, D); Stipiturus mallee (EN, D); Gymnypus aubryana (CR, D); Manorina melanotis (EN, D); Mimus graysoni (CR, S); Mimus melanotis (EN, D); Mimus trifasciatus (CR, S); Ramphocinclus brachyurus (EN, D); Toxostoma guttatum (CR, D); Chasiempis ibidis (EN, D); Clytorhynchus sanctaerucis (EN, D); Eutrichomyias rowleyi (CR, D); Metabolus rugensis (EN, D); Monarcha boanensis (CR, D); Monarcha brehmii (EN, D); Monarcha melanopsis (EN, D); Monarcha everetti (EN, D); Pomarea mendozae (EN, S); Pomarea mira (CR, U); Pomarea nigra (CR, I); Pomarea whitneyi (CR, D); Terpsiphone corvina (CR, I); Anthus sokokensis (EN, D); Macronyx sharpei (EN, D); Copsychus cebuensis (EN, D); Copsychus sechellarum (EN, I); Cyornis ruckii (CR, U); Cyornis sanfordi (EN, D); Ficedula bonthaina (EN, D); Humblotia flavirostris (EN, D); Luscinia ruficeps (EN, D); Monticola erythronotus (EN, D); Myiomela albiventris (EN, D); Myiomela major (EN, D); Rhinomyias albigularis (EN, D); Sheppardia aurantiithorax (EN, D); Sheppardia gabela (EN, D); Sheppardia montana (EN, D); Aethopyga duyvenbodei (EN, D); Anthreptes pallidigaster (EN, D); Nectarinia loveridgei (EN, D); Oriolus isabellae (CR, D); Oriolus mellianus (EN, D); Pardalotus quadragintus (EN, D); Basileuterus griseiceps (EN, D); Catharopiza bishopi (EN, D); Dendroica chrysoparia (EN, D); Geothlypis beldingi (EN, D); Geothlypis speciosa (EN, D); Leucopiza semperi (CR, U); Myioborus pariae (EN, D); Vermivora bachmanii (CR, U); Antilophia bokermanni (CR, D); Pitta gurneyi (EN, D); Pitta superba (EN, D); Platysteira laticincta (EN, D); Foudia rubra (EN, S); Malimbus ballmanni (EN, D); Malimbus ibadanensis (EN, D); Ploceus aureonucha (EN, D); Ploceus batesi (EN, D); Ploceus golangi (EN, D); Ploceus nicolli (EN, D); Polioptila clementsi (CR, D); Chlorocichla prigoginei (EN, D); Ixos siquijorensis (EN, D); Phyllastrephus leucolepis (CR, D); Eleoscytalopus psychopompus (CR, D); Merulaxis stresemanni (CR, D); Scytalopus canus (EN, D); Scytalopus iraiensis (EN, D); Scytalopus robbinsi (EN, D); Scytalopus rodriguezii (EN, D); Sitta ledanti (EN, D); Sitta magna (EN, D); Sitta victoriae (EN, D); Aplonis brunneicapillus (EN, D); Aplonis pelzelni (CR, D); Leucopsar rothschildi (CR, D); Sturnus melanopterus (CR, D); Acrocephalus aequinoctialis (EN, D); Acrocephalus brevipennis (EN, D); Acrocephalus caffer (EN, D); Acrocephalus familiaris (CR, S); Acrocephalus griseldis (EN, D); Acrocephalus luscinius (CR, D); Acrocephalus sorghophilus (EN, D); Acrocephalus vaughani (EN, D); Artisornis moreaui (CR, D); Bradypterus graueri (EN, D); Eremomela turneri (EN, D); Hyltiota usambara (EN, D); Macrosphenus pulitzeri (EN, D); Trichocichla rufa (EN, S); Cerccomacra carbonaria (CR, D); Clytoctantes alixii (EN, D); Formicivora erythronotus (EN, D); Formicivora littoralis (EN, D); Herpsilochmus parkeri (EN, D); Myrmeciza ruficauda (EN, D); Myrmotherula fluminensis (CR, D); Myrmotherula snowi (CR, D); Pyriglena atra (EN, D); Rhopornis ardesiacus (EN, D); Stymphalornis acutirostris (EN, D); Terenura sharpei (EN, D); Terenura sicki (EN, D); Bangsia aureocincta (EN, D); Buthraupis aureodorsalis (EN, D); Compsospiza garleppi (EN, D); Conothraupis mesoleuca (CR, D); Diglossa gloriosissima (EN, D); Diglossa venezuelensis (EN, D); Nemosia rourei (CR, D); Tangara cabanisi (EN, D); Crocias langbianis (EN, D); Dasyrocotapha speciosa (EN, D); Garrulax courtroisii (CR, D); Garrulax rufifrons (EN, D); Garrulax yersini (EN, D); Kupeornis gilberti (EN, D); Rimator pasquieri (CR, D); Stachyris nigrorum (EN, D); Strophocincla cachinnans (EN, D); Cistothorus apolarini (EN, D); Ferminia cerverai (EN, D); Henicorhina negreti (CR, D); Thryothorus nicefori (CR, D); Troglodytes monticola (CR, D); Alethe choloensis (EN, D); Myadestes lanaiensis (CR, U); Myadestes palmeri (CR, I); Myiophonus blighi (EN, D); Turdus helleri (CR, D); Turdus swalesi (EN, D); Turdus xanthorhynchus (CR, D); Zoothera guttata (EN, D); Anairetes alpinus (EN, D); Hemitriccus kaempferi (EN, D); Myiarchus semirufus (EN, D); Myiotheretes pernix (EN, D); Phylloscopus urichi (EN, D); Phylloscartes beckeri (EN, D); Phylloscartes ceciliae (EN, D); Phylloscartes lanyoni (EN, D); Phylloscartes roquettei (EN, D); Poecilotriccus luluae (EN, D); Tyrannus cubensis (EN, D); Xenopirostris damii (EN, D); Vireo masteri (EN, D); Cleptornis marchei (CR, D); Madanga ruficollis (EN, D); Rukia ruki (EN, D); Zosterops albobogarii (CR, D); Zosterops chloronothus (CR, D); Zosterops conspicillatus (EN, D); Zosterops luteirostris (EN, D); Zosterops modestus (EN, I); Zosterops nehrkorni (CR, D); Zosterops rotensis (CR, D); Fregata andrewsi (CR, D); Phalacrocorax capensis (EN, D); Phalacrocorax featherstoni (EN, D); Phalacrocorax neglectus (EN, D); Phalacrocorax onslowi (CR, D); Papasula abbotti (EN, D); Celeus obrieni (EN, D); Dendrocopos noguchii (CR, D); Picumnus steindachneri (EN, D); Picumnus varzeae (EN, S); Aulacorhynchus huallagae (EN, D); Podiceps gallardoi (CR, D); Podiceps taczanowskii (CR, D); Rollandia microptera (EN, D); Diomedea amsterdamensis (CR, D); Diomedea dabbenena (CR, D); Diomedea sanfordi (EN, D); Phoebeastria irrorata (CR, D); Phoebeastria fusca (EN, D); Thalassarche carteri (EN, D); Thalassarche chlororhynchus (EN, D); Thalassarche chrysostoma (EN, D); Nesofregatta fuliginosa (EN, D); Oceanites maorianus (CR, U); Oceanodroma homochroa (EN, D); Oceanodroma macrodactyla (CR, U); Pelecanoides garnotii (EN, D); Pseudobulweria aterrima (CR, D); Pseudobulweria becki (CR, D); Pseudobulweria macgillivrayi (CR, D); Pterodroma alba (EN, D); Pterodroma atrata (EN, D); Pterodroma axillaris (EN, I); Pterodroma barau (EN, D); Pterodroma cahow (EN, I); Pterodroma caribbaea (CR, U); Pterodroma hasitata (EN, D); Pterodroma incerta (EN, D); Pterodroma madeira (EN, S); Pterodroma magentae (CR, I); Pterodroma phaeopygia (CR, D); Puffinus auricularis (CR, D); Puffinus huttoni (EN, S); Puffinus mauretanicus (CR, D); Puffinus newelli (EN, D); Amazona imperialis (EN, I); Amazona oratrix (EN, D); Amazona rhodocorytha (EN, D); Amazona vinacea (EN, D); Amazona viridigenalis (EN, D); Amazona vittata (CR, I); Anodorhynchus glaucus (CR, U); Anodorhynchus leari (EN, U); Ara ambiguus (EN, D); Ara glaucogularis (CR, S); Ara rubrogenys (EN, D); Aratinga brevipes (EN, D); Aratinga solstitialis (EN, D); Brotogeris pyrrhoptera (EN, D); Cacatua haematuropygia (CR, D); Cacatua sulphurea (CR, D); Calyptorhynchus baudinii (EN, D); Calyptorhynchus latirostris (EN, D); Chamosyna amabilis (CR, D); Chamosyna diadema (CR, U); Chamosyna toxopei (CR, D); Cyanopsitta spixii (CR, U); Cyanoramphus cookii (CR, D); Cyanoramphus forbesi (EN, S); Cyanoramphus malherbi (CR, D); Eos histrio (EN, D); Eunymphicus uvaensis (EN, I); Hapalopsittacus fuestesi (CR, D); Loriculus flosculus (EN, D); Loriculus domicella (EN, D); Neophema chrysogaster (CR, D); Ognorhynchus icterotis (EN, I); Prioniturus verticalis (CR, D); Psephotus chrysopterygius (EN, D); Psittacula eques (EN, I); Pyrrhura

**S7 Table continued**

griseipectus (CR, D); Pyrrhura orcesi (EN, D); Pyrrhura pfrimeri (EN, D); Pyrrhura viridicata (EN, D); Rhynchopsitta pachyrhyncha (EN, D); Rhynchopsitta terrisi (EN, D); Touit melanonotus (EN, D); Vini kuhlii (EN, D); Vini ultramarina (EN, D); Eudypetes moseleyi (EN, D); Eudypetes sclateri (EN, D); Megadyptes antipodes (EN, D); Glaucidium mooreorum (CR, D); Heteroglaux blewitti (CR, D); Ketupa blakistoni (EN, D); Otus alfredi (EN, D); Otus beccarii (EN, D); Otus capnodes (CR, D); Otus insularis (EN, S); Otus ireneae (EN, D); Otus moheliensis (CR, D); Otus pauliani (CR, D); Otus siaoensis (CR, U); Otus thilohoffmanni (EN, D); Xenoglaux loweryi (EN, D); Phodilus prigoginei (EN, D); Tyto nigrobrunnea (EN, D); Apteryx mantelli (EN, D); Apalharpactes reinwardtii (EN, D)

**FISH:** Acipenser baerii (EN, D); Acipenser dabryanus (CR, D); Acipenser gueldenstaedtii (CR, D); Acipenser mikadoi (CR, D); Acipenser naccarii (CR, D); Acipenser nudiventris (CR, D); Acipenser persicus (CR, D); Acipenser schrenckii (CR, D); Acipenser sinensis (CR, D); Acipenser stellatus (CR, D); Acipenser sturio (CR, D); Huso dauricus (CR, D); Pseudoscaphirhynchus fedtschenkoi (CR, U); Pseudoscaphirhynchus hermanni (CR, D); Pseudoscaphirhynchus kaufmanni (CR, D); Scaphirhynchus albus (EN, D); Scaphirhynchus suttkusi (CR, D); Anguilla anguilla (CR, D); Craterocephalus fluviatilus (EN, ); Poblana alchichica (CR, ); Poblana letholepis (EN, ); Poblana squamata (EN, ); Teramulum waterloti (EN, D); Atherinella jilaoensis (CR, D); Chirostoma attenuatum (EN, D); Chirostoma promelas (EN, D); Colpichthys hubbsi (EN, U); Bedotia sp nov 'Manombo' (CR, D); Bedotia sp nov 'Sambava' (CR, D); Bedotia sp nov 'Vevembe' (CR, D); Bedotia tricolor (CR, U); Chilatherina sentaniensis (CR, U); Glossolepis wanamensis (CR, U); Melanotaenia boesemani (EN, U); Neostethus thessa (EN, U); Kiunga ballochi (CR, D); Pseudomugil mellis (EN, ); Scaturiginichthys vermeilipinnis (CR, ); Adrianichthys kruyti (CR, ); Oryzias orthognathus (EN, ); Xenopoeilus oophorus (EN, ); Xenopoeilus poptae (CR, ); Xenopoeilus sarasinorum (EN, ); Nomorhamphus towoetii (EN, U); Carcharhinus borneensis (EN, U); Carcharhinus hemiodon (CR, U); Glyphis garricki (CR, D); Glyphis siamensis (CR, U); Isogomphodon oxyrhynchus (CR, D); Lamiopsis temmincki (EN, D); Haploblepharus kistnasamyi (CR, U); Holohalaelurus favus (EN, D); Holohalaelurus punctatus (EN, D); Hemitriakis leucoperiptera (EN, U); Mustelus fasciatus (CR, D); Mustelus schmitti (EN, D); Alestes bouboni (EN, U); Alestopetersius nigropterus (EN, U); Brycinus bartoni (EN, U); Brycinus jacksonii (EN, D); Ladigesia roloffii (EN, U); Rhabdalestes leleupi (CR, D); Gymnocharacinus bergii (EN, ); Nannocharax altus (EN, U); Neolebias axelrodi (EN, U); Neolebias kerguennae (EN, U); Neolebias lozii (CR, U); Neolebias powelli (CR, U); Alosa killarnensis (CR, D); Alosa vistonica (CR, U); Alosa volgensis (EN, U); Clupeonella abrau (CR, D); Nannothrissa stewarti (EN, U); Barbatula eregliensis (CR, D); Barbatula samantica (EN, D); Barbatula tschaiyusensis (EN, D); Homaloptera montana (EN, U); Homaloptera santhamparaensis (EN, U); Longischistura striatus (EN, U); Mesonoemacheilus herrei (CR, D); Nemacheilus dori (CR, S); Nemacheilus jordanicus (EN, D); Nemacheilus pantheroides (EN, D); Nemacheilus petrubanarescui (EN, U); Nemacheilus pulchellus (EN, D); Nemacheilus sp nov (EN, U); Nemacheilus troglodactaractus (CR, D); Nemachilichthys shimogensis (EN, U); Oxynoemacheilus seghanensis (EN, D); Oxynoemacheilus simavica (CR, D); Schistura bairdi (EN, U); Schistura bolavenensis (EN, U); Schistura kangjupkhalensis (EN, D); Schistura leukensis (CR, U); Schistura minutus (EN, U); Schistura nagodiensis (EN, U); Schistura nasifilis (CR, D); Schistura nudidorsum (EN, U); Schistura papulifera (CR, U); Schistura pridi (EN, U); Schistura quasimodo (EN, D); Schistura reticulata (EN, U); Schistura sijuensis (EN, U); Schistura spiloptera (CR, D); Schistura tenura (CR, D); Schistura thanho (EN, D); Schistura tigrinum (EN, U); Sewellia albisuera (CR, D); Sewellia breviventralis (CR, D); Sewellia marmorata (EN, D); Sewellia patella (EN, D); Sewellia pterolineata (EN, D); Sphaerophysa dianchiensis (CR, U); Travancoria elongata (EN, U); Travancoria jonesi (EN, U); Yunnanilus discoloris (CR, D); Yunnanilus nigromaculatus (EN, D); Catostomus microps (EN, ); Chasmistes brevirostris (EN, D); Chasmistes cujus (CR, ); Chasmistes liorus (CR, D); Deltistes luxatus (EN, D); Moxostoma robustum (EN, U); Xyrauchen texanus (CR, D); Botia striata (EN, U); Cobitis arachthosensis (EN, U); Cobitis bilseli (CR, U); Cobitis calderoni (EN, D); Cobitis hellenica (EN, U); Cobitis illyrica (CR, U); Cobitis jadovaensis (CR, U); Cobitis puncticulata (CR, D); Cobitis stephanidisi (CR, U); Cobitis taurica (CR, U); Cobitis trichonica (EN, U); Cobitis turcica (EN, D); Cobitis vettonica (EN, D); Lepidocephalichthys arunachalensis (EN, U); Lepidocephalichthys jonklaasi (EN, ); Paralepidocephalus yui (EN, U); Yasuhikotakia sidhimunki (EN, D); Aaptosyax grypus (CR, D); Acanthobrama centisquama (EN, D); Acheilognathus elongatus (CR, U); Achondrostoma occidentale (EN, U); Alburnus macedonicus (CR, D); Alburnus mandrensis (CR, U); Alburnus mentoides (EN, U); Alburnus orontis (EN, D); Alburnus sarmaticus (EN, U); Alburnus schischkovi (EN, U); Alburnus vistonica (CR, U); Alburnus volvicus (EN, D); Anabarrilius alburnops (EN, D); Anabarrilius andersoni (CR, D); Anabarrilius polylepis (EN, D); Anabarrilius qiluensis (CR, D); Anabarrilius yangzonensis (CR, D); Anaecypris hispanica (EN, D); Aulopyge huegelii (EN, D); Balantiocheilus ambusticauda (CR, D); Bangana decorus (CR, D); Barbodes bovanicus (CR, U); Barbodes wynaadensis (CR, D); Barbus acuticeps (EN, D); Barbus aliciae (EN, U); Barbus andrewi (EN, D); Barbus bawkuensis (EN, U); Barbus boboi (CR, U); Barbus bourdariei (EN, U); Barbus caninus (EN, D); Barbus carcharhinoides (CR, U); Barbus claudinae (EN, U); Barbus erubescens (CR, D); Barbus euboicus (CR, S); Barbus huguenyi (EN, U); Barbus lauzannei (EN, U); Barbus liberiensis (EN, U); Barbus melanotaenia (CR, U); Barbus nigroluteus (EN, U); Barbus quadralineatus (EN, D); Barbus ruasae (CR, D); Barbus serra (EN, D); Barbus sp nov 'Banhine' (CR, U); Barbus stauchi (EN, U); Barbus subinensis (EN, D); Barbus sylvaticus (EN, U); Barbus thysi (EN, U); Barbus traorei (EN, U); Barbus treurenensis (EN, S); Barbus trevelyani (EN, U); Barilius canarensis (EN, D); Capoeta pestai (CR, D); Carasobarbus chantrei (EN, D); Catlocarpio siamensis (CR, D); Cephalakompsus pachycheilus (CR, ); Chondrostoma beysehirense (EN, U); Chondrostoma fahirae (CR, D); Chondrostoma kinzelbachi (EN, U); Chondrostoma phoxinus (EN, U); Chondrostoma soetta (EN, D); Chrosomus saylori (EN, U); Crossocheilus periyarensis (EN, D); Cyprinella alvarezdellvillari (CR, ); Cyprinella bocagrande (CR, ); Cyprinella caerulea (EN, D); Cyprinella lepida (EN, D); Cyprinella panarcys (EN, ); Cyprinella xanthicara (EN, ); Cyprinus barbatus (CR, D); Cyprinus chilia (EN, D); Cyprinus fuxianensis (CR, U); Cyprinus ilishaestomus (CR, D); Cyprinus intha (EN, D); Cyprinus micristius (CR, U); Cyprinus qionghaiensis (CR, D); Cyprinus yunnanensis (CR, U); Danio erythromicron (EN, D); Delminichthys jadovensis (CR, U); Delminichthys krbavensis (CR, U); Devario auropurpureus (EN, D); Devario horai (EN, D); Devario neilgherriensis (EN, D); Devario pathirana (EN, D); Dionda diaboli (EN, U); Epalzeorhynchus bicolor (CR, U); Erimystax cahni (EN, D); Folifer yunnanensis (EN, D); Garra ghorensis (CR, D); Garra hughi (EN, U); Garra kalakadensis (EN, D); Garra surendranathanii (EN, U); Garra trewavasae (CR, U); Gila cypha (EN, D); Gila elegans (CR, D); Gila intermedia (EN, D); Gila modesta (CR, ); Gila seminuda (EN, D); Gobio delyamurei (CR, U); Gobio skadarensis (EN, U); Gnomostomus horai (EN, U); Hampala lopezi (CR, ); Hemigrammocapoeta kemali (CR, D); Horalabiosa arunachalami (CR, D); Horalabiosa joshuai (EN, D); Hybognathus amarus (EN, U); Hypselobarbus curmuca (EN, D); Hypselobarbus dubius (EN, D); Hypselobarbus micropogon (EN, D); Hypselobarbus mussullah (EN, D); Hypselobarbus periyarensis (EN, D); Hypselobarbus pulchellus (CR, U); Hypselobarbus thomassi (CR, U); Iberochoondrostoma almakai (CR, D); Iberochoondrostoma lusitanicus (CR, D); Iberochoondrostoma olisiponensis (CR, D); Iberochoondrostoma oretanum (CR, D); Iberoocypris palaciosi (CR, U); Iotichthys phlegethontis (EN, U); Labeo alluaudi (EN, U); Labeobarbus ethiopicus (EN, D); Labeobarbus macropthalmus (EN, U); Labeobarbus mbami (EN, U); Labeobarbus mungoensis (EN, U); Labeobarbus roylui (EN, U); Labeo curriei (CR, D); Labeo fisheri (EN, U); Labeo lankae (CR, ); Labeo mesops (EN, D); Labeo potail (EN, D); Labeo seeberi (EN, D); Laubuca caeruleostigmata (EN, D); Lepidomeda albivallis (CR, ); Lepidopygopsis typus (EN, U); Luciobarbus graecus (EN, U); Lucioocypris striolatus (EN, D); Macrhybopsis tetranema (EN, D); Mandibularca resinus (CR, ); Meda fulgida (EN, D); Microrasbora rubescens (EN, D); Moapa coriacea (CR, ); Notropis albizonatus (EN, D); Notropis cahabae (EN, D); Notropis mekistocholas (EN, D); Notropis moralesi (CR, ); Notropis simus (EN, ); Onychostoma alticorpus (EN, ); Opsaridium microlepis (EN, D); Ospatulus palaemophagus (EN, ); Ospatulus truncatus (CR, ); Osteobrama bimensis (EN, U); Osteochilus longidorsalis (EN, U); Parachondrostoma arrigonis (CR, D); Parachondrostoma turienae (EN, D); Parapsilorhynchus elongatus (EN, U); Parapsilorhynchus prateri (CR, D); Pelasgus epiroticus (CR, U); Pelasgus laconicus (CR, D); Pelasgus prespensis (EN, D); Phoxinellus alepidotus (EN, U); Phoxinellus anatolicus (EN, ); Phoxinellus dalmaticus (CR, U); Phoxinus strandjae (EN, U); Phoxinus strymonicus (EN, U); Plagopterus argentissimus (CR, D); Poropuntius bolovenensis (EN, D); Poropuntius chonglingchungii (CR, D); Poropuntius consternans (EN, D); Poropuntius deauratus (EN, D); Poropuntius lobocheiloides (EN, D); Poropuntius solitus (EN, D); Probarbus jullieni (EN, D); Probarbus labeamajor (EN, D); Pseudobarbus afer (EN, D); Pseudobarbus asper (EN, D); Pseudobarbus burchelli (CR, D); Pseudobarbus burgi (EN, D); Pseudobarbus phlegethon (EN, D); Pseudobarbus quathlambae (EN, D); Pseudophoxinus anatolicus (EN, D); Pseudophoxinus battalgili (EN, D); Pseudophoxinus crassus (EN, U); Pseudophoxinus drusensis (EN, D); Pseudophoxinus egridiri (CR, D); Pseudophoxinus handlirschi (CR, U); Pseudophoxinus kervillei (EN, U); Pseudophoxinus punicus (EN, D); Pseudophoxinus syriacus (CR, D); Pseudophoxinus zeregi (CR, U); Ptychidio jordani (CR, D); Puntius amarus (CR, ); Puntius arulius (EN, D); Puntius asoka (EN, ); Puntius bandula (CR, ); Puntius baoulan (CR, ); Puntius cauveriensis (EN, U); Puntius chalakkudiensis (EN, D); Puntius clemensi (CR, ); Puntius compressiformis (CR, D); Puntius crescentus (EN, U); Puntius deccanensis (CR, U); Puntius denisonii (EN, D); Puntius disa (CR, ); Puntius exclamatio (EN, U); Puntius flavifuscus (CR, ); Puntius fraseri (EN, D); Puntius herrei (CR, D); Puntius katalo (CR, ); Puntius lanaoensis (CR, ); Puntius manalak (CR, ); Puntius manipurensis (EN, D); Puntius martensstyni (EN, ); Puntius ophicephalus (EN, U); Puntius pookodensis (CR, U); Puntius

**S7 Table continued**

sharmai (EN, U); Puntius tamaraparniei (EN, D); Rasbora wilpita (EN, ); Relictus solitarius (EN, ); Romanogobio benacensis (EN, D); Rutilius meidingeri (EN, D); Rutilius ylikiensis (EN, D); Sawbwa resplendens (EN, D); Scaphognathops theunensis (CR, D); Scardinius graecus (CR, D); Scardinius racovitzai (CR, U); Scardinius scardafa (CR, U); Schismatorhynchus nukta (EN, D); Schizothorax grahami (CR, D); Schizothorax integrilabiatus (CR, U); Schizothorax lepidothorax (EN, ); Schizothorax nepalensis (CR, D); Schizothorax raraensis (CR, U); Sinocyclocheilus grahami (CR, D); Sinocyclocheilus tingi (EN, D); Sinocyclocheilus yangzongensis (CR, D); Spratellicypris palata (CR, ); Squalius anatolicus (EN, D); Squalius castellanus (EN, D); Squalius keadicus (EN, D); Squalius lucumonis (EN, D); Squalius malacitanus (EN, D); Squalius microlepis (EN, U); Squalius moreoticus (EN, U); Squalius sp nov 'Evia' (CR, U); Squalius tenellus (EN, U); Squalius torgalensis (EN, U); Tampichthys mandibularis (CR, ); Telestes beoticus (EN, D); Telestes croaticus (EN, U); Telestes fontinalis (CR, D); Telestes polylepis (CR, U); Telestes sp nov (EN, U); Telestes turskyi (CR, U); Thynnichthys sandkhol (EN, D); Tor kulkarnii (EN, U); Tor malabaricus (EN, D); Tor putitora (EN, D); Trigonostigma somphongsi (CR, D); Varicorhinus platystoma (CR, D); Varicorhinus ruandae (CR, D); Xenocypris yunnanensis (CR, U); Ellopostoma mystax (EN, D); Psilorhynchus microphthalmus (EN, U); Psilorhynchus tenura (CR, D); Pachypanchax sakaramyi (CR, D); Pachypanchax sp nov 'Anjingo' (EN, D); Pachypanchax sp nov 'Varatraza' (EN, U); Aphanius almiriensis (CR, D); Aphanius baeticus (EN, D); Aphanius burduricus (EN, ); Aphanius iberus (EN, D); Aphanius saourensis (CR, U); Aphanius sirhani (CR, D); Aphanius splendens (CR, ); Aphanius stiassnyae (EN, U); Aphanius transgrediens (CR, ); Cualac tessellatus (EN, ); Cyprinodon beltrani (EN, ); Cyprinodon elegans (EN, U); Cyprinodon fontinalis (EN, ); Cyprinodon labiosus (CR, D); Cyprinodon macrolepis (EN, ); Cyprinodon maya (EN, ); Cyprinodon meeki (CR, ); Cyprinodon pachycephalus (CR, ); Cyprinodon radiosus (EN, S); Cyprinodon salinus (EN, U); Cyprinodon simus (EN, ); Cyprinodon verecundus (CR, ); Cyprinodon veronicae (CR, ); Fundulus julisia (EN, U); Lucania interioris (CR, ); Allotoca diazi (CR, D); Allotoca maculata (CR, ); Aetaniobius toweri (EN, ); Characodon lateralis (EN, ); Girardinichthys viviparus (CR, ); Hubbsina turneri (CR, ); llyodon whitei (CR, ); Xenophorus captivus (EN, ); Zoogoneticus tequila (CR, D); Aphyosemion alpha (EN, U); Aphyosemion amoenum (EN, U); Aphyosemion bamilekorum (EN, U); Aphyosemion bualanum (EN, U); Aphyosemion franzwernerii (EN, U); Aphyosemion fulgens (EN, U); Aphyosemion lugens (EN, U); Aphyosemion passerai (EN, U); Aphyosemion poliaki (EN, U); Aphyosemion tirbaki (EN, U); Aphyosemion volcanum (EN, U); Archiaphyosemion jeanpoli (EN, U); Epiplatys biafranus (EN, U); Epiplatys coccinatus (CR, U); Epiplatys etzeli (EN, U); Epiplatys lokoensis (EN, U); Epiplatys njalaensis (EN, U); Epiplatys roloffii (EN, D); Epiplatys ruhkopfi (CR, U); Fundulopanchax amietii (EN, U); Fundulopanchax arnoldi (EN, U); Fundulopanchax cinnamomeus (EN, U); Fundulopanchax fallax (EN, U); Fundulopanchax marmoratus (EN, U); Fundulopanchax oeseri (EN, U); Fundulopanchax powelli (CR, U); Fundulopanchax rubrolabialis (EN, U); Fundulopanchax scheeli (EN, U); Nothobranchius polli (EN, U); Nothobranchius rosenstocki (EN, U); Nothobranchius symoensi (EN, U); Scriptaphyosemion bertholdi (EN, U); Scriptaphyosemion brueningi (EN, U); Scriptaphyosemion cauveti (CR, U); Scriptaphyosemion etzeli (CR, U); Aplocheilichthys sp nov 'Baringo' (CR, D); Gambusia dominicensis (EN, D); Gambusia eurystoma (CR, ); Gambusia nobilis (EN, U); Pantanodon sp nov 'Manombo' (CR, D); Plataplochilus chalcopyrus (EN, U); Plataplochilus terveri (EN, U); Poecilia latipunctata (CR, ); Poecilia sulphuraria (CR, ); Poropanchax myersi (EN, U); Xiphophorus couchianus (CR, ); Xiphophorus gordonii (EN, ); Xiphophorus meyeri (EN, ); Profundulus hildebrandi (EN, D); Austrolebias cinereus (CR, U); Valencia hispanica (CR, D); Valencia letourneuxi (CR, D); Physiculus helenensis (CR, ); Pungitius hellenicus (CR, D); Tomocodon abuelorum (EN, D); Kneria sp nov 'South Africa' (CR, D); Brachionichthys hirsutus (CR, ); Liza luciae (EN, ); Eptatretus octatrema (CR, U); Myxine paucidens (EN, U); Paramyxine taiwanae (EN, U); Galaxias fontanus (CR, ); Galaxias fuscus (CR, ); Galaxias johnstoni (CR, ); Galaxias pedderensis (CR, ); Hypomesus transpacificus (EN, ); Marcusenius meronai (EN, U); Marcusenius victoricae (EN, D); Mormyrus subundulatus (EN, D); Stomatorhinus ivindoensis (EN, U); Sclerophages formosus (EN, D); Sandelia bainesii (EN, D); Pterapogon kauderni (EN, D); Badis tuivaiei (EN, U); Salaria economidisi (CR, U); Callionymus sanctaehelenae (CR, ); Archoplites interruptus (EN, D); Alcolapia alcalicus (EN, U); Amphilophus margaritifer (EN, D); Amphilophus zaliosus (CR, D); Astatotilapia sp nov 'dwarf bigeye scraper' (CR, ); Astatotilapia sp nov 'shovelmouth' (EN, ); Benitochromis conjunctus (EN, U); Benitochromis finleyi (EN, U); Benitochromis nigrodorsalis (EN, U); Benitochromis riomuniensis (EN, U); Benitochromis ufermanni (EN, U); Chetia brevis (EN, U); Chetia mola (EN, U); Chromidotilapia linkei (EN, U); Danakilia franchettii (EN, U); Etroplus canarensis (EN, S); Gobiocichla ethelwynnae (EN, U); Haplochromis aelocephalus (CR, D); Haplochromis annectidens (CR, ); Haplochromis antleteri (CR, D); Haplochromis apogonoides (CR, D); Haplochromis argenteus (CR, D); Haplochromis barbaraee (CR, D); Haplochromis bareli (CR, D); Haplochromis beadleii (CR, ); Haplochromis brownae (CR, D); Haplochromis cassius (CR, D); Haplochromis cinctus (CR, D); Haplochromis cnester (CR, D); Haplochromis coprologus (CR, D); Haplochromis crassilabris (CR, D); Haplochromis crocopeplus (CR, D); Haplochromis cyaneus (EN, D); Haplochromis dentex (CR, D); Haplochromis desfontainii (EN, U); Haplochromis dichrourus (CR, D); Haplochromis erythromaculatus (EN, D); Haplochromis flavijosephi (EN, D); Haplochromis flavipinnis (CR, D); Haplochromis granti (CR, D); Haplochromis guarti (CR, D); Haplochromis heusinkveldi (CR, D); Haplochromis hiatus (CR, D); Haplochromis iris (CR, D); Haplochromis ishmaeli (CR, D); Haplochromis katunzii (CR, D); Haplochromis latifasciatus (CR, ); Haplochromis longirostris (CR, D); Haplochromis macrognathus (CR, D); Haplochromis martini (CR, D); Haplochromis michaeli (CR, D); Haplochromis microdon (CR, D); Haplochromis mylergates (CR, D); Haplochromis nanoserranus (CR, D); Haplochromis obesus (CR, D); Haplochromis pancitrinus (CR, D); Haplochromis parvidens (CR, D); Haplochromis percoides (CR, D); Haplochromis perrieri (CR, D); Haplochromis plutonius (CR, D); Haplochromis ptistes (CR, D); Haplochromis pyrropteryx (CR, D); Haplochromis simpsoni (EN, ); Haplochromis sphex (CR, D); Haplochromis sp nov 'Amboseli' (CR, U); Haplochromis sp nov 'micro-obesus' (CR, D); Haplochromis sp nov 'ruby' (CR, ); Haplochromis sulphureus (CR, D); Haplochromis teegelaari (CR, D); Haplochromis teunisrasii (CR, D); Haplochromis theliodon (CR, D); Haplochromis ushindi (CR, D); Haplochromis venator (EN, ); Haplochromis victorianus (CR, D); Haplochromis vonlinnei (CR, D); Haplochromis xenostoma (CR, D); Hemichromis cerasogaster (EN, U); Herichthys labridens (EN, ); Konia dikume (CR, U); Konia eisentrauti (CR, U); Lamprologus kungweensis (CR, U); Lamprologus tumbanus (EN, U); Lethrinops macracanthus (EN, D); Lethrinops micrentodon (EN, U); Lethrinops microdon (EN, U); Lethrinops stridae (EN, U); Limbochromis robertsi (EN, D); Lipochromis sp nov 'backflash cryptodon' (CR, ); Lipochromis sp nov 'black cryptodon' (CR, ); Lipochromis sp nov 'parvidens-like' (CR, ); Lipochromis sp nov 'small obesoid' (CR, ); Myaka myaka (CR, U); Nanochromis transvestitus (EN, U); Oreochromis alcalicus (EN, D); Oreochromis amphimelas (EN, D); Oreochromis chunguruensis (CR, D); Oreochromis esculentus (CR, D); Oreochromis hunteri (CR, D); Oreochromis jipe (CR, D); Oreochromis karoma (CR, D); Oreochromis karongae (EN, D); Oreochromis lepidurus (EN, U); Oreochromis lidole (EN, D); Oreochromis mortimeri (CR, D); Oreochromis pangani (CR, D); Oreochromis squamipinnis (EN, D); Oreochromis variabilis (CR, D); Orthochromis kasuluensis (EN, U); Orthochromis luongoensis (EN, U); Orthochromis mazimeroensis (EN, U); Orthochromis mosoensis (EN, U); Orthochromis rubrolabialis (EN, U); Orthochromis uvinzae (CR, U); Oxylapia polli (CR, U); Parananochromis axelrodi (EN, U); Parananochromis ornatus (EN, U); Paratilapia sp nov 'Veveembe' (CR, D); Paretroplus dambabe (EN, D); Paretroplus maculatus (CR, D); Paretroplus maromandia (EN, D); Paretroplus menarambo (CR, U); Paretroplus sp nov 'Sofia' (EN, D); Prognathochromis sp nov 'long snout' (EN, ); Ptychochromis inornatus (EN, D); Ptychochromis sp nov 'Green Garaka' (EN, D); Ptychochromis sp nov 'Joba mena' (CR, D); Ptychochromoides betsileanus (CR, U); Ptychochromoides vondrozo (CR, D); Ptychochromis sp nov 'rainbow sheller' (CR, ); Ptychochromis sp nov 'Rusinga oral sheller' (CR, ); Pundamilia igneopinnis (EN, U); Pungu maclareni (CR, D); Sarotherodon caroli (CR, U); Sarotherodon lohbergeri (CR, U); Sarotherodon steinbachi (CR, U); Serranochromis meridianus (EN, U); Stomatepia mariae (CR, U); Stomatepia pindu (CR, U); Teleogramma brichardi (CR, U); Tilapia bakossiorum (CR, U); Tilapia beminii (CR, U); Tilapia bythobates (CR, U); Tilapia cessionia (CR, U); Tilapia coffea (CR, U); Tilapia deckerti (CR, U); Tilapia flava (CR, U); Tilapia guinasana (CR, U); Tilapia gutturosa (CR, U); Tilapia imbriferina (CR, U); Tilapia kottae (EN, U); Tilapia snyderae (CR, U); Tilapia spongotropis (CR, U); Tilapia thysi (CR, U); Tristramella sacra (CR, U); Tylochromis microdon (EN, U); Xystichromis sp nov 'Kyoga flameback' (CR, ); Clinus spatulatus (EN, ); Datnioides pulcher (CR, D); Kribia leonensis (EN, U); Mogurnda furva (CR, D); Mogurnda variegata (CR, D); Typhleotris madagascariensis (EN, U); Typhleotris pauliani (EN, U); Epinephelus akaara (EN, D); Epinephelus drummondhayi (CR, U); Epinephelus striatus (EN, D); Hyporthodus nigrilus (CR, U); Akihito futuna (CR, U); Chlamydogobius micropterus (CR, ); Chlamydogobius squamigenus (CR, ); Economidichthys trichonis (EN, D); Gobiosoma homochroma (EN, D); Gobulus birdsongii (CR, D); Knipowitschia cameliae (CR, U); Knipowitschia ephesi (CR, U); Knipowitschia mermere (CR, D); Knipowitschia milleri (CR, D); Knipowitschia mrakovcici (CR, D); Knipowitschia thessala (EN, U); Pandaka pygmaea (CR, ); Pomatoschistus tortonesei (EN, U); Proterorhinus tataricus (CR, U); Rhinogobius lineatus (EN, D); Sicyopterus eudentatus (EN, D); Sicyopterus rapa (EN, U); Sicyopterus sarasini (EN, D); Silhouettea sibayi (EN, U); Smiliscyopus sasali (EN, D); Stiphodon discotorquatus (CR, D); Stiphodon julieni (EN, U); Stiphodon rubromaculatus (CR, U); Weberogobius amadi (CR, ); Anisotremus moricandi (EN, ); Halichoeres socialis (CR, U); Scarus trispinosus (EN, D); Paraclinus magdalenae (EN, S); Paraclinus walkeri (CR, U); Lates angustifrons (EN, D); Lates macrophthalmus (EN, D); Lates microlepis (EN, D); Terateleotris aspro (EN, U); Betta livida (EN, ); Betta miniopinna (CR, ); Betta persephone (CR, ); Betta

**S7 Table continued**

simplex (CR, U); *Betta spilotogena* (CR, ); *Parosphromenus harveyi* (EN, ); *Maccullochella ikei* (EN, ); *Maccullochella macquariensis* (EN, ); *Nannoperca oxleyana* (EN, ); *Crystallaria cincotta* (CR, D); *Etheostoma akatulo* (EN, D); *Etheostoma boschungii* (EN, D); *Etheostoma chermocki* (CR, D); *Etheostoma chienense* (EN, U); *Etheostoma ditrema* (EN, D); *Etheostoma fonticola* (EN, U); *Etheostoma moorei* (EN, D); *Etheostoma nuchale* (EN, U); *Etheostoma okaloosae* (EN, ); *Etheostoma phytophilum* (EN, D); *Etheostoma rubrum* (EN, U); *Etheostoma scotti* (EN, D); *Etheostoma susanae* (EN, D); *Etheostoma tecumsehii* (EN, D); *Gymnocephalus ambriaelchus* (CR, D); *Percina antesella* (EN, U); *Percina aurora* (EN, U); *Percina brevicauda* (EN, U); *Percina jenkinsi* (CR, D); *Percina kusha* (EN, U); *Romanichthys valsanicola* (CR, U); *Stereolepis gigas* (CR, U); *Chaetodontopleus vanderloosi* (EN, D); *Azurina eupalama* (CR, U); *Neopomacentrus aquadulcis* (EN, D); *Protogobius attiti* (EN, U); *Argyrosomus hololepidotus* (EN, U); *Bahaba taipingensis* (CR, D); *Sciaena callaensis* (CR, U); *Thunnus maccoyii* (CR, D); *Thunnus thynnus* (EN, D); *Paralabrax albomaculatus* (EN, D); *Enneapterygius namarrgon* (EN, U); *Speoplatyrhinus poulsoni* (CR, S); *Eudontomyzon hellenicus* (CR, U); *Lampetra spadicea* (CR, D); *Hippoglossus hippoglossus* (EN, ); *Atlantoraja castelnaui* (EN, D); *Bathyraja griseocauda* (EN, D); *Dasyatis laosensis* (EN, D); *Dasyatis margarita* (EN, D); *Himantura kittipongi* (EN, U); *Himantura oxyrhyncha* (EN, U); *Himantura polylepis* (EN, D); *Himantura signifer* (EN, U); *Pastinachus solocirostris* (EN, U); *Urogymnus ukpam* (EN, U); *Aetobatus flagellum* (EN, D); *Aetomylaeus maculatus* (EN, D); *Aetomylaeus vespertilio* (EN, D); *Myliobatis hamlyni* (EN, D); *Narcine bancroftii* (CR, U); *Electrolux addisoni* (CR, U); *Anoxypristis cuspidata* (EN, D); *Pristis clavata* (EN, D); *Pristis pristis* (CR, D); *Pristis zijson* (CR, D); *Dipturus laevis* (EN, S); *Leucoraja melitensis* (CR, D); *Leucoraja ocellata* (EN, D); *Malacoraja senta* (EN, D); *Okamejei pita* (CR, U); *Raja undulata* (EN, D); *Rostroraja alba* (EN, D); *Zearaja maugeana* (EN, U); *Glaucostegus cemiculus* (EN, D); *Rhinobatos horkelii* (CR, D); *Trygonorrhina melaleuca* (EN, U); *Rhinoptera brasiliensis* (EN, D); *Urolophus javanicus* (CR, D); *Urolophus orarius* (EN, U); *Coregonus bavaricus* (CR, U); *Coregonus hoferi* (CR, U); *Coregonus pennantii* (CR, U); *Coregonus pollan* (EN, U); *Coregonus reighardi* (CR, ); *Coregonus stigmaticus* (EN, U); *Coregonus trybomi* (CR, D); *Coregonus vandesius* (EN, U); *Hucho bleekeri* (CR, D); *Hucho hucho* (EN, U); *Oncorhynchus apache* (CR, ); *Oncorhynchus formosanus* (CR, ); *Oncorhynchus gilae* (EN, ); *Oncorhynchus ishikawai* (EN, ); *Salmo carpio* (CR, D); *Salmo ezenami* (CR, U); *Salmo obtusirostris* (EN, D); *Salmo peristericus* (EN, S); *Salmo platycephalus* (CR, U); *Salvelinus grayi* (CR, D); *Salvelinus japonicus* (EN, ); *Salvelinus lonsdalii* (CR, U); *Salvelinus obtusus* (CR, U); *Salvelinus tolmachoffi* (EN, ); *Salvelinus willoughbii* (EN, U); *Cottus paulus* (CR, S); *Cottus rondeleti* (CR, U); *Sebastolobus alascanus* (EN, ); *Sebastes fasciatus* (EN, ); *Sebastes paucispinus* (CR, ); *Amblyceps arunchalensis* (EN, U); *Liobagrus kingi* (EN, U); *Liobagrus nigricauda* (EN, U); *Amphilius caudesignatus* (EN, U); *Amphilius korupi* (EN, U); *Amphilius lamani* (EN, U); *Paramphilius firestonei* (EN, U); *Arius festinus* (EN, D); *Arius uncinatus* (EN, D); *Astroblepus ubidiai* (CR, U); *Austroglanis barnardi* (EN, D); *Batasio sharavatiensis* (EN, U); *Hemibagrus punctatus* (CR, D); *Horabagrus nigricollaris* (EN, U); *Pseudobagrus medianalis* (CR, D); *Lepthoplosternum tordilho* (EN, D); *Clariallabes mutsindoziensis* (EN, U); *Clarias cavernicola* (CR, U); *Clarias maclareni* (CR, U); *Clarias magur* (EN, D); *Encheloclarias curtisoma* (CR, ); *Encheloclarias kelioides* (CR, ); *Xenoclarias eupogon* (CR, U); *Chrysichthys teugelsi* (EN, U); *Chrysichthys walkeri* (EN, D); *Liauchenoglanis maculatus* (EN, U); *Notoglanidium thomasi* (EN, U); *Parauchenoglanis akiri* (EN, U); *Parauchenoglanis longiceps* (EN, U); *Ictalurus pricei* (EN, D); *Noturus crypticus* (CR, U); *Noturus fasciatus* (EN, U); *Noturus gilberti* (EN, U); *Noturus lachneri* (EN, U); *Noturus stanauli* (EN, U); *Noturus taylori* (EN, D); *Prietella phreatophila* (EN, ); *Malapterurus murrayi* (EN, U); *Chiloglanis asymetricaudalis* (EN, U); *Chiloglanis bifurcus* (EN, U); *Chiloglanis polyodon* (CR, U); *Chiloglanis ruziensiensis* (CR, U); *Synodontis dekimpei* (CR, U); *Synodontis dorsomaculatus* (EN, U); *Synodontis guttatus* (EN, U); *Synodontis pardalis* (EN, U); *Pangasianodon hypophthalmus* (EN, D); *Pangasius sanitwongsei* (CR, D); *Irvineia voltae* (EN, D); *Pseudeutropius mitchelli* (EN, U); *Silonia childreni* (EN, D); *Ceratoglanis pachynema* (CR, D); *Pterocryptis barakensis* (EN, U); *Pterocryptis inusitata* (EN, D); *Pterocryptis wynaadensis* (CR, U); *Silurus mento* (CR, U); *Glyptothorax anamalaiensis* (EN, U); *Glyptothorax davisinghi* (EN, U); *Glyptothorax housei* (EN, U); *Glyptothorax kashmirensis* (CR, U); *Glyptothorax kudremukhensis* (CR, U); *Glyptothorax madraspatanus* (EN, D); *Glyptothorax poonaensis* (EN, U); *Oreoglanis heteropogon* (EN, D); *Oreoglanis lepturus* (CR, U); *Oreoglanis siamensis* (EN, D); *Trichomycterus venulosus* (CR, U); *Centrophorus harrissoni* (EN, D); *Squatina formosa* (EN, U); *Squatina guggenheim* (EN, D); *Squatina punctata* (EN, D); *Pillaia indica* (EN, U); *Mastacembelus oatesii* (EN, U); *Monopterus fossorius* (EN, U); *Ophisternon infernale* (EN, ); *Hippocampus capensis* (EN, U); *Syngnathus watermeyeri* (CR, D)

**MAMMALIA:** *Amblysomus marleyi* (EN, U); *Chrysospalax trevelyani* (EN, U); *Cryptochloris wintoni* (CR, U);

**S7 Table continued**

*Cryptochloris zyli* (EN, U); *Neamblysomus gunningi* (EN, U); *Microgale jenkinsae* (EN, D); *Microgale jobihelyi* (EN, U); *Micropotamogale lamottei* (EN, D); *Galidictis grandidieri* (EN, D); *Prionailurus planiceps* (EN, D); *Lontra provocax* (EN, D); *Lutra sumatrana* (EN, D); *Mustela lutreola* (CR, D); *Arctocepalus galapagoensis* (EN, D); *Neophoca cinerea* (EN, D); *Zalophus wollebaeki* (EN, D); *Pusa caspica* (EN, D); *Procyon pygmaeus* (CR, D); *Cynogale bennettii* (EN, U); *Viverra civettina* (CR, U); *Eubalaena japonica* (EN, U); *Arabitragus jakyari* (EN, D); *Bubalus mindorensis* (CR, D); *Bubalus quarlesi* (EN, D); *Capra caucasica* (EN, D); *Cephalophus adersi* (CR, D); *Cephalophus jentinki* (EN, D); *Cephalophus spadix* (EN, D); *Gazella cuvieri* (EN, U); *Gazella leptoceros* (EN, D); *Gazella spekei* (EN, D); *Kobus megaceros* (EN, D); *Procopra przewalskii* (EN, D); *Pseudois schaeferi* (EN, D); *Tragelaphus buxtoni* (EN, D); *Axis calamianensis* (EN, D); *Axis kuhlii* (CR, S); *Dama mesopotamica* (EN, I); *Muntiacus vuquangensis* (EN, D); *Rucervus eldii* (EN, D); *Rusa alfredi* (EN, D); *Cephalorhynchus hectori* (EN, D); *Moschus anhuiensis* (EN, D); *Moschus berezovskii* (EN, D); *Moschus chrysogaster* (EN, D); *Moschus cupreus* (EN, D); *Moschus fuscus* (EN, D); *Moschus leucogaster* (EN, D); *Sus cebifrons* (CR, D); *Sus oliveri* (EN, D); *Sus verrucosus* (EN, D); *Catagopus wagneri* (EN, D); *Tragulus nigricans* (EN, D); *Balantiopteryx infusca* (EN, D); *Coleura seychellensis* (CR, D); *Emballonura semicaudata* (EN, D); *Amorphochilus schnablii* (EN, D); *Hipposideros durgadasi* (EN, D); *Hipposideros halophyllus* (EN, D); *Hipposideros hypophyllus* (EN, D); *Hipposideros lamottei* (CR, D); *Hipposideros orbiculus* (EN, D); *Eumops floridanus* (CR, D); *Tadarida bregullae* (EN, D); *Tadarida tomensis* (EN, D); *Pteronotus paraguayensis* (CR, D); *Mystacina robusta* (CR, U); *Natalus jamaicensis* (CR, D); *Natalus primus* (CR, D); *Artibeus incomitatus* (CR, D); *Leptonycteris nivalis* (EN, D); *Lonchorhina fernandesi* (EN, D); *Lonchorhina marinkellei* (EN, D); *Platyrrhinus chochoensis* (EN, D); *Sturnira nana* (EN, U); *Acerodon humilis* (EN, D); *Aproteles bulmerae* (CR, D); *Dobsonia chapmani* (CR, D); *Latidens salimalii* (EN, D); *Mirimiri acrodonta* (CR, D); *Myonycteris brachycephala* (EN, D); *Neopteryx frosti* (EN, D); *Nyctimene rabori* (EN, D); *Pteralopex anceps* (EN, D); *Pteralopex atrata* (EN, D); *Pteralopex flanneryi* (CR, D); *Pteralopex pulchra* (CR, D); *Pteralopex taki* (EN, D); *Pteropus aruensis* (CR, U); *Pteropus cognatus* (EN, D); *Pteropus fundatus* (EN, D); *Pteropus insularis* (CR, U); *Pteropus livingstonii* (EN, D); *Pteropus mariannus* (EN, D); *Pteropus melanopogon* (EN, D); *Pteropus nitendiensis* (EN, D); *Pteropus pohlei* (EN, D); *Pteropus pselaphon* (CR, D); *Pteropus rodricensis* (CR, I); *Pteropus tuberculatus* (CR, U); *Rhinolophus cognatus* (EN, D); *Rhinolophus hilli* (CR, D); *Rhinolophus maclaudi* (EN, D); *Rhinolophus madurensis* (EN, D); *Rhinolophus ziama* (EN, D); *Chalinolobus neocaledonicus* (EN, D); *Eptesicus japonensis* (EN, D); *Eptesicus malagasyensis* (EN, U); *Kerivoula africana* (EN, D); *Miniopterus fuscus* (EN, D); *Miniopterus robustior* (EN, U); *Murina ryukyuna* (EN, D); *Murina tenebrosa* (CR, U); *Myotis findleyi* (EN, D); *Myotis hajastanicus* (CR, U); *Myotis peninsularis* (EN, D); *Myotis planiceps* (EN, D); *Myotis pruinus* (EN, D); *Myotis yanbarensis* (CR, D); *Nyctalus azureum* (EN, D); *Nyctophilus howensis* (CR, U); *Nyctophilus nebulosus* (CR, D); *Pharotis imogene* (CR, U); *Pipistrellus endoi* (EN, D); *Pipistrellus maderensis* (EN, D); *Pipistrellus murrayi* (CR, D); *Plecotus teneriffae* (EN, D); *Rhogeessa genowaysi* (EN, D); *Pseudantechinus mimulus* (EN, D); *Sminthopsis aitkeni* (CR, D); *Sminthopsis psammophila* (EN, D); *Marmosops handleyi* (CR, D); *Monodelphis unistriata* (CR, U); *Dendrolagus goodfellowi* (EN, D); *Dendrolagus matschiei* (EN, D); *Dendrolagus mayri* (CR, U); *Dendrolagus mbaiso* (EN, D); *Dendrolagus notatus* (EN, D); *Dendrolagus pulcherrimus* (CR, D); *Dendrolagus scottae* (CR, D); *Dorcopsis atrata* (CR, D); *Lagostrophus fasciatus* (EN, U); *Petrogale persephone* (EN, D); *Thylogale calabyi* (EN, D); *Thylogale lanatus* (EN, D); *Dactylopsila tatei* (EN, U); *Gymnobelideus leadbeateri* (EN, D); *Petaurus abidi* (CR, D); *Petaurus gracilis* (EN, D); *Ailurops melanotis* (CR, D); *Phalanger alexandrae* (EN, D); *Phalanger lullulae* (EN, S); *Phalanger matanini* (CR, U); *Spilococcus rufoniger* (CR, D); *Spilococcus wilsoni* (CR, D); *Bettongia tropica* (EN, D); *Potorous gilbertii* (CR, S); *Potorous longipes* (EN, U); *Lasiiorhinus krefftii* (CR, S); *Neohylomys hainanensis* (EN, D); *Podogymnura aureospinula* (EN, D); *Solenodon cubanus* (EN, D); *Solenodon paradoxus* (EN, D); *Chimarrigale phaeura* (EN, D); *Congosorex phillipsorum* (CR, D); *Congosorex andamanensis* (CR, D); *Crociodura ansellorum* (EN, D); *Crociodura baileyi* (EN, D); *Crociodura bottegoides* (EN, D); *Crociodura canariensis* (EN, D); *Crociodura desperata* (EN, D); *Crociodura harena* (CR, D); *Crociodura hikmiya* (EN, D); *Crociodura jenkinsi* (CR, D); *Crociodura lanosa* (EN, D); *Crociodura miya* (EN, D); *Crociodura negrina* (EN, D); *Crociodura nicobarica* (CR, D); *Crociodura orii* (EN, D); *Crociodura phaeura* (EN, U); *Crociodura picea* (EN, D); *Crociodura stenocephala* (EN, D); *Crociodura tansaniana* (EN, D); *Crociodura tarella* (EN, D); *Crociodura telfordi* (EN, D); *Crociodura thomensis* (EN, D); *Crociodura trichura* (CR, U); *Crociodura usambarae* (EN, D); *Crociodura wimmeri* (CR, U); *Cryptotis andersi* (EN, U); *Cryptotis mera* (EN, D); *Cryptotis nelsoni* (CR, U); *Feroculus feroculus* (EN, D); *Myosorex blarina* (EN, D); *Myosorex eisentrauti* (CR, D); *Myosorex geata* (EN, D); *Myosorex kihalaei* (EN, D); *Myosorex okuensis* (EN, D); *Myosorex rumpii* (EN, D); *Solisorex*



**S7 Table continued**

pearsoni (EN, D); Sorex pribilofensis (EN, U); Sorex sclateri (CR, D); Sorex stizodon (CR, D); Suncus aequatorius (CR, D); Suncus dayi (EN, D); Suncus fellowesgordoni (EN, D); Suncus mertensi (EN, D); Suncus zeylanicus (EN, D); Sylvisorex howelli (EN, D); Sylvisorex isabellae (EN, D); Sylvisorex morio (EN, D); Mogera etigo (EN, D); Bunolagus monticularis (CR, D); Caprolagus hispidus (EN, D); Lepus flavigularis (EN, D); Pentalagus furnessi (EN, D); Sylvilagus graysoni (EN, D); Sylvilagus insonus (EN, U); Sylvilagus mansuetus (CR, D); Sylvilagus robustus (EN, U); Ochotona argentata (CR, D); Ochotona hoffmanni (EN, U); Ochotona iliensis (EN, D); Ochotona koslowi (EN, D); Rhynchocyon chrysopygus (EN, D); Zaglossus attenboroughi (CR, D); Zaglossus bartoni (CR, D); Zaglossus brunii (CR, D); Echymipera davidi (EN, U); Peroryctes broadbenti (EN, D); Rhynchomeles prattorum (EN, U); Equus ferus (EN, I); Equus grevyi (EN, S); Manis javanica (EN, D); Manis pentadactyla (EN, D); Bradypus pygmaeus (CR, D); Alouatta pigra (EN, D); Alouatta ululata (EN, D); Ateles fusciceps (CR, D); Lagotrix cana (EN, D); Lagotrix lugens (CR, D); Oreonax flavicauda (CR, D); Callitrix flaviceps (EN, D); Leontopithecus caissara (CR, D); Leontopithecus chrysomelas (EN, D); Leontopithecus chrysopygus (EN, D); Saguinus bicolor (EN, D); Saguinus leucopus (EN, D); Saguinus oedipus (CR, D); Cebus flavius (CR, D); Cebus kaapori (CR, D); Cebus robustus (EN, D); Cebus xanthosternus (CR, D); Cercocebus galeritus (EN, D); Cercocebus sanjei (EN, D); Cercopithecus dryas (CR, U); Cercopithecus preussi (EN, D); Macaca maura (EN, D); Macaca munzala (EN, D); Macaca nigra (CR, D); Macaca pagensis (CR, D); Macaca sinica (EN, D); Presbytis chrysomelas (CR, D); Presbytis comata (EN, D); Presbytis melalophos (EN, D); Presbytis potenzi (EN, D); Procolobus gordonorum (EN, D); Procolobus kirkii (EN, D); Procolobus pennantii (CR, D); Procolobus preussi (CR, D); Pygathrix cinerea (CR, D); Pygathrix nemea (EN, D); Pygathrix nigripes (EN, D); Rhinopithecus avunculus (CR, D); Rhinopithecus bieti (EN, D); Rhinopithecus brelichi (EN, D); Rhinopithecus roxellana (EN, D); Rungwecebus kipunji (CR, D); Semnopithecus ajax (EN, D); Simias concolor (CR, D); Trachypithecus delacouri (CR, D); Trachypithecus francoisi (EN, D); Trachypithecus geei (EN, D); Trachypithecus germaini (EN, D); Trachypithecus hatinhensis (EN, D); Trachypithecus phayrei (EN, D); Trachypithecus poliocephalus (CR, D); Trachypithecus shortridgei (EN, D); Trachypithecus vetulus (EN, D); Microcebus berthae (EN, D); Microcebus ravelobensis (EN, D); Microcebus sambiranensis (EN, D); Microcebus tavaratra (EN, D); Galagoides rondoensis (CR, D); Hylobates agilis (EN, D); Hylobates albobarbis (EN, D); Hylobates klossii (EN, D); Hylobates muelleri (EN, D); Hylobates pileatus (EN, D); Nomascus concolor (CR, D); Nomascus gabriellae (EN, D); Nomascus hainanus (CR, S); Nomascus leucogenys (CR, D); Nomascus nasutus (CR, D); Nomascus siki (EN, D); Avahi cleesei (EN, D); Avahi occidentalis (EN, D); Propithecus candidus (CR, D); Propithecus coquereli (EN, D); Propithecus coronatus (EN, D); Propithecus diadema (EN, D); Propithecus edwardsi (EN, D); Propithecus perrieri (CR, D); Propithecus tattersalli (EN, U); Eulemur cinereiceps (EN, D); Eulemur flavifrons (CR, D); Eulemur sanfordi (EN, D); Hapalemur alaotrensis (CR, D); Prolemur simus (CR, D); Varecia rubra (EN, D); Lepilemur ankaranensis (EN, D); Lepilemur septentrionalis (CR, D); Nycticebus javanicus (CR, D); Callicebus barbarabrownae (CR, D); Callicebus caquetensis (CR, D); Callicebus coimbrai (EN, D); Callicebus oenanthe (CR, D); Callicebus olallae (EN, D); Chiropotes albinasus (EN, D); Chiropotes satanas (CR, D); Chiropotes utahickae (EN, D); Tarsius pelengensis (EN, D); Tarsius sangirensis (EN, D); Tarsius tumpara (CR, D); Abrocoma boliviensis (CR, D); Mesocapromys angelcabrerai (EN, U); Mesocapromys auritus (EN, S); Mesocapromys nanus (CR, U); Mesocapromys sanfelipensis (CR, U); Mysateles garridoi (CR, U); Mysateles gundlachi (EN, D); Mysateles meridionalis (CR, D); Plagiodontia aedium (EN, D); Cavia intermedia (CR, D); Chinchilla chinchilla (CR, D); Euryoryzomys lamia (EN, D); Habromys chinanteco (CR, D); Habromys delicatulus (CR, D); Habromys ixtlani (CR, D); Habromys lepturus (CR, D); Habromys schmidlyi (CR, D); Habromys simulatus (EN, D); Kunsia fronto (EN, D); Megadontomys cryophilus (EN, D); Megadontomys nelsoni (EN, D); Megadontomys thomasi (EN, D); Melanomys zunigae (CR, U); Microakodontomys transitorius (EN, D); Microtus bavaricus (CR, D); Microtus oaxacensis (EN, D); Microtus umbrinus (EN, D); Mindomys hammondi (EN, D); Nelsonia goldmani (EN, D); Neotoma angustapalata (EN, D); Neotoma bryantii (EN, D); Neotoma nelsoni (CR, D); Neusticomys mussoi (EN, D); Oryzomys gorgasi (EN, D); Oxymycterus hucucha (EN, D); Oxymycterus josei (EN, D); Peromyscus bullatus (CR, D); Peromyscus caniceps (CR, D); Peromyscus dickeyi (CR, D); Peromyscus guardia (CR, D); Peromyscus interparietalis (CR, D); Peromyscus madrensis (EN, D); Peromyscus mayensis (CR, D); Peromyscus mekisturus (CR, U); Peromyscus melanocarpus (EN, U); Peromyscus melanurus (EN, U); Peromyscus ochraventer (EN, D); Peromyscus pseudocritinus (CR, D); Peromyscus sejugis (EN, D); Peromyscus slevini (CR, D); Peromyscus stephani (CR, D); Peromyscus winkelmanni (EN, D); Phyllotis definitus (EN, D); Reithrodontomys bakeri (EN, D); Reithrodontomys raviventris (EN, D); Reithrodontomys spectabilis (CR, D); Rheomys mexicanus (EN, U); Sigmodon planifrons (EN, D); Thomasomys hylophilus (EN, D); Thomasomys monochromos (EN, D); Tylomys bullaris (CR, D); Tylomys tumbalensis (CR, D); Wilfredomys oenax (EN, D); Xenomys nelsoni (EN, D); Ctenomys australis (EN, D); Ctenomys bonettoi (EN, D); Ctenomys flamarioni (EN, D); Ctenomys occultus (EN, D); Ctenomys osvoldoreigi (CR, D); Ctenomys pilarensis (EN, D); Ctenomys rionegrensis (EN, D); Ctenomys roigi (CR, D); Ctenomys sociabilis (CR, D); Dasyprocta mexicana (CR, D); Dasyprocta ruatanica (EN, D); Laonastes aenigmamus (EN, D); Sicista armenica (EN, D); Sicista kazbegica (EN, U); Callistomys pictus (EN, D); Phyllomys brasiliensis (EN, D); Phyllomys lundii (EN, D); Phyllomys mantiqueirensis (CR, D); Phyllomys thomasi (EN, D); Phyllomys unicolor (CR, D); Santamartamys rufodorsalis (CR, U); Trinomys eliasi (EN, D); Trinomys moojeni (EN, D); Trinomys yonenagae (EN, D); Geomys tropicalis (CR, D); Orthogeomys lanianus (CR, D); Pappogeomys alcorni (CR, D); Zygogeomys trichopus (EN, D); Dipodomys gravipes (CR, U); Dipodomys ingens (EN, D); Dipodomys insularis (CR, D); Dipodomys margaritae (CR, U); Dipodomys stephensi (EN, D); Heteromys nelsoni (EN, D); Heteromys oasicus (EN, D); Liomys spectabilis (EN, D); Perognathus alticola (EN, D); Apodemus gurkha (EN, D); Batomys russatus (EN, D); Bunomys coelestis (CR, D); Bunomys prolatus (EN, D); Chiropodomys karlkooptmani (EN, D); Crateromys australis (CR, U); Crateromys heaneyi (EN, D); Crateromys schadenbergi (EN, D); Cremnomys elvira (CR, D); Dasyomys montanus (EN, D); Desmnomys yaldeni (EN, U); Diplothrix legata (EN, D); Echiothrix leucura (EN, D); Gerbillus hesperinus (EN, D); Grammomyz gigas (EN, D); Hadromys humei (EN, D); Hapalomys longicaudatus (EN, D); Hybomys badius (EN, D); Hybomys basilii (EN, U); Hylomyscus baeri (EN, D); Hylomyscus grandis (CR, D); Lamottemys okuensis (EN, D); Leopoldamys siporanus (EN, D); Leporillus apicalis (CR, U); Lophuromys dieterleni (EN, D); Lophuromys eisentrauti (EN, D); Lophuromys rahmi (EN, U); Mallomys gunung (EN, D); Maxomys pagensis (EN, D); Maxomys wattsi (EN, D); Melomys aereus (EN, D); Melomys bannisteri (EN, D); Melomys caurinus (EN, D); Melomys fraterculus (CR, D); Melomys matambuai (EN, D); Melomys rubicola (CR, U); Melomys talaudium (EN, D); Meriones dahli (EN, D); Millardia kondana (CR, D); Mus famulus (EN, D); Mus fernandoni (EN, D); Nesokia bunnii (EN, D); Nesoromys ceramicus (EN, D); Nilopegomys plumbeus (CR, U); Notomys aquilo (EN, D); Otomys barbouri (EN, D); Otomys burtoni (EN, D); Otomys jacksoni (EN, U); Otomys uzungwensis (EN, U); Paraleptomys rufilatus (EN, U); Paramelomys gressitti (EN, U); Paulamys naso (EN, D); Pogonomys fergussoniensis (EN, D); Praomys hartwigi (EN, D); Praomys morio (EN, D); Praomys obscurus (EN, D); Pseudomys fumeus (EN, D); Rattus burrus (EN, D); Rattus hainaldi (EN, D); Rattus lugens (EN, D); Rattus montanus (EN, U); Rattus ranjinae (EN, D); Rattus simalurensis (EN, D); Rattus vandeuseni (EN, D); Solomys poncetletti (CR, D); Solomys salebrosus (EN, D); Solomys sapientis (EN, D); Sundamys maxi (EN, D); Tokudaia muenninki (CR, D); Tokudaia osimensis (EN, D); Tokudaia tokunoshimensis (EN, D); Uromys boeadii (CR, D); Uromys emmae (CR, U); Uromys imperator (CR, U); Uromys porculus (CR, U); Uromys rex (EN, D); Vandelevria nilagrica (EN, D); Vandelevria nolthenii (EN, D); Zyzomys palatalis (CR, U); Zyzomys pedunculatus (CR, U); Brachytarsomys villosa (EN, U); Dendromys kahuziensis (CR, D); Eliurus penicillatus (EN, U); Hypogeomys antimena (EN, D); Macrotarsomys ingens (EN, D); Mystromys albicaudatus (EN, D); Nesomys lambertoni (EN, U); Voalavo antsahabensis (EN, U); Octodon pacificus (CR, D); Pipanacoctomys aureus (CR, D); Salinoctomys loschalchalerosorum (CR, D); Ammospermophilus nelsoni (EN, D); Biswamoyopterus biswasi (CR, D); Cynomys parvidens (EN, D); Eupetaurus cinereus (EN, U); Hylopetes sipora (EN, D); Iomys sipora (EN, D); Marmota sibirica (EN, D); Paraxerus vincenti (EN, D); Petinomys lugens (EN, D); Pteromyscus pulverulentus (EN, D); Spermophilus atricapillus (EN, D); Spermophilus brunneus (EN, D); Spermophilus perotensis (EN, D); Sundasciurus fraterculus (EN, D); Tamiasciurus mearnsi (EN, D); Tamias palmeri (EN, D); Spalax arenarius (EN, D); Tachyoryctes macrocephalus (EN, D); Tupaia chrysogaster (EN, D); Tupaia nicobarica (EN, D)

**REPTILIA:** Crocodylus mindorensis (CR, ); Crocodylus siamensis (CR, D); Calotes liocephalus (EN, ); Ceratophora tennentii (EN, ); Cophotis dumbara (CR, U); Otocryptis beddomii (EN, S); Phrynocephalus golubewii (CR, D); Phrynocephalus horvathi (CR, D); Cynisca gansi (CR, U); Cynisca kigomensis (CR, U); Cynisca oligopholis (EN, U); Abronia aurita (EN, U); Abronia campbelli (CR, D); Abronia chiszari (EN, D); Abronia deppii (EN, D); Abronia frosti (CR, D); Abronia fuscolabialis (EN, D); Abronia graminea (EN, D); Abronia martindelcampoi (EN, D); Abronia matudai (EN, U); Abronia meledona (EN, U); Abronia montecristoi (EN, D); Abronia salvadorensis (EN, D); Barisia herrerae (EN, D); Barisia rudicollis (EN, S); Celestus anelpistus (CR, D); Celestus bivittatus (EN, D); Celestus warreni (CR, D); Diploglossus montisserrati (CR, ); Gerrhonotus parvus (EN, D); Mesaspis juarezi (EN, D); Ophisaurus ceroni (EN, D); Anniella geronimensis (EN, D); Corallus cropanii (EN, U); Epicrates monensis (EN, U); Casarea dussumieri (EN, ); Calamaria ingeri (CR, U); Calamaria prakkei (CR, D); Calamaria yunnanensis (EN, U); Pseudorabdion montanum (EN, D); Nephurus deleani (EN, ); Phyllurus gulbaru (CR, U); Archaius tigris (EN, D);

## S7 Table continued

Bradyrodion caffer (EN, U); Bradyrodion taeniabronchum (EN, U); Brookesia bekoloso (EN, D); Brookesia bonisi (CR, D); Brookesia decaryi (EN, D); Brookesia dentata (EN, D); Brookesia exarmata (EN, D); Brookesia karchei (EN, D); Brookesia lineata (EN, U); Brookesia perarmata (EN, D); Brookesia ramanantsoai (EN, D); Brookesia valerieae (EN, U); Calumma andringitraense (EN, D); Calumma furcifer (EN, D); Calumma gallus (EN, D); Calumma glawi (EN, D);

Calumma globifer (EN, D); Calumma hafahafa (CR, D); Calumma hilleni (EN, D); Calumma tarzan (CR, D); Calumma vencesi (EN, D); Furcifer balteatus (EN, D); Furcifer belandaensis (CR, D); Furcifer minor (EN, D); Furcifer nicosi (EN, D); Rhampholeon spinosus (EN, U); Ahaetulla perroteti (EN, U); Boiga boureleti (EN, U); Boiga saengsomi (EN, U); Chironius vincenti (CR, U); Euprepophis perlacea (EN, D); Ficimia hardyi (EN, D); Gongylosoma mukutense (CR, U); Hierophis cypriensis (EN, D); Lampropeltis herrerae (CR, D); Lycodon chrysoprateros (CR, D); Masticophis anthonyi (CR, U); Oligodon booliati (CR, U); Oligodon meyerinkii (EN, D); Oxybelis wilsoni (EN, D); Pituophis ruthveni (EN, D); Tantilla flavilineata (EN, S); Tantilla lempira (EN, U); Tantilla oolitica (EN, D); Tantilla shawi (EN, U); Telescopus hoogstraali (EN, D); Cordylus aridus (EN, U); Cordylus meculae (EN, U); Crotaphytus antiquus (EN, D); Gambelia sila (EN, D); Anolis ahli (EN, U); Anolis amplisquamosus (EN, D); Anolis breedlovei (EN, D); Anolis cusuco (EN, S); Anolis guafe (EN, U); Anolis haetianus (EN, U); Anolis hobartsmithi (EN, D); Anolis juangundlachi (CR, U); Anolis koopmani (EN, U); Anolis loveridgei (EN, S); Anolis marron (EN, U); Anolis proboscis (EN, U); Anolis pygmaeus (EN, D); Anolis roosevelti (CR, U); Anolis ruizii (EN, U); Anolis strahmi (EN, U); Bavayia exsuccida (EN, D); Bavayia goroensis (EN, D); Bavayia ornata (EN, U); Eurydactylodes occidentalis (CR, D); Eurydactylodes symmetricus (EN, D); Rhacodactylus trachyrhynchus (EN, U); Adelphicos daryi (EN, U); Adelphicos ibarrorum (EN, U); Alsophis antiquae (CR, I); Alsophis rijgersmaei (EN, U); Alsophis rufiventris (EN, U); Alsophis sanctonum (EN, U); Calamodontophis ronaldi (EN, U); Chapinophis xanthocheilus (EN, U); Chersodromus rubriventris (EN, D); Enulius roatenensis (EN, D); Geophis damiani (CR, D); Geophis talamancae (EN, U); Liophis cursor (CR, U); Liophis ornatus (EN, U); Liophis perfuscus (EN, U); Liophis williamsi (EN, U); Omoadiphas cannula (CR, D); Omoadiphas texiguatensis (CR, D); Rhadinaea marcellae (EN, D); Rhadinaea montana (EN, D); Rhadinaea stadelmani (EN, D); Rhadinaea tolpanorum (CR, D); Trimetopon simile (EN, U); Trimetopon viquezi (CR, U); Aipysurus apraefrontalis (CR, D); Aipysurus foliosquama (CR, D); Aipysurus fuscus (EN, D); Elapsoidea chelazzii (EN, U); Elapsoidea nigra (EN, U); Micrurus ruatanus (CR, D); Ogmodon vitianus (EN, D); Goniurosaurus kuroiwae (EN, U); Cnemaspis anakattiensis (CR, U); Cnemaspis goaensis (EN, U); Cnemaspis occidentalis (EN, U); Cnemaspis wynadensis (EN, U); Dierogecko inexpectatus (CR, D); Dierogecko kaalaensis (CR, U); Dierogecko koniambo (CR, D); Dierogecko nehoueensis (CR, D); Dierogecko poumensis (CR, S); Dierogecko thomaswhitei (CR, U); Dierogecko validiclavis (EN, U); Ebenavia maintimaitia (EN, D); Geckoella jeyporensis (CR, U); Gehyra barea (EN, U); Hemidactylus bouvieri (CR, U); Hemidactylus dracaenacolus (CR, D); Hemidactylus kundaensis (CR, U); Lepidodactylus euaensis (CR, S); Luperosaurus joloensis (EN, D); Luperosaurus macgregori (EN, D); Lygodactylus intermedius (EN, D); Lygodactylus mirabilis (CR, U); Lygodactylus ornatus (EN, U); Lygodactylus roavolana (EN, D); Lygodactylus williamsi (CR, D); Mediodactylus amictopholis (EN, D); Oedodera marmorata (CR, U); Paragehyra gabriellae (EN, D); Paroedura lohatsara (CR, D); Paroedura masobe (EN, D); Paroedura sanctijohannis (EN, U); Paroedura tanjaka (EN, U); Perochirus ateles (EN, D); Phelsuma antanosy (CR, D); Phelsuma flavigularis (EN, D); Phelsuma guentheri (EN, U); Phelsuma klemmeri (EN, U); Phelsuma masohoala (CR, U); Phelsuma pronki (CR, D); Phelsuma robertmertensi (EN, U); Phelsuma roesleri (EN, U); Phelsuma seippi (EN, U); Phelsuma serraticauda (EN, D); Phelsuma vanheygeni (EN, U); Uroplatus guentheri (EN, D); Uroplatus malahelo (EN, D); Uroplatus pietschmanni (EN, U); Zonosaurus subunicolor (EN, D); Calyptommatus confusionibus (EN, U); Gymnophthalmus pleii (EN, U); Macropholidus annectens (EN, U); Riama balneator (EN, U); Riama oculata (EN, U); Riama petrorum (EN, U); Cerberus microlepis (EN, D); Enhydryis vorisi (EN, U); Brachylophus bulabula (EN, D); Brachylophus fasciatus (EN, D); Brachylophus vitiensis (CR, D); Conolophus marthae (CR, U); Ctenosaura bakeri (CR, D); Ctenosaura melanosterna (EN, D); Ctenosaura oaxacana (CR, D); Ctenosaura oedirhina (EN, D); Ctenosaura palearis (EN, D); Ctenosaura quinquecarinata (EN, D); Cyclura carinata (CR, D); Cyclura collei (CR, U); Cyclura lewisi (EN, I); Cyclura pinguis (CR, U); Cyclura ricardii (CR, D); Cyclura rileyi (EN, U); Cyclura stejnegeri (EN, D); Iguana delicatissima (EN, D); Acanthodactylus ahmaddisii (EN, D); Acanthodactylus beershebensis (CR, D); Acanthodactylus blanci (EN, D); Acanthodactylus harranensis (CR, D); Acanthodactylus mechriguensis (CR, D); Acanthodactylus schreiberi (EN, D); Acanthodactylus spinicauda (CR, D); Algyroides marchi (EN, D); Darevskia bendimahiensis (EN, U); Darevskia clarkorum (EN, D); Darevskia dryada (CR, D); Darevskia rostombekovi (EN, D); Darevskia uezelli (EN, D); Eremias pleskei (CR, D); Gallotia auaritae (CR, U); Gallotia bravoana (CR, I); Gallotia intermedia (CR, I); Gallotia simonyi (CR, S); Iberolacerta aramica (EN, D); Iberolacerta aurelioi (EN, D); Iberolacerta cyreni (EN, D); Iberolacerta martinezricai (CR, D); Parvilacerta fraasii (EN, D); Philochortus zolii (EN, D); Phoenicolacerta kulzeri (EN, D); Podarcis carbonelli (EN, D); Podarcis cretensis (EN, D); Podarcis lilfordi (EN, D); Podarcis raffonei (CR, D); Psammotriton microdactylus (EN, D); Takydromus toyamai (EN, U); Lamprophis geometricus (EN, D); Amphisema metusia (EN, D); Hologerrhonotus dermali (EN, D); Lycognathophis seychellensis (EN, D); Opisthotropis alcalai (EN, D); Opisthotropis kikuzatoi (CR, U); Thamnophis melanogaster (EN, D); Thamnophis mendax (EN, D); Sceloporus chaneyi (EN, D); Sceloporus cyanostictus (EN, D); Sceloporus exsul (CR, D); Sceloporus goldmani (EN, D); Uma exsul (EN, D); Uma inornata (EN, D); Urosaurus auriculatus (EN, D); Tarentola gigas (EN, S); Prosymna ornaticauda (CR, U); Alluaudia moccuardi (EN, U); Compsophis vinckei (CR, D); Heteroliodon fohy (EN, D); Liophidium mayottensis (EN, U); Lycodryas guentheri (EN, D); Lycodryas inopiniae (EN, U); Phisalixella variabilis (EN, D); Pseudoxyrhopus ankafinaensis (CR, U); Pseudoxyrhopus kely (EN, D); Thamnosophis martae (EN, D); Aprasia aurita (CR, U); Afroablepharus annobonensis (CR, U); Amphiglossus decaryi (EN, U); Brachymeles cebuensis (CR, D); Brachymeles vermis (EN, D); Caledoniscincus auratus (EN, U); Caledoniscincus chazeaui (EN, U); Caledoniscincus orestes (EN, U); Caledoniscincus renevieri (EN, U); Capitellum parvicruzae (CR, D); Celatiscincus euryotis (EN, U); Celatiscincus similis (EN, U); Chalcides ebneri (CR, D); Chalcides mauritanicus (EN, D); Chalcides parallelus (EN, D); Chalcides simonyi (EN, D); Chioninia vaillantii (EN, D); Dasia subcaerulea (EN, U); Emoia adspersa (EN, D); Emoia aneityumensis (EN, D); Emoia boettgeri (EN, D); Emoia campbelli (EN, D); Emoia lawesi (EN, U); Emoia mokosariniveikau (EN, D); Emoia nativitatis (CR, D); Emoia ponapea (EN, D); Emoia samoensis (EN, D); Emoia slevini (CR, D); Emoia trossula (EN, D); Eulamprus leuraensis (EN, U); Eurylepis poonaensis (EN, U); Eutropis clivicola (EN, U); Geoscincus haraldmeieri (CR, U); Janetaescincus braueri (EN, D); Janetaescincus veseyfitzgeraldi (EN, D); Kanakysaurus viviparus (EN, U); Kanakysaurus zebratus (EN, U); Lankascincus deignani (EN, U); Leiopisma alazon (CR, D); Leptosiaophos pauliani (EN, U); Leriosta allanae (CR, U); Leriosta vittata (EN, U); Lioscincus marua (EN, U); Lioscincus steindachneri (EN, U); Lioscincus vivae (CR, U); Madascincus arenicola (CR, U); Madascincus macrolepis (EN, D); Marisora roatanae (CR, D); Marmorosphax kaala (CR, U); Marmorosphax taom (CR, U); Mochlus mafianum (EN, U); Nannoscincus exos (CR, U); Nannoscincus garrulus (EN, U); Nannoscincus greeri (EN, D); Nannoscincus hanchisteus (CR, U); Nannoscincus humectus (EN, U); Nannoscincus manautei (CR, U); Nannoscincus slevini (EN, U); Oligosoma ottagense (EN, D); Paracontias fasika (CR, D); Paracontias minimus (CR, D); Paracontias rothschildi (CR, U); Phoboscincus bocourti (EN, U); Plestiodon longirostris (CR, U); Pseudoacontias angelorum (EN, U); Pseudoacontias menamainty (CR, U); Pygomeles petteri (EN, D); Scelotes inornatus (EN, U); Sirenosincus yamagishi (EN, D); Sphenomorphus biparietalis (EN, D); Spondylurus culebrae (CR, D); Spondylurus magnacruzae (CR, D); Spondylurus monae (CR, U); Spondylurus monitae (CR, U); Spondylurus nitidus (EN, D); Spondylurus semitaeniatus (CR, D); Spondylurus sloanii (CR, D); Spondylurus spilonotus (CR, D); Tiliqua adelaidensis (EN, U); Voeltzkowia mira (EN, D); Gonatodes daudini (CR, S); Sphaerodactylus armasi (EN, U); Sphaerodactylus micropithecus (EN, U); Sphaerodactylus pimienta (EN, U); Sphaerodactylus storeyae (EN, U); Sphaerodactylus williamsi (CR, U); Ameiva polops (CR, U); Ameiva vittata (CR, U); Tropidophis hendersoni (CR, U); Liolaemus arambarensis (EN, U); Stenocercus haenschii (CR, U); Afrotyphlops gierrai (EN, U); Ramphotyphlops suluensis (EN, D); Typhlops capitulatus (EN, U); Typhlops hectus (EN, U); Typhlops lazelli (CR, U); Typhlops monensis (EN, U); Typhlops schmutzi (EN, U); Typhlops tasymicris (EN, U); Xenotyphlops grandidieri (CR, U); Platylepturus madurensis (EN, U); Rhinophis travancoricus (EN, U); Varanus mabitang (EN, D); Bothropoides alcatraz (CR, S); Bothrops lojanus (EN, U); Crotalus catalinensis (CR, D); Crotalus pusillus (EN, U); Crotalus unicolor (CR, U); Cryptelytropis kanburiensis (EN, U); Macrovipera schweizeri (EN, S); Mixcoatlus barbouri (EN, D); Mixcoatlus melanurus (EN, D); Montivipera albizona (EN, D); Montivipera bornmuelleri (EN, D); Montivipera latifii (EN, D); Montivipera wagneri (CR, D); Popeia buniana (EN, U); Protobothrops mangshanensis (EN, D); Protobothrops sieversorum (EN, U); Protobothrops trungkhanhensis (EN, U); Vipera anatolica (CR, D); Vipera darevskii (CR, D); Vipera kaznakovi (EN, D); Vipera magnifica (EN, D); Vipera orlovi (CR, D); Vipera pontica (EN, U); Viridovipera truongsongensis (EN, U); Lepidophyma lipetzi (EN, D); Xenosaurus newmanorum (EN, D); Xenosaurus platyceps (EN, D); Chelodina mccordi (CR, U); Chelodina pritchardi (EN, U); Elseya bellii (EN, U); Elusor macrurus (EN, U); Mesoclemmys dahli (CR, U); Mesoclemmys hogei (EN, U); Dermatemyx mawii (CR, D); Clemmys guttata (EN, D); Emydoidea blandingii (EN, D); Glyptemys muhlenbergii (CR, U); Graptemys caglei (EN, D); Graptemys gibbonsi (EN, D); Graptemys pearlensis (EN, D); Pseudemys alabamensis (EN, U); Terrapene coahuila (EN, D); Trachemys adiutrix (EN, U); Trachemys taylori (EN, D); Batagur baska (CR, U); Batagur borneoensis (CR, U); Batagur dhongka (EN, U); Batagur kachuga (CR, U); Batagur trivittata (EN, U); Cuora aurocapitata (CR, U); Cuora flavomarginata (EN, U); Cuora galbinifrons (CR, U); Cuora mccordi (CR, U); Cuora

**S7 Table continued**

mouhotii (EN, ); Cuora pani (CR, ); Cuora trifasciata (CR, ); Cuora yunnanensis (CR, D); Cuora zhoui (CR, ); Geoemyda japonica (EN, ); Geoemyda spengleri (EN, ); Heosemys annandalii (EN, ); Heosemys depressa (CR, ); Heosemys spinosa (EN, ); Leucocephalon yuwonoi (CR, ); Mauremys annamensis (CR, ); Mauremys mutica (EN, ); Mauremys nigricans (EN, ); Mauremys reevesii (EN, U); Mauremys sinensis (EN, ); Orlitia borneensis (EN, ); Pangshura sylhetensis (EN, ); Sacalia bealei (EN, ); Sacalia quadriocellata (EN, ); Siebenrockiella leytenis (CR, ); Vijayachelys silvatica (EN, U); Sternotherus depressus (CR, D); Platysternon megacephalum (EN, ); Erymnochelys madagascariensis (CR, D); Podocnemis lewyana (EN, ); Astrochelys radiata (CR, D); Astrochelys yniphora (CR, D); Geochelone platynota (CR, ); Indotestudo elongata (EN, ); Indotestudo forstenii (EN, ); Manouria emys (EN, ); Psammobates geometricus (EN, ); Pyxis arachnoides (CR, D); Pyxis planicauda (CR, D); Testudo kleinmanni (CR, D); Chitra chitra (CR, ); Chitra indica (EN, ); Nilssonina formosa (EN, ); Palea steindachneri (EN, ); Pelochelys cantorii (EN, ); Rafetus euphraticus (EN, ); Rafetus swinhoei (CR, )
