# Supplementary material for: Popular interest in vertebrates does not reflect extinction risk and is associated with bias in conservation investment
Source: PubMed Central journal article supplement (PMC6157853; doi:10.1371/journal.pone.0203694), 2018-09-26
Supplement: pone.0203694.s009.pdf [file pone.0203694.s009.pdf]

**S8 Table. Species that were omitted from the analysis due to containing one or more identical common names and having highly correlated monthly web search interest (Pearson's correlation >0.90).** It was not possible to establish which of the two or more species that shared a name and were highly correlated were responsible for driving search interest. All pairwise correlations are presented for 141 unique taxa that were omitted from the analysis leading to Figures 2-4, Table 1 and supplementary Tables S1-S6.

| 1 <sup>st</sup> Species            | 2 <sup>nd</sup> Species            | Pearson's correlation | Shared common names |
|------------------------------------|------------------------------------|-----------------------|---------------------|
| <i>Caranx vinctus</i>              | <i>Epinephelus adscensionis</i>    | 0.95                  | Jack                |
| <i>Caranx vinctus</i>              | <i>Selene peruviana</i>            | 0.96                  | Jack                |
| <i>Delphinapterus leucas</i>       | <i>Huso huso</i>                   | 0.96                  | Beluga              |
| <i>Epinephelus adscensionis</i>    | <i>Caranx vinctus</i>              | 0.95                  | Jack                |
| <i>Epinephelus adscensionis</i>    | <i>Selene peruviana</i>            | 0.94                  | Jack                |
| <i>Lophiodes caularis</i>          | <i>Lophius gastrophysus</i>        | 0.98                  | Rape                |
| <i>Lophius gastrophysus</i>        | <i>Lophiodes caularis</i>          | 0.98                  | Rape                |
| <i>Selene peruviana</i>            | <i>Caranx vinctus</i>              | 0.96                  | Jack                |
| <i>Selene peruviana</i>            | <i>Epinephelus adscensionis</i>    | 0.94                  | Jack                |
| <i>Lynx lynx</i>                   | <i>Lynx rufus</i>                  | 0.93                  | Lince               |
| <i>Lynx rufus</i>                  | <i>Lynx lynx</i>                   | 0.93                  | Lince               |
| <i>Myocastor coypus</i>            | <i>Lutra lutra</i>                 | 0.95                  | Nutria              |
| <i>Bunocephalus coracoideus</i>    | <i>Chrysichthys nigrodigitatus</i> | 0.99                  | Catfish             |
| <i>Bunocephalus coracoideus</i>    | <i>Clarias agboyiensis</i>         | 0.99                  | Catfish             |
| <i>Bunocephalus coracoideus</i>    | <i>Clarias anguillaris</i>         | 0.99                  | Catfish             |
| <i>Bunocephalus coracoideus</i>    | <i>Glyptothorax indicus</i>        | 0.99                  | Catfish             |
| <i>Bunocephalus coracoideus</i>    | <i>Heterobranchus longifilis</i>   | 0.99                  | Catfish             |
| <i>Bunocephalus coracoideus</i>    | <i>Rineloricaria lima</i>          | 0.99                  | Catfish             |
| <i>Bunocephalus coracoideus</i>    | <i>Rineloricaria thrissoceps</i>   | 0.99                  | Catfish             |
| <i>Bunocephalus coracoideus</i>    | <i>Spatuloricaria evansii</i>      | 0.99                  | Catfish             |
| <i>Bunocephalus coracoideus</i>    | <i>Synodontis filamentosus</i>     | 0.99                  | Catfish             |
| <i>Bunocephalus coracoideus</i>    | <i>Synodontis membranaceus</i>     | 0.99                  | Catfish             |
| <i>Bunocephalus coracoideus</i>    | <i>Synodontis nigrita</i>          | 0.99                  | Catfish             |
| <i>Bunocephalus coracoideus</i>    | <i>Synodontis schall</i>           | 0.99                  | Catfish             |
| <i>Chrysichthys nigrodigitatus</i> | <i>Bunocephalus coracoideus</i>    | 0.99                  | Catfish             |
| <i>Chrysichthys nigrodigitatus</i> | <i>Clarias agboyiensis</i>         | 0.99                  | Catfish, Mudfish    |
| <i>Chrysichthys nigrodigitatus</i> | <i>Clarias anguillaris</i>         | 0.99                  | Catfish, Mudfish    |
| <i>Chrysichthys nigrodigitatus</i> | <i>Glyptothorax indicus</i>        | 0.99                  | Catfish             |
| <i>Chrysichthys nigrodigitatus</i> | <i>Heterobranchus longifilis</i>   | 0.99                  | Catfish             |
| <i>Chrysichthys nigrodigitatus</i> | <i>Rineloricaria lima</i>          | 0.99                  | Catfish             |
| <i>Chrysichthys nigrodigitatus</i> | <i>Rineloricaria thrissoceps</i>   | 0.99                  | Catfish             |
| <i>Chrysichthys nigrodigitatus</i> | <i>Spatuloricaria evansii</i>      | 0.99                  | Catfish             |
| <i>Chrysichthys nigrodigitatus</i> | <i>Synodontis filamentosus</i>     | 0.99                  | Catfish             |
| <i>Chrysichthys nigrodigitatus</i> | <i>Synodontis membranaceus</i>     | 0.99                  | Catfish             |
| <i>Chrysichthys nigrodigitatus</i> | <i>Synodontis nigrita</i>          | 0.99                  | Catfish             |
| <i>Chrysichthys nigrodigitatus</i> | <i>Synodontis schall</i>           | 0.99                  | Catfish             |
| <i>Clarias agboyiensis</i>         | <i>Bunocephalus coracoideus</i>    | 0.99                  | Catfish             |
| <i>Clarias agboyiensis</i>         | <i>Chrysichthys nigrodigitatus</i> | 0.99                  | Catfish, Mudfish    |
| <i>Clarias agboyiensis</i>         | <i>Clarias anguillaris</i>         | 0.99                  | Catfish, Mudfish    |
| <i>Clarias agboyiensis</i>         | <i>Glyptothorax indicus</i>        | 0.99                  | Catfish             |
| <i>Clarias agboyiensis</i>         | <i>Heterobranchus longifilis</i>   | 0.99                  | Catfish             |
| <i>Clarias agboyiensis</i>         | <i>Rineloricaria lima</i>          | 0.99                  | Catfish             |
| <i>Clarias agboyiensis</i>         | <i>Rineloricaria thrissoceps</i>   | 0.99                  | Catfish             |
| <i>Clarias agboyiensis</i>         | <i>Spatuloricaria evansii</i>      | 0.99                  | Catfish             |
| <i>Clarias agboyiensis</i>         | <i>Synodontis filamentosus</i>     | 0.99                  | Catfish             |
| <i>Clarias agboyiensis</i>         | <i>Synodontis membranaceus</i>     | 0.99                  | Catfish             |
| <i>Clarias agboyiensis</i>         | <i>Synodontis nigrita</i>          | 0.99                  | Catfish             |
| <i>Clarias agboyiensis</i>         | <i>Synodontis schall</i>           | 0.99                  | Catfish             |

S8 Table continued

| 1 <sup>st</sup> Species          | 2 <sup>nd</sup> Species            | Pearson's correlation | Shared common names    |
|----------------------------------|------------------------------------|-----------------------|------------------------|
| <i>Clarias anguillaris</i>       | <i>Bunocephalus coracoideus</i>    | 0.99                  | Catfish                |
| <i>Clarias anguillaris</i>       | <i>Chrysichthys nigrodigitatus</i> | 0.99                  | Catfish, Mudfish       |
| <i>Clarias anguillaris</i>       | <i>Clarias agboyiensis</i>         | 0.99                  | Catfish, Mudfish       |
| <i>Clarias anguillaris</i>       | <i>Glyptothorax indicus</i>        | 0.99                  | Catfish                |
| <i>Clarias anguillaris</i>       | <i>Heterobranchus longifilis</i>   | 0.99                  | Catfish                |
| <i>Clarias anguillaris</i>       | <i>Rineloricaria lima</i>          | 0.99                  | Catfish                |
| <i>Clarias anguillaris</i>       | <i>Rineloricaria thrissoceps</i>   | 0.99                  | Catfish                |
| <i>Clarias anguillaris</i>       | <i>Spatuloricaria evansii</i>      | 0.99                  | Catfish                |
| <i>Clarias anguillaris</i>       | <i>Synodontis filamentosus</i>     | 0.99                  | Catfish                |
| <i>Clarias anguillaris</i>       | <i>Synodontis membranaceus</i>     | 0.99                  | Catfish                |
| <i>Clarias anguillaris</i>       | <i>Synodontis nigrita</i>          | 0.99                  | Catfish                |
| <i>Clarias anguillaris</i>       | <i>Synodontis schall</i>           | 0.99                  | Catfish                |
| <i>Glyptothorax indicus</i>      | <i>Bunocephalus coracoideus</i>    | 0.99                  | Catfish                |
| <i>Glyptothorax indicus</i>      | <i>Chrysichthys nigrodigitatus</i> | 0.99                  | Catfish                |
| <i>Glyptothorax indicus</i>      | <i>Clarias agboyiensis</i>         | 0.99                  | Catfish                |
| <i>Glyptothorax indicus</i>      | <i>Clarias anguillaris</i>         | 0.99                  | Catfish                |
| <i>Glyptothorax indicus</i>      | <i>Heterobranchus longifilis</i>   | 0.99                  | Catfish                |
| <i>Glyptothorax indicus</i>      | <i>Rineloricaria lima</i>          | 0.99                  | Catfish                |
| <i>Glyptothorax indicus</i>      | <i>Rineloricaria thrissoceps</i>   | 0.99                  | Catfish                |
| <i>Glyptothorax indicus</i>      | <i>Spatuloricaria evansii</i>      | 0.99                  | Catfish                |
| <i>Glyptothorax indicus</i>      | <i>Synodontis filamentosus</i>     | 0.99                  | Catfish                |
| <i>Glyptothorax indicus</i>      | <i>Synodontis membranaceus</i>     | 0.99                  | Catfish                |
| <i>Glyptothorax indicus</i>      | <i>Synodontis nigrita</i>          | 0.99                  | Catfish                |
| <i>Glyptothorax indicus</i>      | <i>Synodontis schall</i>           | 0.99                  | Catfish                |
| <i>Heterobranchus longifilis</i> | <i>Bunocephalus coracoideus</i>    | 0.99                  | Catfish                |
| <i>Heterobranchus longifilis</i> | <i>Chrysichthys nigrodigitatus</i> | 0.99                  | Catfish                |
| <i>Heterobranchus longifilis</i> | <i>Clarias agboyiensis</i>         | 0.99                  | Catfish                |
| <i>Heterobranchus longifilis</i> | <i>Clarias anguillaris</i>         | 0.99                  | Catfish                |
| <i>Heterobranchus longifilis</i> | <i>Glyptothorax indicus</i>        | 0.99                  | Catfish                |
| <i>Heterobranchus longifilis</i> | <i>Rineloricaria lima</i>          | 0.99                  | Catfish                |
| <i>Heterobranchus longifilis</i> | <i>Rineloricaria thrissoceps</i>   | 0.99                  | Catfish                |
| <i>Heterobranchus longifilis</i> | <i>Spatuloricaria evansii</i>      | 0.99                  | Catfish                |
| <i>Heterobranchus longifilis</i> | <i>Synodontis filamentosus</i>     | 0.99                  | Catfish                |
| <i>Heterobranchus longifilis</i> | <i>Synodontis membranaceus</i>     | 0.99                  | Catfish                |
| <i>Heterobranchus longifilis</i> | <i>Synodontis nigrita</i>          | 0.99                  | Catfish                |
| <i>Heterobranchus longifilis</i> | <i>Synodontis schall</i>           | 0.99                  | Catfish                |
| <i>Rineloricaria lima</i>        | <i>Bunocephalus coracoideus</i>    | 0.99                  | Catfish                |
| <i>Rineloricaria lima</i>        | <i>Chrysichthys nigrodigitatus</i> | 0.99                  | Catfish                |
| <i>Rineloricaria lima</i>        | <i>Clarias agboyiensis</i>         | 0.99                  | Catfish                |
| <i>Rineloricaria lima</i>        | <i>Clarias anguillaris</i>         | 0.99                  | Catfish                |
| <i>Rineloricaria lima</i>        | <i>Glyptothorax indicus</i>        | 0.99                  | Catfish                |
| <i>Rineloricaria lima</i>        | <i>Heterobranchus longifilis</i>   | 0.99                  | Catfish                |
| <i>Rineloricaria lima</i>        | <i>Rineloricaria thrissoceps</i>   | 0.99                  | Catfish, Vieja de agua |
| <i>Rineloricaria lima</i>        | <i>Spatuloricaria evansii</i>      | 0.99                  | Catfish, Vieja de agua |
| <i>Rineloricaria lima</i>        | <i>Synodontis filamentosus</i>     | 0.99                  | Catfish                |
| <i>Rineloricaria lima</i>        | <i>Synodontis membranaceus</i>     | 0.99                  | Catfish                |
| <i>Rineloricaria lima</i>        | <i>Synodontis nigrita</i>          | 0.99                  | Catfish                |

S8 Table continued

| 1 <sup>st</sup> Species          | 2 <sup>nd</sup> Species            | Pearson's correlation | Shared common names    |
|----------------------------------|------------------------------------|-----------------------|------------------------|
| <i>Rineloricaria lima</i>        | <i>Synodontis schall</i>           | 0.99                  | Catfish                |
| <i>Rineloricaria thrissoceps</i> | <i>Bunocephalus coracoideus</i>    | 0.99                  | Catfish                |
| <i>Rineloricaria thrissoceps</i> | <i>Chrysichthys nigrodigitatus</i> | 0.99                  | Catfish                |
| <i>Rineloricaria thrissoceps</i> | <i>Clarias agboyiensis</i>         | 0.99                  | Catfish                |
| <i>Rineloricaria thrissoceps</i> | <i>Clarias anguillaris</i>         | 0.99                  | Catfish                |
| <i>Rineloricaria thrissoceps</i> | <i>Glyptothorax indicus</i>        | 0.99                  | Catfish                |
| <i>Rineloricaria thrissoceps</i> | <i>Heterobranchus longifilis</i>   | 0.99                  | Catfish                |
| <i>Rineloricaria thrissoceps</i> | <i>Rineloricaria lima</i>          | 0.99                  | Catfish, Vieja de agua |
| <i>Rineloricaria thrissoceps</i> | <i>Spatuloricaria evansii</i>      | 0.99                  | Catfish, Vieja de agua |
| <i>Rineloricaria thrissoceps</i> | <i>Synodontis filamentosus</i>     | 0.99                  | Catfish                |
| <i>Rineloricaria thrissoceps</i> | <i>Synodontis membranaceus</i>     | 0.99                  | Catfish                |
| <i>Rineloricaria thrissoceps</i> | <i>Synodontis nigrita</i>          | 0.99                  | Catfish                |
| <i>Rineloricaria thrissoceps</i> | <i>Synodontis schall</i>           | 0.99                  | Catfish                |
| <i>Spatuloricaria evansii</i>    | <i>Bunocephalus coracoideus</i>    | 0.99                  | Catfish                |
| <i>Spatuloricaria evansii</i>    | <i>Chrysichthys nigrodigitatus</i> | 0.99                  | Catfish                |
| <i>Spatuloricaria evansii</i>    | <i>Clarias agboyiensis</i>         | 0.99                  | Catfish                |
| <i>Spatuloricaria evansii</i>    | <i>Clarias anguillaris</i>         | 0.99                  | Catfish                |
| <i>Spatuloricaria evansii</i>    | <i>Glyptothorax indicus</i>        | 0.99                  | Catfish                |
| <i>Spatuloricaria evansii</i>    | <i>Heterobranchus longifilis</i>   | 0.99                  | Catfish                |
| <i>Spatuloricaria evansii</i>    | <i>Rineloricaria lima</i>          | 0.99                  | Catfish, Vieja de agua |
| <i>Spatuloricaria evansii</i>    | <i>Rineloricaria thrissoceps</i>   | 0.99                  | Catfish, Vieja de agua |
| <i>Spatuloricaria evansii</i>    | <i>Synodontis filamentosus</i>     | 0.99                  | Catfish                |
| <i>Spatuloricaria evansii</i>    | <i>Synodontis membranaceus</i>     | 0.99                  | Catfish                |
| <i>Spatuloricaria evansii</i>    | <i>Synodontis nigrita</i>          | 0.99                  | Catfish                |
| <i>Spatuloricaria evansii</i>    | <i>Synodontis schall</i>           | 0.99                  | Catfish                |
| <i>Synodontis filamentosus</i>   | <i>Bunocephalus coracoideus</i>    | 0.99                  | Catfish                |
| <i>Synodontis filamentosus</i>   | <i>Chrysichthys nigrodigitatus</i> | 0.99                  | Catfish                |
| <i>Synodontis filamentosus</i>   | <i>Clarias agboyiensis</i>         | 0.99                  | Catfish                |
| <i>Synodontis filamentosus</i>   | <i>Clarias anguillaris</i>         | 0.99                  | Catfish                |
| <i>Synodontis filamentosus</i>   | <i>Glyptothorax indicus</i>        | 0.99                  | Catfish                |
| <i>Synodontis filamentosus</i>   | <i>Heterobranchus longifilis</i>   | 0.99                  | Catfish                |
| <i>Synodontis filamentosus</i>   | <i>Rineloricaria lima</i>          | 0.99                  | Catfish                |
| <i>Synodontis filamentosus</i>   | <i>Rineloricaria thrissoceps</i>   | 0.99                  | Catfish                |
| <i>Synodontis filamentosus</i>   | <i>Spatuloricaria evansii</i>      | 0.99                  | Catfish                |
| <i>Synodontis filamentosus</i>   | <i>Synodontis membranaceus</i>     | 0.99                  | Catfish                |
| <i>Synodontis filamentosus</i>   | <i>Synodontis nigrita</i>          | 0.99                  | Catfish                |
| <i>Synodontis filamentosus</i>   | <i>Synodontis schall</i>           | 0.99                  | Catfish                |
| <i>Synodontis membranaceus</i>   | <i>Bunocephalus coracoideus</i>    | 0.99                  | Catfish                |
| <i>Synodontis membranaceus</i>   | <i>Chrysichthys nigrodigitatus</i> | 0.99                  | Catfish                |
| <i>Synodontis membranaceus</i>   | <i>Clarias agboyiensis</i>         | 0.99                  | Catfish                |
| <i>Synodontis membranaceus</i>   | <i>Clarias anguillaris</i>         | 0.99                  | Catfish                |
| <i>Synodontis membranaceus</i>   | <i>Glyptothorax indicus</i>        | 0.99                  | Catfish                |
| <i>Synodontis membranaceus</i>   | <i>Heterobranchus longifilis</i>   | 0.99                  | Catfish                |
| <i>Synodontis membranaceus</i>   | <i>Rineloricaria lima</i>          | 0.99                  | Catfish                |
| <i>Synodontis membranaceus</i>   | <i>Rineloricaria thrissoceps</i>   | 0.99                  | Catfish                |
| <i>Synodontis membranaceus</i>   | <i>Spatuloricaria evansii</i>      | 0.99                  | Catfish                |
| <i>Synodontis membranaceus</i>   | <i>Synodontis filamentosus</i>     | 0.99                  | Catfish                |

S8 Table continued

| 1 <sup>st</sup> Species           | 2 <sup>nd</sup> Species            | Pearson's correlation | Shared common names |
|-----------------------------------|------------------------------------|-----------------------|---------------------|
| <i>Synodontis membranaceus</i>    | <i>Synodontis nigrita</i>          | 0.99                  | Catfish             |
| <i>Synodontis membranaceus</i>    | <i>Synodontis schall</i>           | 0.99                  | Catfish             |
| <i>Synodontis nigrita</i>         | <i>Bunocephalus coracoideus</i>    | 0.99                  | Catfish             |
| <i>Synodontis nigrita</i>         | <i>Chrysichthys nigrodigitatus</i> | 0.99                  | Catfish             |
| <i>Synodontis nigrita</i>         | <i>Clarias agboyiensis</i>         | 0.99                  | Catfish             |
| <i>Synodontis nigrita</i>         | <i>Clarias anguillaris</i>         | 0.99                  | Catfish             |
| <i>Synodontis nigrita</i>         | <i>Glyptothorax indicus</i>        | 0.99                  | Catfish             |
| <i>Synodontis nigrita</i>         | <i>Heterobranchus longifilis</i>   | 0.99                  | Catfish             |
| <i>Synodontis nigrita</i>         | <i>Rineloricaria lima</i>          | 0.99                  | Catfish             |
| <i>Synodontis nigrita</i>         | <i>Rineloricaria thrissoceps</i>   | 0.99                  | Catfish             |
| <i>Synodontis nigrita</i>         | <i>Spatuloricaria evansii</i>      | 0.99                  | Catfish             |
| <i>Synodontis nigrita</i>         | <i>Synodontis filamentosus</i>     | 0.99                  | Catfish             |
| <i>Synodontis nigrita</i>         | <i>Synodontis membranaceus</i>     | 0.99                  | Catfish             |
| <i>Synodontis nigrita</i>         | <i>Synodontis schall</i>           | 0.99                  | Catfish             |
| <i>Synodontis schall</i>          | <i>Bunocephalus coracoideus</i>    | 0.99                  | Catfish             |
| <i>Synodontis schall</i>          | <i>Chrysichthys nigrodigitatus</i> | 0.99                  | Catfish             |
| <i>Synodontis schall</i>          | <i>Clarias agboyiensis</i>         | 0.99                  | Catfish             |
| <i>Synodontis schall</i>          | <i>Clarias anguillaris</i>         | 0.99                  | Catfish             |
| <i>Synodontis schall</i>          | <i>Glyptothorax indicus</i>        | 0.99                  | Catfish             |
| <i>Synodontis schall</i>          | <i>Heterobranchus longifilis</i>   | 0.99                  | Catfish             |
| <i>Synodontis schall</i>          | <i>Rineloricaria lima</i>          | 0.99                  | Catfish             |
| <i>Synodontis schall</i>          | <i>Rineloricaria thrissoceps</i>   | 0.99                  | Catfish             |
| <i>Synodontis schall</i>          | <i>Spatuloricaria evansii</i>      | 0.99                  | Catfish             |
| <i>Synodontis schall</i>          | <i>Synodontis filamentosus</i>     | 0.99                  | Catfish             |
| <i>Synodontis schall</i>          | <i>Synodontis membranaceus</i>     | 0.99                  | Catfish             |
| <i>Synodontis schall</i>          | <i>Synodontis nigrita</i>          | 0.99                  | Catfish             |
| <i>Lutra lutra</i>                | <i>Myocastor coypus</i>            | 0.95                  | Nutria              |
| <i>Anchoa nasus</i>               | <i>Hyporthodus acanthistius</i>    | 0.91                  | Colorado            |
| <i>Huso huso</i>                  | <i>Delphinapterus leucas</i>       | 0.96                  | Beluga              |
| <i>Anampses caeruleopunctatus</i> | <i>Bodianus axillaris</i>          | 0.94                  | Tamarin             |
| <i>Anampses caeruleopunctatus</i> | <i>Bodianus diana</i>              | 0.96                  | Tamarin             |
| <i>Anampses caeruleopunctatus</i> | <i>Halichoeres hortulanus</i>      | 0.95                  | Tamarin             |
| <i>Anampses caeruleopunctatus</i> | <i>Halichoeres scapularis</i>      | 0.93                  | Tamarin             |
| <i>Anampses caeruleopunctatus</i> | <i>Hemigymnus fasciatus</i>        | 0.96                  | Tamarin             |
| <i>Anampses caeruleopunctatus</i> | <i>Hologymnosus annulatus</i>      | 0.97                  | Tamarin             |
| <i>Anampses caeruleopunctatus</i> | <i>Thalassoma hardwicke</i>        | 0.95                  | Tamarin             |
| <i>Anampses caeruleopunctatus</i> | <i>Thalassoma purpureum</i>        | 0.95                  | Tamarin             |
| <i>Anampses caeruleopunctatus</i> | <i>Coris formosa</i>               | 0.95                  | Tamarin             |
| <i>Anampses caeruleopunctatus</i> | <i>Hemigymnus melapterus</i>       | 0.96                  | Tamarin             |
| <i>Bodianus axillaris</i>         | <i>Anampses caeruleopunctatus</i>  | 0.94                  | Tamarin             |
| <i>Bodianus axillaris</i>         | <i>Bodianus diana</i>              | 0.96                  | Tamarin             |
| <i>Bodianus axillaris</i>         | <i>Halichoeres hortulanus</i>      | 0.95                  | Tamarin             |
| <i>Bodianus axillaris</i>         | <i>Halichoeres scapularis</i>      | 0.93                  | Tamarin             |
| <i>Bodianus axillaris</i>         | <i>Hemigymnus fasciatus</i>        | 0.97                  | Tamarin             |
| <i>Bodianus axillaris</i>         | <i>Hologymnosus annulatus</i>      | 0.95                  | Tamarin             |
| <i>Bodianus axillaris</i>         | <i>Thalassoma hardwicke</i>        | 0.95                  | Tamarin             |
| <i>Bodianus axillaris</i>         | <i>Thalassoma purpureum</i>        | 0.93                  | Tamarin             |

S8 Table continued

| 1 <sup>st</sup> Species       | 2 <sup>nd</sup> Species           | Pearson's correlation | Shared common names     |
|-------------------------------|-----------------------------------|-----------------------|-------------------------|
| <i>Bodianus axillaris</i>     | <i>Coris formosa</i>              | 0.95                  | Tamarin                 |
| <i>Bodianus axillaris</i>     | <i>Hemigymnus melapterus</i>      | 0.96                  | Tamarin                 |
| <i>Bodianus diana</i>         | <i>Anampses caeruleopunctatus</i> | 0.96                  | Tamarin                 |
| <i>Bodianus diana</i>         | <i>Bodianus axillaris</i>         | 0.96                  | Tamarin                 |
| <i>Bodianus diana</i>         | <i>Halichoeres hortulanus</i>     | 0.96                  | Tamarin                 |
| <i>Bodianus diana</i>         | <i>Halichoeres scapularis</i>     | 0.93                  | Tamarin                 |
| <i>Bodianus diana</i>         | <i>Hemigymnus fasciatus</i>       | 0.97                  | Tamarin                 |
| <i>Bodianus diana</i>         | <i>Hologymnosus annulatus</i>     | 0.95                  | Tamarin                 |
| <i>Bodianus diana</i>         | <i>Thalassoma hardwicke</i>       | 0.97                  | Tamarin                 |
| <i>Bodianus diana</i>         | <i>Thalassoma purpureum</i>       | 0.95                  | Tamarin                 |
| <i>Bodianus diana</i>         | <i>Coris formosa</i>              | 0.96                  | Tamarin                 |
| <i>Bodianus diana</i>         | <i>Hemigymnus melapterus</i>      | 0.96                  | Tamarin                 |
| <i>Halichoeres hortulanus</i> | <i>Anampses caeruleopunctatus</i> | 0.95                  | Tamarin                 |
| <i>Halichoeres hortulanus</i> | <i>Bodianus axillaris</i>         | 0.95                  | Tamarin                 |
| <i>Halichoeres hortulanus</i> | <i>Bodianus diana</i>             | 0.96                  | Tamarin                 |
| <i>Halichoeres hortulanus</i> | <i>Halichoeres scapularis</i>     | 0.93                  | Tamarin                 |
| <i>Halichoeres hortulanus</i> | <i>Hemigymnus fasciatus</i>       | 0.96                  | Tamarin                 |
| <i>Halichoeres hortulanus</i> | <i>Hologymnosus annulatus</i>     | 0.96                  | Tamarin                 |
| <i>Halichoeres hortulanus</i> | <i>Thalassoma hardwicke</i>       | 0.96                  | Tamarin                 |
| <i>Halichoeres hortulanus</i> | <i>Thalassoma purpureum</i>       | 0.95                  | Tamarin                 |
| <i>Halichoeres hortulanus</i> | <i>Coris formosa</i>              | 0.96                  | Tamarin                 |
| <i>Halichoeres hortulanus</i> | <i>Hemigymnus melapterus</i>      | 0.97                  | Tamarin                 |
| <i>Halichoeres scapularis</i> | <i>Anampses caeruleopunctatus</i> | 0.93                  | Tamarin                 |
| <i>Halichoeres scapularis</i> | <i>Bodianus axillaris</i>         | 0.93                  | Tamarin                 |
| <i>Halichoeres scapularis</i> | <i>Bodianus diana</i>             | 0.93                  | Tamarin                 |
| <i>Halichoeres scapularis</i> | <i>Halichoeres hortulanus</i>     | 0.93                  | Tamarin                 |
| <i>Halichoeres scapularis</i> | <i>Hemigymnus fasciatus</i>       | 0.95                  | Tamarin                 |
| <i>Halichoeres scapularis</i> | <i>Hologymnosus annulatus</i>     | 0.93                  | Tamarin                 |
| <i>Halichoeres scapularis</i> | <i>Thalassoma hardwicke</i>       | 0.95                  | Tamarin                 |
| <i>Halichoeres scapularis</i> | <i>Thalassoma purpureum</i>       | 0.93                  | Tamarin                 |
| <i>Halichoeres scapularis</i> | <i>Coris formosa</i>              | 0.93                  | Tamarin                 |
| <i>Halichoeres scapularis</i> | <i>Hemigymnus melapterus</i>      | 0.95                  | Tamarin                 |
| <i>Hemigymnus fasciatus</i>   | <i>Anampses caeruleopunctatus</i> | 0.96                  | Tamarin                 |
| <i>Hemigymnus fasciatus</i>   | <i>Bodianus axillaris</i>         | 0.97                  | Tamarin                 |
| <i>Hemigymnus fasciatus</i>   | <i>Bodianus diana</i>             | 0.97                  | Tamarin                 |
| <i>Hemigymnus fasciatus</i>   | <i>Halichoeres hortulanus</i>     | 0.96                  | Tamarin                 |
| <i>Hemigymnus fasciatus</i>   | <i>Halichoeres scapularis</i>     | 0.95                  | Tamarin                 |
| <i>Hemigymnus fasciatus</i>   | <i>Hologymnosus annulatus</i>     | 0.96                  | Tamarin                 |
| <i>Hemigymnus fasciatus</i>   | <i>Thalassoma hardwicke</i>       | 0.96                  | Tamarin                 |
| <i>Hemigymnus fasciatus</i>   | <i>Thalassoma purpureum</i>       | 0.96                  | Tamarin                 |
| <i>Hemigymnus fasciatus</i>   | <i>Coris formosa</i>              | 0.96                  | Tamarin                 |
| <i>Hemigymnus fasciatus</i>   | <i>Hemigymnus melapterus</i>      | 0.97                  | Mamselle Adèle, Tamarin |
| <i>Hologymnosus annulatus</i> | <i>Anampses caeruleopunctatus</i> | 0.97                  | Tamarin                 |
| <i>Hologymnosus annulatus</i> | <i>Bodianus axillaris</i>         | 0.95                  | Tamarin                 |
| <i>Hologymnosus annulatus</i> | <i>Bodianus diana</i>             | 0.95                  | Tamarin                 |
| <i>Hologymnosus annulatus</i> | <i>Halichoeres hortulanus</i>     | 0.96                  | Tamarin                 |
| <i>Hologymnosus annulatus</i> | <i>Halichoeres scapularis</i>     | 0.93                  | Tamarin                 |

S8 Table continued

| 1 <sup>st</sup> Species        | 2 <sup>nd</sup> Species           | Pearson's correlation | Shared common names |
|--------------------------------|-----------------------------------|-----------------------|---------------------|
| <i>Hologymnosus annulatus</i>  | <i>Hemigymnus fasciatus</i>       | 0.96                  | Tamarin             |
| <i>Hologymnosus annulatus</i>  | <i>Thalassoma hardwicke</i>       | 0.96                  | Tamarin             |
| <i>Hologymnosus annulatus</i>  | <i>Thalassoma purpureum</i>       | 0.95                  | Tamarin             |
| <i>Hologymnosus annulatus</i>  | <i>Coris formosa</i>              | 0.96                  | Tamarin             |
| <i>Hologymnosus annulatus</i>  | <i>Hemigymnus melapterus</i>      | 0.96                  | Tamarin             |
| <i>Pomacanthus arcuatus</i>    | <i>Holacanthus ciliaris</i>       | 0.94                  | Angelfish, Guinea   |
| <i>Thalassoma hardwicke</i>    | <i>Anampses caeruleopunctatus</i> | 0.95                  | Tamarin             |
| <i>Thalassoma hardwicke</i>    | <i>Bodianus axillaris</i>         | 0.95                  | Tamarin             |
| <i>Thalassoma hardwicke</i>    | <i>Bodianus diana</i>             | 0.97                  | Tamarin             |
| <i>Thalassoma hardwicke</i>    | <i>Halichoeres hortulanus</i>     | 0.96                  | Tamarin             |
| <i>Thalassoma hardwicke</i>    | <i>Halichoeres scapularis</i>     | 0.95                  | Tamarin             |
| <i>Thalassoma hardwicke</i>    | <i>Hemigymnus fasciatus</i>       | 0.96                  | Tamarin             |
| <i>Thalassoma hardwicke</i>    | <i>Hologymnosus annulatus</i>     | 0.96                  | Tamarin             |
| <i>Thalassoma hardwicke</i>    | <i>Thalassoma purpureum</i>       | 0.94                  | Parrotfish, Tamarin |
| <i>Thalassoma hardwicke</i>    | <i>Coris formosa</i>              | 0.96                  | Tamarin             |
| <i>Thalassoma hardwicke</i>    | <i>Hemigymnus melapterus</i>      | 0.97                  | Tamarin             |
| <i>Thalassoma purpureum</i>    | <i>Anampses caeruleopunctatus</i> | 0.95                  | Tamarin             |
| <i>Thalassoma purpureum</i>    | <i>Bodianus axillaris</i>         | 0.93                  | Tamarin             |
| <i>Thalassoma purpureum</i>    | <i>Bodianus diana</i>             | 0.95                  | Tamarin             |
| <i>Thalassoma purpureum</i>    | <i>Halichoeres hortulanus</i>     | 0.95                  | Tamarin             |
| <i>Thalassoma purpureum</i>    | <i>Halichoeres scapularis</i>     | 0.93                  | Tamarin             |
| <i>Thalassoma purpureum</i>    | <i>Hemigymnus fasciatus</i>       | 0.96                  | Tamarin             |
| <i>Thalassoma purpureum</i>    | <i>Hologymnosus annulatus</i>     | 0.95                  | Tamarin             |
| <i>Thalassoma purpureum</i>    | <i>Thalassoma hardwicke</i>       | 0.94                  | Parrotfish, Tamarin |
| <i>Thalassoma purpureum</i>    | <i>Coris formosa</i>              | 0.95                  | Tamarin             |
| <i>Thalassoma purpureum</i>    | <i>Hemigymnus melapterus</i>      | 0.95                  | Tamarin             |
| <i>Sciurus vulgaris</i>        | <i>Tamiasciurus hudsonicus</i>    | 0.95                  | Red Squirrel        |
| <i>Tamiasciurus hudsonicus</i> | <i>Sciurus vulgaris</i>           | 0.95                  | Red Squirrel        |
| <i>Orectolobus hutchinsi</i>   | <i>Orectolobus maculatus</i>      | 1.00                  | Wobbegong           |
| <i>Orectolobus maculatus</i>   | <i>Orectolobus hutchinsi</i>      | 1.00                  | Wobbegong           |
| <i>Orectolobus maculatus</i>   | <i>Cephaloscyllium isabellum</i>  | 0.92                  | Carpet Shark        |
| <i>Orectolobus maculatus</i>   | <i>Orectolobus ornatus</i>        | 0.92                  | Carpet Shark        |
| <i>Orectolobus maculatus</i>   | <i>Orectolobus reticulatus</i>    | 0.92                  | Carpet Shark        |
| <i>Cephalopholis nigri</i>     | <i>Cephalopholis taeniops</i>     | 0.99                  | Merou               |
| <i>Cephalopholis nigri</i>     | <i>Epinephelus goreensis</i>      | 0.99                  | Merou               |
| <i>Cephalopholis nigri</i>     | <i>Epinephelus guttatus</i>       | 0.98                  | Merou               |
| <i>Cephalopholis nigri</i>     | <i>Hyporthodus mystacinus</i>     | 0.99                  | Merou               |
| <i>Cephalopholis taeniops</i>  | <i>Cephalopholis nigri</i>        | 0.99                  | Merou               |
| <i>Cephalopholis taeniops</i>  | <i>Epinephelus goreensis</i>      | 0.98                  | Merou               |
| <i>Cephalopholis taeniops</i>  | <i>Epinephelus guttatus</i>       | 0.98                  | Merou               |
| <i>Cephalopholis taeniops</i>  | <i>Hyporthodus mystacinus</i>     | 0.99                  | Merou               |
| <i>Cephalopholis taeniops</i>  | <i>Epinephelus analogus</i>       | 0.96                  | Spotted Grouper     |
| <i>Cephalopholis taeniops</i>  | <i>Epinephelus areolatus</i>      | 0.93                  | Spotted Grouper     |
| <i>Cephalopholis taeniops</i>  | <i>Hyporthodus niveatus</i>       | 0.91                  | Spotted Grouper     |
| <i>Epinephelus goreensis</i>   | <i>Cephalopholis nigri</i>        | 0.99                  | Merou               |
| <i>Epinephelus goreensis</i>   | <i>Cephalopholis taeniops</i>     | 0.98                  | Merou               |
| <i>Epinephelus goreensis</i>   | <i>Epinephelus guttatus</i>       | 0.97                  | Merou, Mero         |

S8 Table continued

| 1 <sup>st</sup> Species       | 2 <sup>nd</sup> Species          | Pearson's correlation | Shared common names       |
|-------------------------------|----------------------------------|-----------------------|---------------------------|
| <i>Epinephelus goreensis</i>  | <i>Epinephelus itajara</i>       | 0.98                  | Mero                      |
| <i>Epinephelus goreensis</i>  | <i>Hyporthodus mystacinus</i>    | 0.99                  | Merou, Mero               |
| <i>Epinephelus goreensis</i>  | <i>Acanthistius brasilianus</i>  | 0.93                  | Mero                      |
| <i>Epinephelus goreensis</i>  | <i>Alphestes afer</i>            | 0.91                  | Mero                      |
| <i>Epinephelus goreensis</i>  | <i>Epinephelus analogus</i>      | 0.97                  | Grouper, Mero             |
| <i>Epinephelus goreensis</i>  | <i>Hyporthodus flavolimbatus</i> | 0.97                  | Grouper, Mero             |
| <i>Epinephelus goreensis</i>  | <i>Dermatolepis inermis</i>      | 0.93                  | Mero                      |
| <i>Epinephelus goreensis</i>  | <i>Epinephelus areolatus</i>     | 0.94                  | Grouper                   |
| <i>Epinephelus goreensis</i>  | <i>Epinephelus labriformis</i>   | 0.90                  | Grouper                   |
| <i>Epinephelus goreensis</i>  | <i>Epinephelus marginatus</i>    | 0.92                  | Mero                      |
| <i>Epinephelus goreensis</i>  | <i>Epinephelus morrhua</i>       | 0.93                  | Grouper                   |
| <i>Epinephelus goreensis</i>  | <i>Epinephelus tukula</i>        | 0.94                  | Grouper                   |
| <i>Epinephelus goreensis</i>  | <i>Hyporthodus niveatus</i>      | 0.93                  | Mero                      |
| <i>Epinephelus goreensis</i>  | <i>Mycteroperca rubra</i>        | 0.92                  | Mero                      |
| <i>Epinephelus guttatus</i>   | <i>Cephalopholis nigri</i>       | 0.98                  | Merou                     |
| <i>Epinephelus guttatus</i>   | <i>Cephalopholis taeniops</i>    | 0.98                  | Merou                     |
| <i>Epinephelus guttatus</i>   | <i>Epinephelus goreensis</i>     | 0.97                  | Merou, Mero               |
| <i>Epinephelus guttatus</i>   | <i>Epinephelus itajara</i>       | 0.97                  | Mero                      |
| <i>Epinephelus guttatus</i>   | <i>Hyporthodus mystacinus</i>    | 0.98                  | Merou, Mero               |
| <i>Epinephelus guttatus</i>   | <i>Acanthistius brasilianus</i>  | 0.91                  | Mero                      |
| <i>Epinephelus guttatus</i>   | <i>Epinephelus analogus</i>      | 0.95                  | Mero                      |
| <i>Epinephelus guttatus</i>   | <i>Hyporthodus flavolimbatus</i> | 0.96                  | Mero                      |
| <i>Epinephelus guttatus</i>   | <i>Dermatolepis inermis</i>      | 0.91                  | Rockhind, Mero            |
| <i>Epinephelus guttatus</i>   | <i>Hyporthodus niveatus</i>      | 0.91                  | Mero                      |
| <i>Epinephelus itajara</i>    | <i>Epinephelus goreensis</i>     | 0.98                  | Mero                      |
| <i>Epinephelus itajara</i>    | <i>Epinephelus guttatus</i>      | 0.97                  | Mero                      |
| <i>Epinephelus itajara</i>    | <i>Hyporthodus mystacinus</i>    | 0.99                  | Guasa, Cherna, Mero       |
| <i>Epinephelus itajara</i>    | <i>Acanthistius brasilianus</i>  | 0.92                  | Mero                      |
| <i>Epinephelus itajara</i>    | <i>Alphestes afer</i>            | 0.90                  | Cherna, Cherne, Mero      |
| <i>Epinephelus itajara</i>    | <i>Epinephelus analogus</i>      | 0.95                  | Guato, Mero, Mero Pintado |
| <i>Epinephelus itajara</i>    | <i>Hyporthodus flavolimbatus</i> | 0.96                  | Mero                      |
| <i>Epinephelus itajara</i>    | <i>Dermatolepis inermis</i>      | 0.91                  | Mero                      |
| <i>Epinephelus itajara</i>    | <i>Epinephelus marginatus</i>    | 0.90                  | Mero                      |
| <i>Epinephelus itajara</i>    | <i>Hyporthodus niveatus</i>      | 0.92                  | Mero                      |
| <i>Epinephelus itajara</i>    | <i>Mycteroperca rubra</i>        | 0.91                  | Mero                      |
| <i>Hyporthodus mystacinus</i> | <i>Cephalopholis nigri</i>       | 0.99                  | Merou                     |
| <i>Hyporthodus mystacinus</i> | <i>Cephalopholis taeniops</i>    | 0.99                  | Merou                     |
| <i>Hyporthodus mystacinus</i> | <i>Epinephelus goreensis</i>     | 0.99                  | Merou, Mero               |
| <i>Hyporthodus mystacinus</i> | <i>Epinephelus guttatus</i>      | 0.98                  | Merou, Mero               |
| <i>Hyporthodus mystacinus</i> | <i>Epinephelus itajara</i>       | 0.99                  | Cherna, Guasa, Mero       |
| <i>Hyporthodus mystacinus</i> | <i>Acanthistius brasilianus</i>  | 0.91                  | Mero                      |
| <i>Hyporthodus mystacinus</i> | <i>Epinephelus analogus</i>      | 0.96                  | Mero                      |
| <i>Hyporthodus mystacinus</i> | <i>Hyporthodus flavolimbatus</i> | 0.96                  | Mero                      |
| <i>Hyporthodus mystacinus</i> | <i>Dermatolepis inermis</i>      | 0.91                  | Mero                      |
| <i>Hyporthodus mystacinus</i> | <i>Epinephelus marginatus</i>    | 0.90                  | Mero                      |
| <i>Hyporthodus mystacinus</i> | <i>Hyporthodus niveatus</i>      | 0.92                  | Cherna Pintada, Mero      |
| <i>Python molurus</i>         | <i>Python bivittatus</i>         | 0.96                  | Burmese Python            |

S8 Table continued

| 1 <sup>st</sup> Species          | 2 <sup>nd</sup> Species           | Pearson's correlation | Shared common names     |
|----------------------------------|-----------------------------------|-----------------------|-------------------------|
| <i>Python bivittatus</i>         | <i>Python molurus</i>             | 0.96                  | Burmese Python          |
| <i>Pangasianodon gigas</i>       | <i>Pardiglanis tarabinii</i>      | 0.98                  | Giant Catfish           |
| <i>Pardiglanis tarabinii</i>     | <i>Pangasianodon gigas</i>        | 0.98                  | Giant Catfish           |
| <i>Coris formosa</i>             | <i>Anampses caeruleopunctatus</i> | 0.95                  | Tamarin                 |
| <i>Coris formosa</i>             | <i>Bodianus axillaris</i>         | 0.95                  | Tamarin                 |
| <i>Coris formosa</i>             | <i>Bodianus diana</i>             | 0.96                  | Tamarin                 |
| <i>Coris formosa</i>             | <i>Halichoeres hortulanus</i>     | 0.96                  | Tamarin                 |
| <i>Coris formosa</i>             | <i>Halichoeres scapularis</i>     | 0.93                  | Tamarin                 |
| <i>Coris formosa</i>             | <i>Hemigymnus fasciatus</i>       | 0.96                  | Tamarin                 |
| <i>Coris formosa</i>             | <i>Hologymnosus annulatus</i>     | 0.96                  | Tamarin                 |
| <i>Coris formosa</i>             | <i>Thalassoma hardwicke</i>       | 0.96                  | Tamarin                 |
| <i>Coris formosa</i>             | <i>Thalassoma purpureum</i>       | 0.95                  | Tamarin                 |
| <i>Coris formosa</i>             | <i>Hemigymnus melapterus</i>      | 0.95                  | Tamarin                 |
| <i>Hemigymnus melapterus</i>     | <i>Anampses caeruleopunctatus</i> | 0.96                  | Tamarin                 |
| <i>Hemigymnus melapterus</i>     | <i>Bodianus axillaris</i>         | 0.96                  | Tamarin                 |
| <i>Hemigymnus melapterus</i>     | <i>Bodianus diana</i>             | 0.96                  | Tamarin                 |
| <i>Hemigymnus melapterus</i>     | <i>Halichoeres hortulanus</i>     | 0.97                  | Tamarin                 |
| <i>Hemigymnus melapterus</i>     | <i>Halichoeres scapularis</i>     | 0.95                  | Tamarin                 |
| <i>Hemigymnus melapterus</i>     | <i>Hemigymnus fasciatus</i>       | 0.97                  | Mamselle Adèle, Tamarin |
| <i>Hemigymnus melapterus</i>     | <i>Hologymnosus annulatus</i>     | 0.96                  | Tamarin                 |
| <i>Hemigymnus melapterus</i>     | <i>Thalassoma hardwicke</i>       | 0.97                  | Tamarin                 |
| <i>Hemigymnus melapterus</i>     | <i>Thalassoma purpureum</i>       | 0.95                  | Tamarin                 |
| <i>Hemigymnus melapterus</i>     | <i>Coris formosa</i>              | 0.95                  | Tamarin                 |
| <i>Holacanthus ciliaris</i>      | <i>Pomacanthus arcuatus</i>       | 0.94                  | Angelfish, Guinea       |
| <i>Acanthistius brasiliensis</i> | <i>Epinephelus goreensis</i>      | 0.93                  | Mero                    |
| <i>Acanthistius brasiliensis</i> | <i>Epinephelus guttatus</i>       | 0.91                  | Mero                    |
| <i>Acanthistius brasiliensis</i> | <i>Epinephelus itajara</i>        | 0.92                  | Mero                    |
| <i>Acanthistius brasiliensis</i> | <i>Hyporthodus mystacinus</i>     | 0.91                  | Mero                    |
| <i>Acanthistius brasiliensis</i> | <i>Alphestes afer</i>             | 0.94                  | Mero                    |
| <i>Acanthistius brasiliensis</i> | <i>Epinephelus analogus</i>       | 0.96                  | Mero                    |
| <i>Acanthistius brasiliensis</i> | <i>Hyporthodus flavolimbatus</i>  | 0.96                  | Mero                    |
| <i>Acanthistius brasiliensis</i> | <i>Dermatolepis inermis</i>       | 0.94                  | Mero                    |
| <i>Acanthistius brasiliensis</i> | <i>Epinephelus marginatus</i>     | 0.95                  | Mero                    |
| <i>Acanthistius brasiliensis</i> | <i>Hyporthodus niveatus</i>       | 0.96                  | Mero                    |
| <i>Acanthistius brasiliensis</i> | <i>Mycteroperca rubra</i>         | 0.96                  | Mero                    |
| <i>Alphestes afer</i>            | <i>Epinephelus goreensis</i>      | 0.91                  | Mero                    |
| <i>Alphestes afer</i>            | <i>Epinephelus itajara</i>        | 0.90                  | Cherna, Cherne, Mero    |
| <i>Alphestes afer</i>            | <i>Acanthistius brasiliensis</i>  | 0.94                  | Mero                    |
| <i>Alphestes afer</i>            | <i>Epinephelus analogus</i>       | 0.95                  | Mero                    |
| <i>Alphestes afer</i>            | <i>Hyporthodus flavolimbatus</i>  | 0.95                  | Mero                    |
| <i>Alphestes afer</i>            | <i>Dermatolepis inermis</i>       | 0.93                  | Mutton Hamlet, Mero     |
| <i>Alphestes afer</i>            | <i>Epinephelus marginatus</i>     | 0.93                  | Mero                    |
| <i>Alphestes afer</i>            | <i>Hyporthodus niveatus</i>       | 0.95                  | Mero                    |
| <i>Alphestes afer</i>            | <i>Mycteroperca rubra</i>         | 0.93                  | Mero                    |
| <i>Argentina aliciae</i>         | <i>Argentina sialis</i>           | 0.91                  | Argentina               |
| <i>Argentina sialis</i>          | <i>Argentina aliciae</i>          | 0.91                  | Argentina               |
| <i>Bodianus rufus</i>            | <i>Scyliorhinus capensis</i>      | 0.95                  | Dogfish                 |



S8 Table continued

| 1 <sup>st</sup> Species          | 2 <sup>nd</sup> Species           | Pearson's correlation | Shared common names                                                |
|----------------------------------|-----------------------------------|-----------------------|--------------------------------------------------------------------|
| <i>Chaetodon humeralis</i>       | <i>Chaetodon ocellatus</i>        | 0.94                  | Mariposa                                                           |
| <i>Chaetodon humeralis</i>       | <i>Chaetodon striatus</i>         | 0.91                  | Mariposa                                                           |
| <i>Chaetodon humeralis</i>       | <i>Johnrandallia nigrirostris</i> | 0.92                  | Mariposa                                                           |
| <i>Chaetodon humeralis</i>       | <i>Prognathodes aculeatus</i>     | 0.94                  | Mariposa                                                           |
| <i>Chaetodon ocellatus</i>       | <i>Chaetodon humeralis</i>        | 0.94                  | Mariposa                                                           |
| <i>Chaetodon ocellatus</i>       | <i>Chaetodon striatus</i>         | 0.93                  | Butterbun, School Mistress, Mariposa                               |
| <i>Chaetodon ocellatus</i>       | <i>Johnrandallia nigrirostris</i> | 0.94                  | Mariposa                                                           |
| <i>Chaetodon ocellatus</i>       | <i>Prognathodes aculeatus</i>     | 0.93                  | Butterbun, Mariposa                                                |
| <i>Chaetodon striatus</i>        | <i>Chaetodon humeralis</i>        | 0.91                  | Mariposa                                                           |
| <i>Chaetodon striatus</i>        | <i>Chaetodon ocellatus</i>        | 0.93                  | Butterbun, School Mistress, Mariposa                               |
| <i>Chaetodon striatus</i>        | <i>Johnrandallia nigrirostris</i> | 0.94                  | Mariposa                                                           |
| <i>Chaetodon striatus</i>        | <i>Prognathodes aculeatus</i>     | 0.92                  | Butterbun, Mariposa                                                |
| <i>Chimaera cubana</i>           | <i>Prognathodes aculeatus</i>     | 0.90                  | Mariposa                                                           |
| <i>Chimaera monstrosa</i>        | <i>Heterodontus quoyi</i>         | 0.96                  | Gato                                                               |
| <i>Epinephelus analogus</i>      | <i>Cephalopholis taeniops</i>     | 0.96                  | Spotted Grouper                                                    |
| <i>Epinephelus analogus</i>      | <i>Epinephelus goreensis</i>      | 0.97                  | Grouper, Mero                                                      |
| <i>Epinephelus analogus</i>      | <i>Epinephelus guttatus</i>       | 0.95                  | Mero                                                               |
| <i>Epinephelus analogus</i>      | <i>Epinephelus itajara</i>        | 0.95                  | Guato, Mero, Mero Pintado                                          |
| <i>Epinephelus analogus</i>      | <i>Hyporthodus mystacinus</i>     | 0.96                  | Mero                                                               |
| <i>Epinephelus analogus</i>      | <i>Acanthistius brasiliensis</i>  | 0.96                  | Mero                                                               |
| <i>Epinephelus analogus</i>      | <i>Alphestes afer</i>             | 0.95                  | Mero                                                               |
| <i>Epinephelus analogus</i>      | <i>Hyporthodus flavolimbatus</i>  | 0.99                  | Grouper, Mero                                                      |
| <i>Epinephelus analogus</i>      | <i>Dermatolepis inermis</i>       | 0.95                  | Merou Marbre, Mero                                                 |
| <i>Epinephelus analogus</i>      | <i>Epinephelus areolatus</i>      | 0.97                  | Spotted Grouper, Grouper<br>Grouper, Rock Bass, Cabrilla, Cabrilla |
| <i>Epinephelus analogus</i>      | <i>Epinephelus labriformis</i>    | 0.94                  | Pinta                                                              |
| <i>Epinephelus analogus</i>      | <i>Epinephelus marginatus</i>     | 0.94                  | Mero                                                               |
| <i>Epinephelus analogus</i>      | <i>Epinephelus morrhua</i>        | 0.96                  | Grouper                                                            |
| <i>Epinephelus analogus</i>      | <i>Epinephelus tukula</i>         | 0.97                  | Grouper                                                            |
| <i>Epinephelus analogus</i>      | <i>Hyporthodus niveatus</i>       | 0.97                  | Spotted Grouper, Mero                                              |
| <i>Epinephelus analogus</i>      | <i>Mycteroperca rubra</i>         | 0.95                  | Mero                                                               |
| <i>Eptatretus polytrema</i>      | <i>Myxine affinis</i>             | 0.99                  | Anguila Babosa, Babosa                                             |
| <i>Heterodontus quoyi</i>        | <i>Chimaera monstrosa</i>         | 0.96                  | Gato                                                               |
| <i>Hyporthodus flavolimbatus</i> | <i>Epinephelus goreensis</i>      | 0.97                  | Grouper, Mero                                                      |
| <i>Hyporthodus flavolimbatus</i> | <i>Epinephelus guttatus</i>       | 0.96                  | Mero                                                               |
| <i>Hyporthodus flavolimbatus</i> | <i>Epinephelus itajara</i>        | 0.96                  | Mero                                                               |
| <i>Hyporthodus flavolimbatus</i> | <i>Hyporthodus mystacinus</i>     | 0.96                  | Mero                                                               |
| <i>Hyporthodus flavolimbatus</i> | <i>Acanthistius brasiliensis</i>  | 0.96                  | Mero                                                               |
| <i>Hyporthodus flavolimbatus</i> | <i>Alphestes afer</i>             | 0.95                  | Mero                                                               |
| <i>Hyporthodus flavolimbatus</i> | <i>Epinephelus analogus</i>       | 0.99                  | Grouper, Mero                                                      |
| <i>Hyporthodus flavolimbatus</i> | <i>Dermatolepis inermis</i>       | 0.96                  | Mero                                                               |
| <i>Hyporthodus flavolimbatus</i> | <i>Epinephelus areolatus</i>      | 0.97                  | Grouper                                                            |
| <i>Hyporthodus flavolimbatus</i> | <i>Epinephelus labriformis</i>    | 0.92                  | Grouper                                                            |
| <i>Hyporthodus flavolimbatus</i> | <i>Epinephelus marginatus</i>     | 0.95                  | Mero                                                               |
| <i>Hyporthodus flavolimbatus</i> | <i>Epinephelus morrhua</i>        | 0.95                  | Grouper                                                            |
| <i>Hyporthodus flavolimbatus</i> | <i>Epinephelus tukula</i>         | 0.97                  | Grouper                                                            |
| <i>Hyporthodus flavolimbatus</i> | <i>Hyporthodus niveatus</i>       | 0.97                  | Mero                                                               |
| <i>Hyporthodus flavolimbatus</i> | <i>Mycteroperca rubra</i>         | 0.95                  | Mero                                                               |

S8 Table continued

| 1 <sup>st</sup> Species           | 2 <sup>nd</sup> Species           | Pearson's correlation | Shared common names    |
|-----------------------------------|-----------------------------------|-----------------------|------------------------|
| <i>Johnrandallia nigrirostris</i> | <i>Chaetodon humeralis</i>        | 0.92                  | Mariposa               |
| <i>Johnrandallia nigrirostris</i> | <i>Chaetodon ocellatus</i>        | 0.94                  | Mariposa               |
| <i>Johnrandallia nigrirostris</i> | <i>Chaetodon striatus</i>         | 0.94                  | Mariposa               |
| <i>Johnrandallia nigrirostris</i> | <i>Prognathodes aculeatus</i>     | 0.94                  | Mariposa               |
| <i>Mobula mobular</i>             | <i>Mobula thurstoni</i>           | 0.94                  | Manta                  |
| <i>Mobula mobular</i>             | <i>Myliobatis chilensis</i>       | 0.96                  | Manta                  |
| <i>Mobula mobular</i>             | <i>Myliobatis peruvianus</i>      | 0.97                  | Manta                  |
| <i>Mobula thurstoni</i>           | <i>Mobula mobular</i>             | 0.94                  | Manta                  |
| <i>Mobula thurstoni</i>           | <i>Myliobatis chilensis</i>       | 0.93                  | Manta                  |
| <i>Mobula thurstoni</i>           | <i>Myliobatis peruvianus</i>      | 0.93                  | Manta                  |
| <i>Myliobatis chilensis</i>       | <i>Mobula mobular</i>             | 0.96                  | Manta                  |
| <i>Myliobatis chilensis</i>       | <i>Mobula thurstoni</i>           | 0.93                  | Manta                  |
| <i>Myliobatis chilensis</i>       | <i>Myliobatis peruvianus</i>      | 0.96                  | Manta                  |
| <i>Myliobatis peruvianus</i>      | <i>Mobula mobular</i>             | 0.97                  | Manta                  |
| <i>Myliobatis peruvianus</i>      | <i>Mobula thurstoni</i>           | 0.93                  | Manta                  |
| <i>Myliobatis peruvianus</i>      | <i>Myliobatis chilensis</i>       | 0.96                  | Manta                  |
| <i>Myxine affinis</i>             | <i>Eptatretus polytrema</i>       | 0.99                  | Anguila Babosa, Babosa |
| <i>Paralonchurus peruanus</i>     | <i>Paralonchurus rathbuni</i>     | 0.91                  | Coco                   |
| <i>Paralonchurus rathbuni</i>     | <i>Paralonchurus peruanus</i>     | 0.91                  | Coco                   |
| <i>Prognathodes aculeatus</i>     | <i>Chaetodon humeralis</i>        | 0.94                  | Mariposa               |
| <i>Prognathodes aculeatus</i>     | <i>Chaetodon ocellatus</i>        | 0.93                  | Butterbun, Mariposa    |
| <i>Prognathodes aculeatus</i>     | <i>Chaetodon striatus</i>         | 0.92                  | Butterbun, Mariposa    |
| <i>Prognathodes aculeatus</i>     | <i>Chimaera cubana</i>            | 0.90                  | Mariposa               |
| <i>Prognathodes aculeatus</i>     | <i>Johnrandallia nigrirostris</i> | 0.94                  | Mariposa               |
| <i>Scyliorhinus capensis</i>      | <i>Bodianus rufus</i>             | 0.95                  | Dogfish                |
| <i>Stegostoma fasciatum</i>       | <i>Triakis semifasciata</i>       | 0.91                  | Leopard Shark          |
| <i>Triakis semifasciata</i>       | <i>Stegostoma fasciatum</i>       | 0.91                  | Leopard Shark          |
| <i>Ateles geoffroyi</i>           | <i>Cebus macrocephalus</i>        | 0.93                  | Mico                   |
| <i>Cebus macrocephalus</i>        | <i>Ateles geoffroyi</i>           | 0.93                  | Mico                   |
| <i>Bedotia geayi</i>              | <i>Bedotia longianalis</i>        | 0.96                  | Zona                   |
| <i>Bedotia geayi</i>              | <i>Bedotia madagascariensis</i>   | 0.97                  | Zona                   |
| <i>Bedotia geayi</i>              | <i>Rheocles lateralis</i>         | 0.97                  | Zona                   |
| <i>Bedotia geayi</i>              | <i>Rheocles pellegrini</i>        | 0.98                  | Zona                   |
| <i>Bedotia geayi</i>              | <i>Rheocles sikorae</i>           | 0.97                  | Zona                   |
| <i>Bedotia geayi</i>              | <i>Rheocles wrightae</i>          | 0.96                  | Zona                   |
| <i>Bedotia longianalis</i>        | <i>Bedotia geayi</i>              | 0.96                  | Zona                   |
| <i>Bedotia longianalis</i>        | <i>Bedotia madagascariensis</i>   | 0.97                  | Zona                   |
| <i>Bedotia longianalis</i>        | <i>Rheocles lateralis</i>         | 0.97                  | Zona                   |
| <i>Bedotia longianalis</i>        | <i>Rheocles pellegrini</i>        | 0.96                  | Zona                   |
| <i>Bedotia longianalis</i>        | <i>Rheocles sikorae</i>           | 0.96                  | Zona                   |
| <i>Bedotia longianalis</i>        | <i>Rheocles wrightae</i>          | 0.96                  | Zona                   |
| <i>Bedotia madagascariensis</i>   | <i>Bedotia geayi</i>              | 0.97                  | Zona                   |
| <i>Bedotia madagascariensis</i>   | <i>Bedotia longianalis</i>        | 0.97                  | Zona                   |
| <i>Bedotia madagascariensis</i>   | <i>Rheocles lateralis</i>         | 0.97                  | Zona                   |
| <i>Bedotia madagascariensis</i>   | <i>Rheocles pellegrini</i>        | 0.98                  | Zona                   |
| <i>Bedotia madagascariensis</i>   | <i>Rheocles sikorae</i>           | 0.97                  | Zona                   |
| <i>Bedotia madagascariensis</i>   | <i>Rheocles wrightae</i>          | 0.97                  | Zona                   |

S8 Table continued

| 1 <sup>st</sup> Species          | 2 <sup>nd</sup> Species          | Pearson's correlation | Shared common names      |
|----------------------------------|----------------------------------|-----------------------|--------------------------|
| <i>Rheocles lateralis</i>        | <i>Bedotia geayi</i>             | 0.97                  | Zona                     |
| <i>Rheocles lateralis</i>        | <i>Bedotia longianalis</i>       | 0.97                  | Zona                     |
| <i>Rheocles lateralis</i>        | <i>Bedotia madagascariensis</i>  | 0.97                  | Zona                     |
| <i>Rheocles lateralis</i>        | <i>Rheocles pellegrini</i>       | 0.97                  | Zona                     |
| <i>Rheocles lateralis</i>        | <i>Rheocles sikorae</i>          | 0.97                  | Zona                     |
| <i>Rheocles lateralis</i>        | <i>Rheocles wrightae</i>         | 0.97                  | Zona                     |
| <i>Rheocles pellegrini</i>       | <i>Bedotia geayi</i>             | 0.98                  | Zona                     |
| <i>Rheocles pellegrini</i>       | <i>Bedotia longianalis</i>       | 0.96                  | Zona                     |
| <i>Rheocles pellegrini</i>       | <i>Bedotia madagascariensis</i>  | 0.98                  | Zona                     |
| <i>Rheocles pellegrini</i>       | <i>Rheocles lateralis</i>        | 0.97                  | Zona                     |
| <i>Rheocles pellegrini</i>       | <i>Rheocles sikorae</i>          | 0.97                  | Zona                     |
| <i>Rheocles pellegrini</i>       | <i>Rheocles wrightae</i>         | 0.97                  | Zona                     |
| <i>Rheocles sikorae</i>          | <i>Bedotia geayi</i>             | 0.97                  | Zona                     |
| <i>Rheocles sikorae</i>          | <i>Bedotia longianalis</i>       | 0.96                  | Zona                     |
| <i>Rheocles sikorae</i>          | <i>Bedotia madagascariensis</i>  | 0.97                  | Zona                     |
| <i>Rheocles sikorae</i>          | <i>Rheocles lateralis</i>        | 0.97                  | Zona                     |
| <i>Rheocles sikorae</i>          | <i>Rheocles pellegrini</i>       | 0.97                  | Zona                     |
| <i>Rheocles sikorae</i>          | <i>Rheocles wrightae</i>         | 0.97                  | Zona                     |
| <i>Rheocles wrightae</i>         | <i>Bedotia geayi</i>             | 0.96                  | Zona                     |
| <i>Rheocles wrightae</i>         | <i>Bedotia longianalis</i>       | 0.96                  | Zona                     |
| <i>Rheocles wrightae</i>         | <i>Bedotia madagascariensis</i>  | 0.97                  | Zona                     |
| <i>Rheocles wrightae</i>         | <i>Rheocles lateralis</i>        | 0.97                  | Zona                     |
| <i>Rheocles wrightae</i>         | <i>Rheocles pellegrini</i>       | 0.97                  | Zona                     |
| <i>Rheocles wrightae</i>         | <i>Rheocles sikorae</i>          | 0.97                  | Zona                     |
| <i>Ambystoma bombypellum</i>     | <i>Ambystoma mexicanum</i>       | 0.93                  | Axolotl                  |
| <i>Hyporthodus acanthistius</i>  | <i>Anchoa nasus</i>              | 0.91                  | Colorado                 |
| <i>Cephaloscyllium isabellum</i> | <i>Orectolobus maculatus</i>     | 0.92                  | Carpet Shark             |
| <i>Cephaloscyllium isabellum</i> | <i>Orectolobus ornatus</i>       | 0.96                  | Carpet Shark             |
| <i>Cephaloscyllium isabellum</i> | <i>Orectolobus reticulatus</i>   | 0.98                  | Carpet Shark             |
| <i>Dermatolepis inermis</i>      | <i>Epinephelus gorensis</i>      | 0.93                  | Mero                     |
| <i>Dermatolepis inermis</i>      | <i>Epinephelus guttatus</i>      | 0.91                  | Rockhind, Mero           |
| <i>Dermatolepis inermis</i>      | <i>Epinephelus itajara</i>       | 0.91                  | Mero                     |
| <i>Dermatolepis inermis</i>      | <i>Hyporthodus mystacinus</i>    | 0.91                  | Mero                     |
| <i>Dermatolepis inermis</i>      | <i>Acanthistius brasilianus</i>  | 0.94                  | Mero                     |
| <i>Dermatolepis inermis</i>      | <i>Alphestes afer</i>            | 0.93                  | Mutton Hamlet, Mero      |
| <i>Dermatolepis inermis</i>      | <i>Epinephelus analogus</i>      | 0.95                  | Merou Marbre, Mero       |
| <i>Dermatolepis inermis</i>      | <i>Hyporthodus flavolimbatus</i> | 0.96                  | Mero                     |
| <i>Dermatolepis inermis</i>      | <i>Epinephelus marginatus</i>    | 0.96                  | Mero                     |
| <i>Dermatolepis inermis</i>      | <i>Hyporthodus niveatus</i>      | 0.97                  | Mero                     |
| <i>Dermatolepis inermis</i>      | <i>Mycteroperca rubra</i>        | 0.95                  | Mero                     |
| <i>Epinephelus areolatus</i>     | <i>Cephalopholis taeniops</i>    | 0.93                  | Spotted Grouper          |
| <i>Epinephelus areolatus</i>     | <i>Epinephelus gorensis</i>      | 0.94                  | Grouper                  |
| <i>Epinephelus areolatus</i>     | <i>Epinephelus analogus</i>      | 0.97                  | Grouper, Spotted Grouper |
| <i>Epinephelus areolatus</i>     | <i>Hyporthodus flavolimbatus</i> | 0.97                  | Grouper                  |
| <i>Epinephelus areolatus</i>     | <i>Epinephelus labriformis</i>   | 0.94                  | Grouper                  |
| <i>Epinephelus areolatus</i>     | <i>Epinephelus morrhua</i>       | 0.97                  | Grouper                  |
| <i>Epinephelus areolatus</i>     | <i>Epinephelus tukula</i>        | 0.98                  | Grouper                  |

S8 Table continued

| 1 <sup>st</sup> Species        | 2 <sup>nd</sup> Species          | Pearson's correlation | Shared common names                               |
|--------------------------------|----------------------------------|-----------------------|---------------------------------------------------|
| <i>Epinephelus areolatus</i>   | <i>Hyporthodus niveatus</i>      | 0.94                  | Spotted Grouper                                   |
| <i>Epinephelus labriformis</i> | <i>Epinephelus goreensis</i>     | 0.90                  | Grouper<br>Rock Bass, Grouper, Cabrilla, Cabrilla |
| <i>Epinephelus labriformis</i> | <i>Epinephelus analogus</i>      | 0.94                  | Pinta                                             |
| <i>Epinephelus labriformis</i> | <i>Hyporthodus flavolimbatus</i> | 0.92                  | Grouper                                           |
| <i>Epinephelus labriformis</i> | <i>Epinephelus areolatus</i>     | 0.94                  | Grouper                                           |
| <i>Epinephelus labriformis</i> | <i>Epinephelus morrhua</i>       | 0.93                  | Grouper                                           |
| <i>Epinephelus labriformis</i> | <i>Epinephelus tukula</i>        | 0.96                  | Grouper                                           |
| <i>Epinephelus marginatus</i>  | <i>Epinephelus goreensis</i>     | 0.92                  | Mero                                              |
| <i>Epinephelus marginatus</i>  | <i>Epinephelus itajara</i>       | 0.90                  | Mero                                              |
| <i>Epinephelus marginatus</i>  | <i>Hyporthodus mystacinus</i>    | 0.90                  | Mero                                              |
| <i>Epinephelus marginatus</i>  | <i>Acanthistius brasiliensis</i> | 0.95                  | Mero                                              |
| <i>Epinephelus marginatus</i>  | <i>Alphesthes afer</i>           | 0.93                  | Mero                                              |
| <i>Epinephelus marginatus</i>  | <i>Epinephelus analogus</i>      | 0.94                  | Mero                                              |
| <i>Epinephelus marginatus</i>  | <i>Hyporthodus flavolimbatus</i> | 0.95                  | Mero                                              |
| <i>Epinephelus marginatus</i>  | <i>Dermatolepis inermis</i>      | 0.96                  | Mero                                              |
| <i>Epinephelus marginatus</i>  | <i>Hyporthodus niveatus</i>      | 0.96                  | Mero                                              |
| <i>Epinephelus marginatus</i>  | <i>Mycteroperca rubra</i>        | 0.94                  | Mero                                              |
| <i>Epinephelus morrhua</i>     | <i>Epinephelus goreensis</i>     | 0.93                  | Grouper                                           |
| <i>Epinephelus morrhua</i>     | <i>Epinephelus analogus</i>      | 0.96                  | Grouper                                           |
| <i>Epinephelus morrhua</i>     | <i>Hyporthodus flavolimbatus</i> | 0.95                  | Grouper                                           |
| <i>Epinephelus morrhua</i>     | <i>Epinephelus areolatus</i>     | 0.97                  | Grouper                                           |
| <i>Epinephelus morrhua</i>     | <i>Epinephelus labriformis</i>   | 0.93                  | Grouper                                           |
| <i>Epinephelus morrhua</i>     | <i>Epinephelus tukula</i>        | 0.97                  | Grouper                                           |
| <i>Epinephelus tukula</i>      | <i>Epinephelus goreensis</i>     | 0.94                  | Grouper                                           |
| <i>Epinephelus tukula</i>      | <i>Epinephelus analogus</i>      | 0.97                  | Grouper                                           |
| <i>Epinephelus tukula</i>      | <i>Hyporthodus flavolimbatus</i> | 0.97                  | Grouper                                           |
| <i>Epinephelus tukula</i>      | <i>Epinephelus areolatus</i>     | 0.98                  | Grouper                                           |
| <i>Epinephelus tukula</i>      | <i>Epinephelus labriformis</i>   | 0.96                  | Grouper                                           |
| <i>Epinephelus tukula</i>      | <i>Epinephelus morrhua</i>       | 0.97                  | Grouper                                           |
| <i>Hyporthodus niveatus</i>    | <i>Cephalopholis taeniops</i>    | 0.91                  | Spotted Grouper                                   |
| <i>Hyporthodus niveatus</i>    | <i>Epinephelus goreensis</i>     | 0.93                  | Mero                                              |
| <i>Hyporthodus niveatus</i>    | <i>Epinephelus guttatus</i>      | 0.91                  | Mero                                              |
| <i>Hyporthodus niveatus</i>    | <i>Epinephelus itajara</i>       | 0.92                  | Mero                                              |
| <i>Hyporthodus niveatus</i>    | <i>Hyporthodus mystacinus</i>    | 0.92                  | Cherna Pintada, Mero                              |
| <i>Hyporthodus niveatus</i>    | <i>Acanthistius brasiliensis</i> | 0.96                  | Mero                                              |
| <i>Hyporthodus niveatus</i>    | <i>Alphesthes afer</i>           | 0.95                  | Mero                                              |
| <i>Hyporthodus niveatus</i>    | <i>Epinephelus analogus</i>      | 0.97                  | Spotted Grouper, Mero                             |
| <i>Hyporthodus niveatus</i>    | <i>Hyporthodus flavolimbatus</i> | 0.97                  | Mero                                              |
| <i>Hyporthodus niveatus</i>    | <i>Dermatolepis inermis</i>      | 0.97                  | Mero                                              |
| <i>Hyporthodus niveatus</i>    | <i>Epinephelus areolatus</i>     | 0.94                  | Spotted Grouper                                   |
| <i>Hyporthodus niveatus</i>    | <i>Epinephelus marginatus</i>    | 0.96                  | Mero                                              |
| <i>Hyporthodus niveatus</i>    | <i>Mycteroperca rubra</i>        | 0.96                  | Mero                                              |
| <i>Mycteroperca rubra</i>      | <i>Epinephelus goreensis</i>     | 0.92                  | Mero                                              |
| <i>Mycteroperca rubra</i>      | <i>Epinephelus itajara</i>       | 0.91                  | Mero                                              |
| <i>Mycteroperca rubra</i>      | <i>Acanthistius brasiliensis</i> | 0.96                  | Mero                                              |
| <i>Mycteroperca rubra</i>      | <i>Alphesthes afer</i>           | 0.93                  | Mero                                              |
| <i>Mycteroperca rubra</i>      | <i>Epinephelus analogus</i>      | 0.95                  | Mero                                              |

S8 Table continued

| 1 <sup>st</sup> Species        | 2 <sup>nd</sup> Species          | Pearson's correlation | Shared common names        |
|--------------------------------|----------------------------------|-----------------------|----------------------------|
| <i>Mycteroperca rubra</i>      | <i>Hyporthodus flavolimbatus</i> | 0.95                  | Mero                       |
| <i>Mycteroperca rubra</i>      | <i>Dermatolepis inermis</i>      | 0.95                  | Mero                       |
| <i>Mycteroperca rubra</i>      | <i>Epinephelus marginatus</i>    | 0.94                  | Mero                       |
| <i>Mycteroperca rubra</i>      | <i>Hyporthodus niveatus</i>      | 0.96                  | Mero                       |
| <i>Orectolobus ornatus</i>     | <i>Orectolobus maculatus</i>     | 0.92                  | Carpet Shark               |
| <i>Orectolobus ornatus</i>     | <i>Cephaloscyllium isabellum</i> | 0.96                  | Carpet Shark               |
| <i>Orectolobus ornatus</i>     | <i>Orectolobus reticulatus</i>   | 0.97                  | Carpet Shark               |
| <i>Orectolobus reticulatus</i> | <i>Orectolobus maculatus</i>     | 0.92                  | Carpet Shark               |
| <i>Orectolobus reticulatus</i> | <i>Cephaloscyllium isabellum</i> | 0.98                  | Carpet Shark               |
| <i>Orectolobus reticulatus</i> | <i>Orectolobus ornatus</i>       | 0.97                  | Carpet Shark               |
| <i>Ateles belzebuth</i>        | <i>Ateles chamek</i>             | 0.95                  | Macaco Aranha, Maquisapa   |
| <i>Ateles belzebuth</i>        | <i>Ateles marginatus</i>         | 0.91                  | Macaco Aranha              |
| <i>Ateles chamek</i>           | <i>Ateles belzebuth</i>          | 0.95                  | Macaco Aranha, Maquisapa   |
| <i>Ateles chamek</i>           | <i>Ateles marginatus</i>         | 0.94                  | Macaco Aranha              |
| <i>Ateles marginatus</i>       | <i>Ateles belzebuth</i>          | 0.91                  | Macaco Aranha              |
| <i>Ateles marginatus</i>       | <i>Ateles chamek</i>             | 0.94                  | Macaco Aranha              |
| <i>Callicebus caligatus</i>    | <i>Callicebus cinerascens</i>    | 0.98                  | Titi Monkey                |
| <i>Callicebus caligatus</i>    | <i>Callicebus discolor</i>       | 0.98                  | Titi Monkey                |
| <i>Callicebus caligatus</i>    | <i>Callicebus donacophilus</i>   | 0.98                  | Titi Monkey                |
| <i>Callicebus caligatus</i>    | <i>Callicebus modestus</i>       | 0.98                  | Titi Monkey                |
| <i>Callicebus caligatus</i>    | <i>Callicebus moloch</i>         | 0.98                  | Titi Monkey                |
| <i>Callicebus caligatus</i>    | <i>Callicebus pallescens</i>     | 0.96                  | Titi Monkey                |
| <i>Callicebus cinerascens</i>  | <i>Callicebus caligatus</i>      | 0.98                  | Titi Monkey                |
| <i>Callicebus cinerascens</i>  | <i>Callicebus discolor</i>       | 0.98                  | Titi Monkey                |
| <i>Callicebus cinerascens</i>  | <i>Callicebus donacophilus</i>   | 0.98                  | Titi Monkey                |
| <i>Callicebus cinerascens</i>  | <i>Callicebus modestus</i>       | 0.97                  | Titi Monkey                |
| <i>Callicebus cinerascens</i>  | <i>Callicebus moloch</i>         | 0.98                  | Titi Monkey                |
| <i>Callicebus cinerascens</i>  | <i>Callicebus pallescens</i>     | 0.97                  | Titi Monkey, Zogue-zogue   |
| <i>Callicebus discolor</i>     | <i>Callicebus caligatus</i>      | 0.98                  | Titi Monkey                |
| <i>Callicebus discolor</i>     | <i>Callicebus cinerascens</i>    | 0.98                  | Titi Monkey                |
| <i>Callicebus discolor</i>     | <i>Callicebus donacophilus</i>   | 0.97                  | Titi Monkey                |
| <i>Callicebus discolor</i>     | <i>Callicebus modestus</i>       | 0.99                  | Titi Monkey                |
| <i>Callicebus discolor</i>     | <i>Callicebus moloch</i>         | 0.98                  | Titi Monkey                |
| <i>Callicebus discolor</i>     | <i>Callicebus pallescens</i>     | 0.98                  | Titi Monkey                |
| <i>Callicebus donacophilus</i> | <i>Callicebus caligatus</i>      | 0.98                  | Titi Monkey                |
| <i>Callicebus donacophilus</i> | <i>Callicebus cinerascens</i>    | 0.98                  | Titi Monkey                |
| <i>Callicebus donacophilus</i> | <i>Callicebus discolor</i>       | 0.97                  | Titi Monkey                |
| <i>Callicebus donacophilus</i> | <i>Callicebus modestus</i>       | 0.98                  | Titi Monkey, Bolivian Titi |
| <i>Callicebus donacophilus</i> | <i>Callicebus moloch</i>         | 0.98                  | Titi Monkey                |
| <i>Callicebus donacophilus</i> | <i>Callicebus pallescens</i>     | 0.98                  | Titi Monkey                |
| <i>Callicebus modestus</i>     | <i>Callicebus caligatus</i>      | 0.98                  | Titi Monkey                |
| <i>Callicebus modestus</i>     | <i>Callicebus cinerascens</i>    | 0.97                  | Titi Monkey                |
| <i>Callicebus modestus</i>     | <i>Callicebus discolor</i>       | 0.99                  | Titi Monkey                |
| <i>Callicebus modestus</i>     | <i>Callicebus donacophilus</i>   | 0.98                  | Bolivian Titi, Titi Monkey |
| <i>Callicebus modestus</i>     | <i>Callicebus moloch</i>         | 0.98                  | Titi Monkey                |
| <i>Callicebus modestus</i>     | <i>Callicebus pallescens</i>     | 0.98                  | Titi Monkey, Mono Titi     |
| <i>Callicebus moloch</i>       | <i>Callicebus caligatus</i>      | 0.98                  | Titi Monkey                |

S8 Table continued

| 1 <sup>st</sup> Species         | 2 <sup>nd</sup> Species         | Pearson's correlation | Shared common names        |
|---------------------------------|---------------------------------|-----------------------|----------------------------|
| <i>Callicebus moloch</i>        | <i>Callicebus cinerascens</i>   | 0.98                  | Titi Monkey                |
| <i>Callicebus moloch</i>        | <i>Callicebus discolor</i>      | 0.98                  | Titi Monkey                |
| <i>Callicebus moloch</i>        | <i>Callicebus donacophilus</i>  | 0.98                  | Titi Monkey                |
| <i>Callicebus moloch</i>        | <i>Callicebus modestus</i>      | 0.98                  | Titi Monkey                |
| <i>Callicebus moloch</i>        | <i>Callicebus pallescens</i>    | 0.98                  | Titi Monkey                |
| <i>Callicebus pallescens</i>    | <i>Callicebus caligatus</i>     | 0.96                  | Titi Monkey                |
| <i>Callicebus pallescens</i>    | <i>Callicebus cinerascens</i>   | 0.97                  | Titi Monkey, Zogue-zogue   |
| <i>Callicebus pallescens</i>    | <i>Callicebus discolor</i>      | 0.98                  | Titi Monkey                |
| <i>Callicebus pallescens</i>    | <i>Callicebus donacophilus</i>  | 0.98                  | Titi Monkey                |
| <i>Callicebus pallescens</i>    | <i>Callicebus modestus</i>      | 0.98                  | Titi Monkey, Mono Titi     |
| <i>Callicebus pallescens</i>    | <i>Callicebus moloch</i>        | 0.98                  | Titi Monkey                |
| <i>Ambystoma mexicanum</i>      | <i>Ambystoma bombypellum</i>    | 0.93                  | Axolotl, Ajolote           |
| <i>Genicanthus semicinctus</i>  | <i>Pomacanthus paru</i>         | 0.91                  | Angelfish                  |
| <i>Rhinobatos rhinobatos</i>    | <i>Rhynchobatus luebberti</i>   | 0.92                  | Guitarra                   |
| <i>Rhynchobatus luebberti</i>   | <i>Rhinobatos rhinobatos</i>    | 0.92                  | Guitarra                   |
| <i>Saguinus fuscicollis</i>     | <i>Saguinus nigricollis</i>     | 0.97                  | Leoncito                   |
| <i>Saguinus nigricollis</i>     | <i>Saguinus fuscicollis</i>     | 0.97                  | Leoncito                   |
| <i>Distocyclus conirostris</i>  | <i>Steatogenys elegans</i>      | 0.96                  | Anguila                    |
| <i>Ambystoma maculatum</i>      | <i>Hynobius naevius</i>         | 0.91                  | Spotted Salamander         |
| <i>Hynobius naevius</i>         | <i>Ambystoma maculatum</i>      | 0.91                  | Spotted Salamander         |
| <i>Limnodynastes dorsalis</i>   | <i>Limnodynastes dumerilii</i>  | 0.92                  | Banjo Frog, Pobblebonk     |
| <i>Bodianus insularis</i>       | <i>Thalassoma amblycephalum</i> | 0.97                  | Parrotfish                 |
| <i>Bodianus insularis</i>       | <i>Thalassoma pavo</i>          | 0.95                  | Parrotfish                 |
| <i>Centropomus armatus</i>      | <i>Orthopristis chalceus</i>    | 0.92                  | Corcovado                  |
| <i>Opisthonema medirastre</i>   | <i>Hemibrycon carrilloi</i>     | 0.95                  | Sardina                    |
| <i>Opisthonema medirastre</i>   | <i>Leporinus granti</i>         | 0.96                  | Sardina                    |
| <i>Opisthonema medirastre</i>   | <i>Lile piquitinga</i>          | 0.91                  | Sardina                    |
| <i>Opisthonema medirastre</i>   | <i>Atherinella argentea</i>     | 0.95                  | Sardina                    |
| <i>Orthopristis chalceus</i>    | <i>Centropomus armatus</i>      | 0.92                  | Corcovado                  |
| <i>Paralabrax callaensis</i>    | <i>Paralabrax humeralis</i>     | 0.94                  | Sea bass, Cabrilla, Perela |
|                                 | <i>Paralabrax</i>               |                       |                            |
| <i>Paralabrax clathratus</i>    | <i>maculatofasciatus</i>        | 0.91                  | Sea bass                   |
| <i>Paralabrax humeralis</i>     | <i>Paralabrax callaensis</i>    | 0.94                  | Sea bass, Cabrilla, Perela |
| <i>Paralabrax</i>               |                                 |                       |                            |
| <i>maculatofasciatus</i>        | <i>Paralabrax clathratus</i>    | 0.91                  | Sea bass                   |
| <i>Pomacanthus paru</i>         | <i>Genicanthus semicinctus</i>  | 0.91                  | Angelfish                  |
| <i>Thalassoma amblycephalum</i> | <i>Bodianus insularis</i>       | 0.97                  | Parrotfish                 |
| <i>Thalassoma amblycephalum</i> | <i>Thalassoma pavo</i>          | 0.96                  | Parrotfish                 |
| <i>Thalassoma lutescens</i>     | <i>Cyphomyrus discorhynchus</i> | 0.94                  | Parrotfish                 |
| <i>Thalassoma pavo</i>          | <i>Bodianus insularis</i>       | 0.95                  | Parrotfish                 |
| <i>Thalassoma pavo</i>          | <i>Thalassoma amblycephalum</i> | 0.96                  | Parrotfish                 |
| <i>Aquila verreauxii</i>        | <i>Ictinaetus malayensis</i>    | 0.90                  | Black Eagle                |
| <i>Ictinaetus malayensis</i>    | <i>Aquila verreauxii</i>        | 0.90                  | Black Eagle                |
| <i>Cyphomyrus discorhynchus</i> | <i>Thalassoma lutescens</i>     | 0.94                  | Parrotfish                 |
| <i>Hemibrycon carrilloi</i>     | <i>Opisthonema medirastre</i>   | 0.95                  | Sardina                    |
| <i>Hemibrycon carrilloi</i>     | <i>Leporinus granti</i>         | 0.93                  | Sardina                    |
| <i>Leporinus granti</i>         | <i>Opisthonema medirastre</i>   | 0.96                  | Sardina                    |
| <i>Leporinus granti</i>         | <i>Hemibrycon carrilloi</i>     | 0.93                  | Sardina                    |
| <i>Leporinus granti</i>         | <i>Atherinella argentea</i>     | 0.93                  | Sardina                    |
| <i>Steatogenys elegans</i>      | <i>Distocyclus conirostris</i>  | 0.96                  | Anguila                    |
| <i>Lile piquitinga</i>          | <i>Opisthonema medirastre</i>   | 0.91                  | Sardina                    |
| <i>Limnodynastes dumerilii</i>  | <i>Limnodynastes dorsalis</i>   | 0.92                  | Banjo Frog, Pobblebonk     |
| <i>Atherinella argentea</i>     | <i>Opisthonema medirastre</i>   | 0.95                  | Sardina                    |
| <i>Atherinella argentea</i>     | <i>Leporinus granti</i>         | 0.93                  | Sardina                    |
