# Supplementary material for: Popular interest in vertebrates does not reflect extinction risk and is associated with bias in conservation investment
Source: PubMed Central journal article supplement (PMC6157853; doi:10.1371/journal.pone.0203694), 2018-09-26
Supplement: pone.0203694.s010.pdf [file pone.0203694.s010.pdf]

**S9 Table. Raw data used in the international aid data analysis (Fig 4).** The amount of financial capital given in international aid to the conservation of critically endangered and endangered vertebrate species with high internet search interest. Data were downloaded from the Aid data database ([www.aiddata.org](http://www.aiddata.org)) on 08/09/2016. See methods for details of data collection.

| Species                             | Common name                       | Average monthly web search interest | Aid data (USD) |
|-------------------------------------|-----------------------------------|-------------------------------------|----------------|
| <i>Acerodon jubatus</i>             | Golden-capped Fruit Bat           | 32.72                               | 0              |
| <i>Achondrostoma salmantinum</i>    | Sarda                             | 15.15                               | 0              |
| <i>Addax nasomaculatus</i>          | Addax                             | 50.92                               | 16044          |
| <i>Ailuropoda melanoleuca</i>       | Giant Panda                       | 8681.54                             | 2400000        |
| <i>Alligator sinensis</i>           | Chinese Alligator                 | 21.85                               | 0              |
| <i>Andrias davidianus</i>           | Chinese Giant Salamander          | 27.19                               | 16044          |
| <i>Anodorhynchus hyacinthinus</i>   | Hyacinth Macaw                    | 8.99                                | 0              |
| <i>Ardeotis nigriceps</i>           | Great Indian Bustard              | 22.85                               | 5879           |
| <i>Aspidites ramsayi</i>            | Ramsay's Python                   | 11.65                               | 0              |
| <i>Ateles hybridus</i>              | Variegated Spider Monkey          | 28.63                               | 86516          |
| <i>Atelopus varius</i>              | Harlequin Frog                    | 9.59                                | 46802          |
| <i>Atelopus zeteki</i>              | Golden Arrow Poison Frog          | 21.85                               | 0              |
| <i>Axis porcinus</i>                | Hog Deer                          | 26.38                               | 0              |
| <i>Babyrousa togeanensis</i>        | Togian Islands Babirusa           | 21.17                               | 0              |
| <i>Balaenoptera borealis</i>        | Sei Whale                         | 43.49                               | 0              |
| <i>Balaenoptera musculus</i>        | Blue Whale                        | 1526.06                             | 15393          |
| <i>Balaenoptera physalus</i>        | Fin Whale                         | 145.10                              | 0              |
| <i>Balantiocheilos melanopterus</i> | Silver Shark                      | 15.20                               | 0              |
| <i>Beatragus hunteri</i>            | Hirola                            | 14.91                               | 56096          |
| <i>Bettongia penicillata</i>        | Woylie                            | 20.45                               | 0              |
| <i>Bos javanicus</i>                | Banteng                           | 24.56                               | 36569          |
| <i>Bos sauveli</i>                  | Kouprey                           | 14.30                               | 307321         |
| <i>Bothropoides insularis</i>       | Golden Lancehead                  | 16.53                               | 0              |
| <i>Brachyramphus marmoratus</i>     | Marbled Murrelet                  | 12.92                               | 0              |
| <i>Brachyteles arachnoides</i>      | Muriqui                           | 23.51                               | 0              |
| <i>Brachyteles hypoxanthus</i>      | Northern Muriqui                  | 24.59                               | 21393          |
| <i>Bubalus arnee</i>                | Asian Buffalo                     | 397.11                              | 2380           |
| <i>Bubalus depressicornis</i>       | Anoa                              | 25.57                               | 25771          |
| <i>Burramys parvus</i>              | Mountain Pygmy Possum             | 30.17                               | 0              |
| <i>Cacatua alba</i>                 | White Cockatoo                    | 10.84                               | 0              |
| <i>Callaeas cinereus</i>            | Kokako                            | 15.48                               | 0              |
| <i>Camelus ferus</i>                | Bactrian Camel                    | 70.74                               | 10696          |
| <i>Campephilus imperialis</i>       | Imperial Woodpecker               | 14.54                               | 0              |
| <i>Campephilus principalis</i>      | Ivory-billed Woodpecker           | 1421.69                             | 0              |
| <i>Canis rufus</i>                  | Red Wolf                          | 423.38                              | 0              |
| <i>Canis simensis</i>               | Ethiopian Wolf                    | 37.93                               | 0              |
| <i>Capra falconeri</i>              | Markhor                           | 22.56                               | 35142          |
| <i>Capra walie</i>                  | Walia Ibex                        | 11.53                               | 11044          |
| <i>Carduelis cucullata</i>          | Red Siskin                        | 8.90                                | 0              |
| <i>Caretta caretta</i>              | Loggerhead                        | 155.36                              | 835462         |
| <i>Cheilinus undulatus</i>          | Giant Wrasse                      | 38.47                               | 1040           |
| <i>Chelonia mydas</i>               | Green Turtle                      | 147.73                              | 308898         |
| <i>Chinchilla lanigera</i>          | Chinchilla                        | 38.00                               | 0              |
| <i>Choeropsis liberiensis</i>       | Pygmy Hippopotamus                | 30.33                               | 73892          |
| <i>Conraua goliath</i>              | Giant Slippery Frog               | 37.33                               | 0              |
| <i>Crocodylus intermedius</i>       | Orinoco Crocodile                 | 10.10                               | 0              |
| <i>Crocodylus rhombifer</i>         | Cuban Crocodile                   | 15.41                               | 0              |
| <i>Ctenosaura flavidorsalis</i>     | Yellow-backed Spiny-tailed Iguana | 11.51                               | 0              |
| <i>Cuon alpinus</i>                 | Dhole                             | 69.02                               | 5131           |

S9 Table continued

| Species                            | Common name                | Average monthly web search interest | Aid data (USD) |
|------------------------------------|----------------------------|-------------------------------------|----------------|
| <i>Cynomys mexicanus</i>           | Mexican Prairie Dog        | 17.88                               | 0              |
| <i>Dasyurus hallucatus</i>         | Northern Quoll             | 13.46                               | 0              |
| <i>Dicerorhinus sumatrensis</i>    | Sumatran Rhinoceros        | 21.21                               | 625104         |
| <i>Diceros bicornis</i>            | Black Rhinoceros           | 99.38                               | 1200000        |
| <i>Dipturus batis</i>              | Blue Skate                 | 19.29                               | 0              |
| <i>Elephas maximus</i>             | Asian Elephant             | 417.48                              | 12300000       |
| <i>Enhydra lutris</i>              | Sea Otter                  | 395.91                              | 0              |
| <i>Equus africanus</i>             | African Wild Ass           | 248.02                              | 4800000        |
| <i>Equus hemionus</i>              | Asiatic Wild Ass           | 16.63                               | 0              |
| <i>Eretmochelys imbricata</i>      | Hawksbill Turtle           | 32.78                               | 1400000        |
| <i>Eubalaena glacialis</i>         | North Atlantic Right Whale | 516.21                              | 0              |
| <i>Falco cherrug</i>               | Saker Falcon               | 33.17                               | 0              |
| <i>Galaxias neocaledonicus</i>     | Galaxias                   | 10.37                               | 0              |
| <i>Gavialis gangeticus</i>         | Gharial                    | 48.01                               | 35730          |
| <i>Geronticus eremita</i>          | Northern Bald Ibis         | 11.50                               | 45481          |
| <i>Glyphis gangeticus</i>          | Ganges Shark               | 19.97                               | 0              |
| <i>Glyphis glyphis</i>             | Speartooth Shark           | 14.83                               | 0              |
| <i>Glyptemys insculpta</i>         | Wood Turtle                | 24.11                               | 0              |
| <i>Gorilla beringei</i>            | Eastern Gorilla            | 181.76                              | 877349         |
| <i>Gorilla gorilla</i>             | Western Gorilla            | 1165.40                             | 218266         |
| <i>Grus americana</i>              | Whooping Crane             | 17.25                               | 0              |
| <i>Gymnogyps californianus</i>     | California Condor          | 115.24                              | 115677         |
| <i>Gymnomyza samoensis</i>         | Mao                        | 43.08                               | 5020           |
| <i>Hapalemur aureus</i>            | Golden Bamboo Lemur        | 10.46                               | 0              |
| <i>Harpyhaliaetus coronatus</i>    | Crowned Eagle              | 22.07                               | 0              |
| <i>Hippocamelus bisulcus</i>       | Patagonian Huemul          | 13.76                               | 0              |
| <i>Hoolock hoolock</i>             | Western Hoolock Gibbon     | 14.14                               | 291978         |
| <i>Hucho perryi</i>                | Sakhalin Taimen            | 10.98                               | 0              |
| <i>Hylobates lar</i>               | Lar Gibbon                 | 16.57                               | 0              |
| <i>Hylobates moloch</i>            | Silvery Javan Gibbon       | 14.89                               | 3078           |
| <i>Hymenolaimus malacorhynchus</i> | Blue Duck                  | 15.81                               | 0              |
| <i>Hypsirhynchus ater</i>          | Black Racer                | 82.62                               | 0              |
| <i>Indri indri</i>                 | Indri                      | 18.60                               | 5131           |
| <i>Lathamus discolor</i>           | Swift Parrot               | 11.40                               | 0              |
| <i>Latimeria chalumnae</i>         | Coelacanth                 | 15.79                               | 0              |
| <i>Leontopithecus rosalia</i>      | Golden Lion Tamarin        | 86.99                               | 37438          |
| <i>Leopardus jacobita</i>          | Andean Cat                 | 22.70                               | 39261          |
| <i>Lepidochelys kempii</i>         | Kemp's Ridley              | 21.93                               | 18655          |
| <i>Leucogeranus leucogeranus</i>   | Siberian Crane             | 10.05                               | 55838          |
| <i>Lipotes vexillifer</i>          | Yangtze River Dolphin      | 75.81                               | 0              |
| <i>Lontra felina</i>               | Marine Otter               | 27.14                               | 3078           |
| <i>Loris tardigradus</i>           | Red Slender Loris          | 40.37                               | 0              |
| <i>Lycaon pictus</i>               | African Wild Dog           | 142.26                              | 179104         |
| <i>Lynx pardinus</i>               | Iberian Lynx               | 45.64                               | 0              |
| <i>Macaca silenus</i>              | Lion-tailed Macaque        | 12.23                               | 0              |
| <i>Macaca sylvanus</i>             | Barbary Macaque            | 14.76                               | 10653          |
| <i>Maccullochella peelii</i>       | Murray Cod                 | 17.81                               | 0              |
| <i>Macrocephalon maleo</i>         | Maleo                      | 8.38                                | 52731          |
| <i>Mandrillus leucophaeus</i>      | Drill                      | 31.03                               | 0              |
| <i>Marmota vancouverensis</i>      | Vancouver Island Marmot    | 25.05                               | 0              |
| <i>Monachus monachus</i>           | Mediterranean Monk Seal    | 23.46                               | 0              |
| <i>Monachus schauinslandi</i>      | Hawaiian Monk Seal         | 10.15                               | 0              |
| <i>Mustela nigripes</i>            | Black-footed Ferret        | 30.51                               | 0              |

S9 Table continued

| Species                          | Common name               | Average monthly web search interest | Aid data (USD) |
|----------------------------------|---------------------------|-------------------------------------|----------------|
| <i>Mycteroperca fusca</i>        | Comb Grouper              | 28.52                               | 0              |
| <i>Mycteroperca jordani</i>      | Gulf Grouper              | 9.84                                | 0              |
| <i>Myotis sodalis</i>            | Indiana Bat               | 43.21                               | 0              |
| <i>Myrmecobius fasciatus</i>     | Numbat                    | 170.00                              | 0              |
| <i>Nanger dama</i>               | Dama Gazelle              | 18.71                               | 25102          |
| <i>Nasalis larvatus</i>          | Proboscis Monkey          | 71.93                               | 0              |
| <i>Neophron percnopterus</i>     | Egyptian Vulture          | 8.17                                | 4800000        |
| <i>Nestor meridionalis</i>       | Kaka                      | 23.73                               | 0              |
| <i>Nilgiritragus hylocrius</i>   | Nilgiri Tahr              | 12.34                               | 0              |
| <i>Notarius bonillai</i>         | Cazon Sea Catfish         | 11.08                               | 0              |
| <i>Okapia johnstoni</i>          | Okapi                     | 152.27                              | 810106         |
| <i>Onychogalea fraenata</i>      | Bridled Nailtail Wallaby  | 16.83                               | 0              |
| <i>Pagrus pagrus</i>             | Common Seabream           | 7.95                                | 0              |
| <i>Pan paniscus</i>              | Bonobo                    | 2105.62                             | 2000000        |
| <i>Panthera tigris</i>           | Tiger                     | 29765.26                            | 44900000       |
| <i>Panthera uncia</i>            | Snow Leopard              | 541.30                              | 358263         |
| <i>Pantholops hodgsonii</i>      | Chiru                     | 21.49                               | 31530          |
| <i>Pan troglodytes</i>           | Chimpanzee                | 2027.21                             | 2100000        |
| <i>Parantechinus apicalis</i>    | Dibbler                   | 17.79                               | 0              |
| <i>Pardofelis badia</i>          | Borneo Bay Cat            | 4.32                                | 0              |
| <i>Perameles bougainville</i>    | Western Barred Bandicoot  | 31.31                               | 0              |
| <i>Petroica traversi</i>         | Black Robin               | 13.52                               | 0              |
| <i>Pezoporus occidentalis</i>    | Night Parrot              | 14.45                               | 0              |
| <i>Phocoena sinus</i>            | Vaquita                   | 22.09                               | 0              |
| <i>Phyllobates terribilis</i>    | Golden Poison Frog        | 15.65                               | 9453           |
| <i>Pithecophaga jefferyi</i>     | Philippine Eagle          | 22.20                               | 36595          |
| <i>Platanista gangetica</i>      | Ganges River Dolphin      | 30.58                               | 5131           |
| <i>Pongo abelii</i>              | Sumatran Orangutan        | 25.94                               | 222268         |
| <i>Pongo pygmaeus</i>            | Bornean Orangutan         | 26.04                               | 31480          |
| <i>Porcula salvania</i>          | Pygmy Hog                 | 10.91                               | 41628          |
| <i>Porphyrio hochstetteri</i>    | Takahe                    | 19.97                               | 0              |
| <i>Prionailurus viverrinus</i>   | Fishing Cat               | 17.88                               | 0              |
| <i>Pristis pectinata</i>         | Smalltooth Sawfish        | 12.71                               | 10040          |
| <i>Procolobus badius</i>         | West African Red Colobus  | 20.01                               | 30381          |
| <i>Psephurus gladius</i>         | Chinese Paddlefish        | 17.11                               | 0              |
| <i>Pseudalopex fulvipes</i>      | Darwin's Fox              | 8.24                                | 0              |
| <i>Pseudemydura umbrina</i>      | Western Swamp Tortoise    | 22.49                               | 0              |
| <i>Pseudophryne corrobororee</i> | Corroboree Frog           | 23.89                               | 0              |
| <i>Pseudoryx nghetinhensis</i>   | Saola                     | 19.70                               | 5131           |
| <i>Psittirostra psittacea</i>    | Ou                        | 264.78                              | 0              |
| <i>Pteronura brasiliensis</i>    | Giant Otter               | 48.31                               | 4278           |
| <i>Puntius tras</i>              | Tras                      | 14.91                               | 0              |
| <i>Rhinoceros sondaicus</i>      | Javan Rhinoceros          | 27.06                               | 444712         |
| <i>Rhinopithecus strykeri</i>    | Myanmar Snub-nosed Monkey | 5.23                                | 0              |
| <i>Rhynchotus jubatus</i>        | Kagu                      | 6.86                                | 0              |
| <i>Romerolagus diazi</i>         | Volcano Rabbit            | 14.05                               | 0              |
| <i>Saiga tatarica</i>            | Mongolian Saiga           | 30.39                               | 128694         |
| <i>Sarcophilus harrisii</i>      | Tasmanian Devil           | 837.98                              | 0              |
| <i>Sarotherodon linnellii</i>    | Blackbelly Tilapia        | 6.91                                | 0              |
| <i>Spheniscus demersus</i>       | African Penguin           | 136.82                              | 10040          |
| <i>Spheniscus mendiculus</i>     | Galapagos Penguin         | 41.29                               | 0              |
| <i>Sphyrna lewini</i>            | Scalloped Hammerhead      | 27.75                               | 25434          |
| <i>Sphyrna mokarran</i>          | Great Hammerhead          | 2981.86                             | 31873          |

S9 Table continued

| Species                         | Common name                  | Average monthly web search interest | Aid data (USD) |
|---------------------------------|------------------------------|-------------------------------------|----------------|
| <i>Squatina aculeata</i>        | Sawback Angelshark           | 7.16                                | 0              |
| <i>Squatina argentina</i>       | Argentine Angel Shark        | 9.72                                | 0              |
| <i>Squatina oculata</i>         | Smoothback Angel Shark       | 15.41                               | 0              |
| <i>Squatina squatina</i>        | Angel Shark                  | 400.17                              | 0              |
| <i>Stomatepia mongo</i>         | Mongo                        | 20.25                               | 0              |
| <i>Strigops habroptila</i>      | Kakapo                       | 63.27                               | 0              |
| <i>Symphalangus syndactylus</i> | Siamang                      | 30.32                               | 143920         |
| <i>Tapirus bairdii</i>          | Baird's Tapir                | 26.84                               | 26396          |
| <i>Tapirus indicus</i>          | Asian Tapir                  | 26.01                               | 10262          |
| <i>Tapirus pinchaque</i>        | Mountain Tapir               | 11.61                               | 57192          |
| <i>Telmatobius niger</i>        | UCO                          | 9.74                                | 0              |
| <i>Tomistoma schlegelii</i>     | False Gharial                | 6.59                                | 0              |
| <i>Tor khudree</i>              | Black Mahseer                | 11.94                               | 0              |
| <i>Totoaba macdonaldi</i>       | Totoaba                      | 35.60                               | 0              |
| <i>Triakis acutipinna</i>       | Sharpfin Houndshark          | 10.61                               | 0              |
| <i>Varecia variegata</i>        | Black-and-white Ruffed Lemur | 21.58                               | 0              |
| <i>Xanthomyza phrygia</i>       | Regent Honeyeater            | 10.46                               | 0              |
| <i>Zingel asper</i>             | Apron                        | 13.24                               | 0              |
